# Supplementary material for: High-Resolution Snow Water Equivalent Estimation: A Data-Driven Method for Localized Downscaling of Climate Data
Source: Copernicus journal article supplement (doi:10.5194/egusphere-2024-1943), 2024-08-14
Supplement: Supplementary file 1 [file egusphere-2024-1943-supplement.pdf]

## High-Resolution Snow Water Equivalent Estimation: A Data-Driven Method for Localized Downscaling of Climate Data

Fatemeh Zakeri <sup>a,b</sup>, Gregoire Mariethoz <sup>a</sup>, Manuela Girotto<sup>b</sup>

<sup>a</sup> Institute of Earth Surface Dynamics, Faculty of Geosciences and Environment, University of Lausanne, Lausanne, Switzerland

<sup>b</sup> Department of Environmental Science, Policy, and Management, University of California, Berkeley, Berkeley, CA, USA

*Correspondence to:* Fatemeh Zakeri (fatemeh.zakeri@unil.ch; fatemeh.zakeri@berkeley.edu)

**Table S1. Annual Averaged SPEI Values and Interpretations for California and Colorado, 1985-2014.**

| Year | California    |                     | Colorado      |                     |
|------|---------------|---------------------|---------------|---------------------|
|      | Averaged SPEI | Interpretation      | Averaged SPEI | Interpretation      |
| 1985 | 0.02          | Near Normal         | 0.86          | Slightly Wet        |
| 1986 | 0.54          | Incipient Wet Spell | 0.85          | Slightly Wet        |
| 1987 | -0.25         | Near Normal         | -0.59         | Incipient Dry Spell |
| 1988 | -0.9          | Mild Drought        | -0.61         | Incipient Dry Spell |
| 1989 | -0.28         | Near Normal         | -1.04         | Mild Drought        |
| 1990 | -0.98         | Mild Drought        | -0.47         | Near Normal         |
| 1991 | 0.33          | Near Normal         | 0.11          | Near Normal         |
| 1992 | -0.23         | Near Normal         | -0.51         | Incipient Dry Spell |
| 1993 | 0.5           | Incipient Wet Spell | 0.63          | Incipient Wet Spell |
| 1994 | -0.53         | Incipient Dry Spell | -1.44         | Moderate Drought    |
| 1995 | 1.21          | Slightly Wet        | 1.58          | Moderately Wet      |
| 1996 | 1.31          | Moderately Wet      | 0.93          | Slightly Wet        |
| 1997 | 0.18          | Near Normal         | 0.85          | Slightly Wet        |
| 1998 | 1.28          | Slightly Wet        | -0.07         | Near Normal         |
| 1999 | -0.26         | Near Normal         | 0.07          | Near Normal         |
| 2000 | -0.15         | Near Normal         | -0.35         | Near Normal         |
| 2001 | -0.13         | Near Normal         | -0.74         | Incipient Dry Spell |
| 2002 | -0.81         | Mild Drought        | -1.64         | Severe Drought      |
| 2003 | -0.66         | Incipient Dry Spell | -0.32         | Near Normal         |
| 2004 | -0.65         | Incipient Dry Spell | -0.65         | Incipient Dry Spell |
| 2005 | 0.89          | Slightly Wet        | 0.54          | Incipient Wet Spell |
| 2006 | 0.03          | Near Normal         | -0.01         | Near Normal         |
| 2007 | -1.74         | Severe Drought      | -0.19         | Near Normal         |
| 2008 | -0.73         | Incipient Dry Spell | 0.5           | Near Normal         |
| 2009 | -0.1          | Near Normal         | -0.31         | Near Normal         |
| 2010 | 0.87          | Slightly Wet        | -0.89         | Mild Drought        |
| 2011 | 0.19          | Near Normal         | 0.29          | Near Normal         |
| 2012 | -0.6          | Incipient Dry Spell | -2.08         | Extreme Drought     |
| 2013 | -1.97         | Severe Drought      | 0.62          | Incipient Wet Spell |
| 2014 | -1.23         | Mild Drought        | 0.96          | Slightly Wet        |

**100 km**

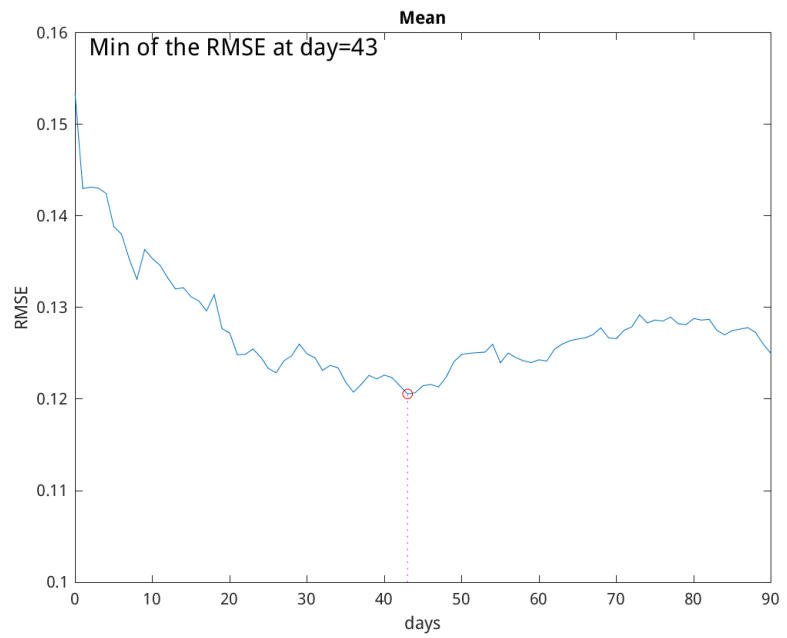

**9 km**

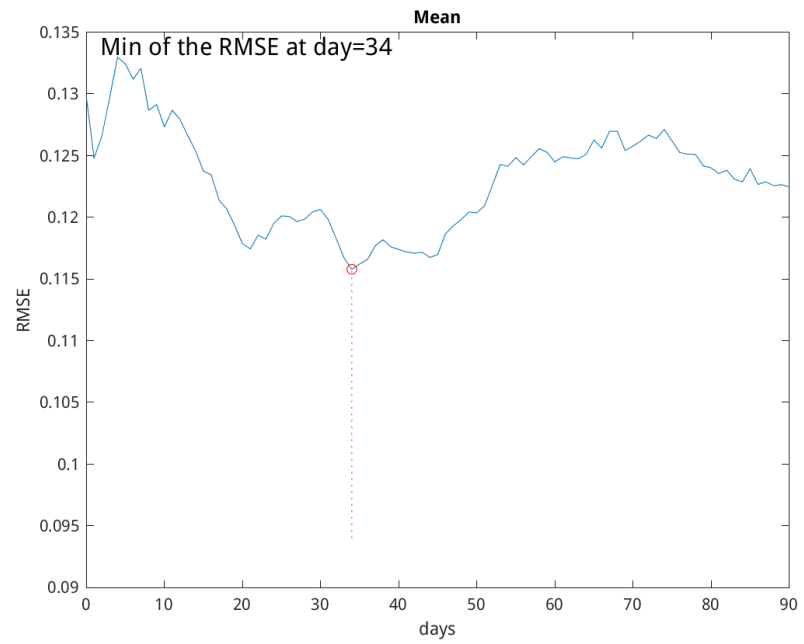

**mpi-esm 1-2 Model**

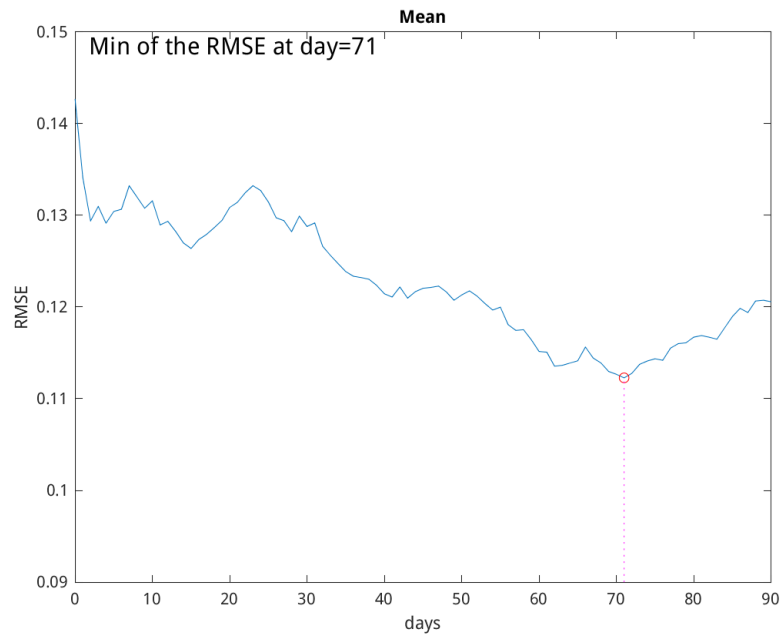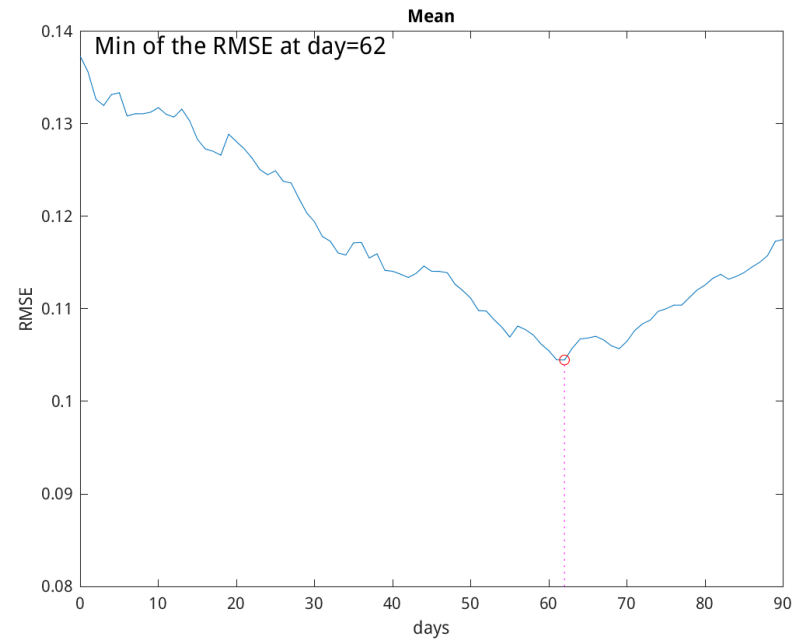

**cnrm-esm 2-1 Model**

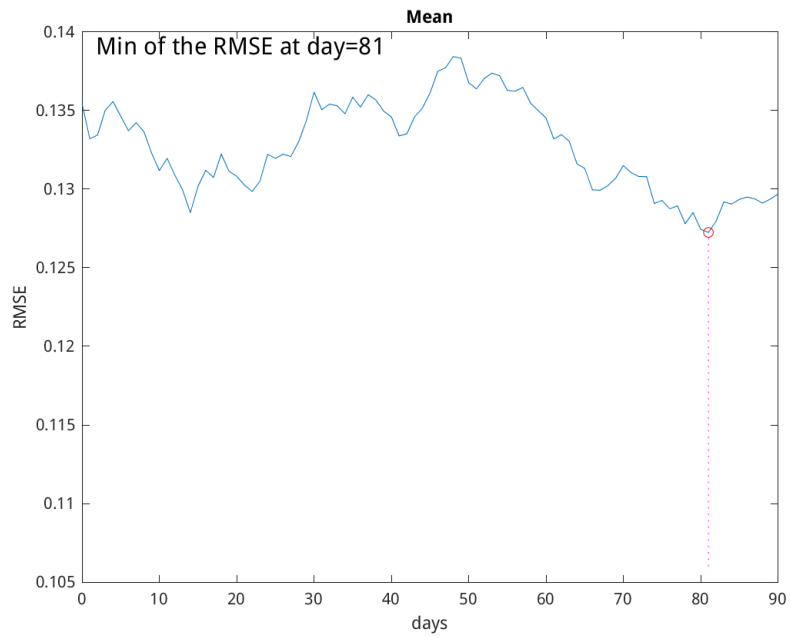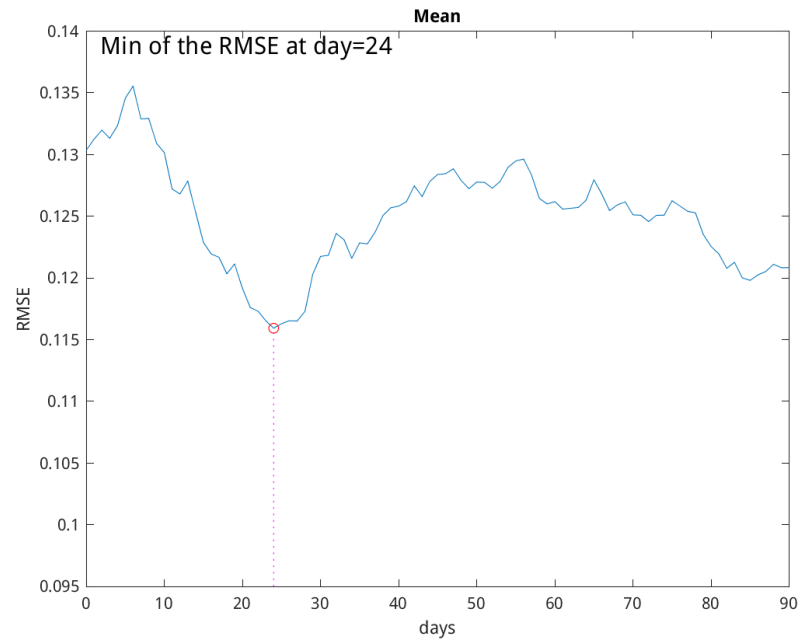

### ec-earth3-veg Model

**Fig. S1. Estimation of the Far Temporal Interval (FI) for Climate Data in California. The terms '9 km' and '100 km' indicate the resolution of the climate data estimators.**

### 100 km

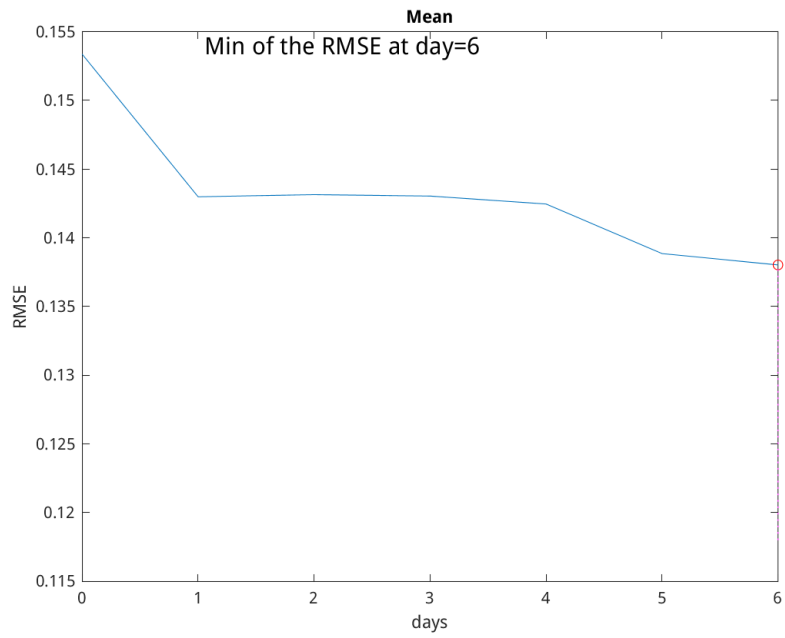

### 9 km

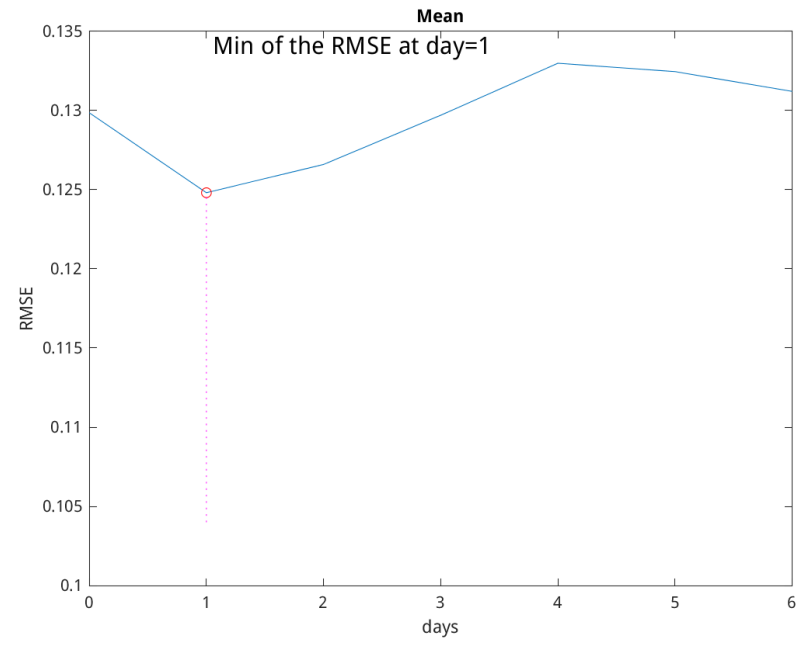

### mpi-esm 1-2 Model

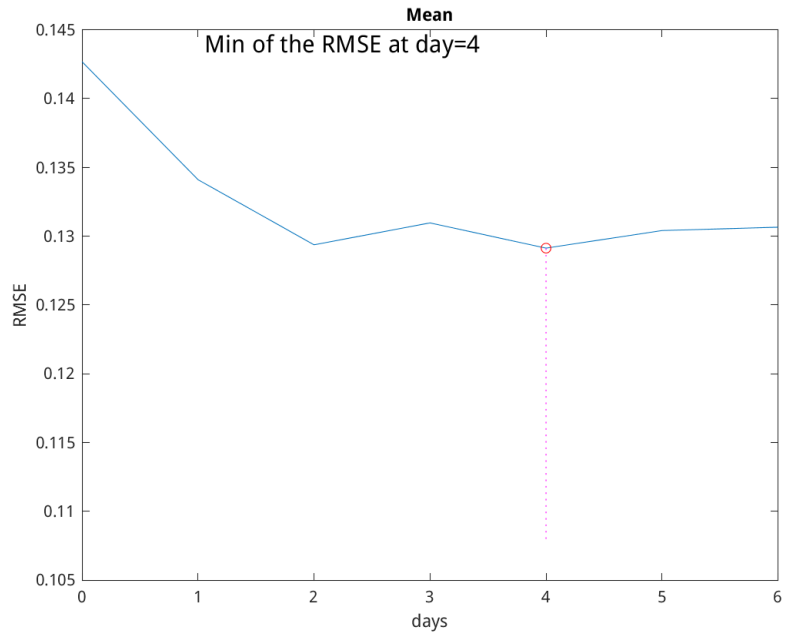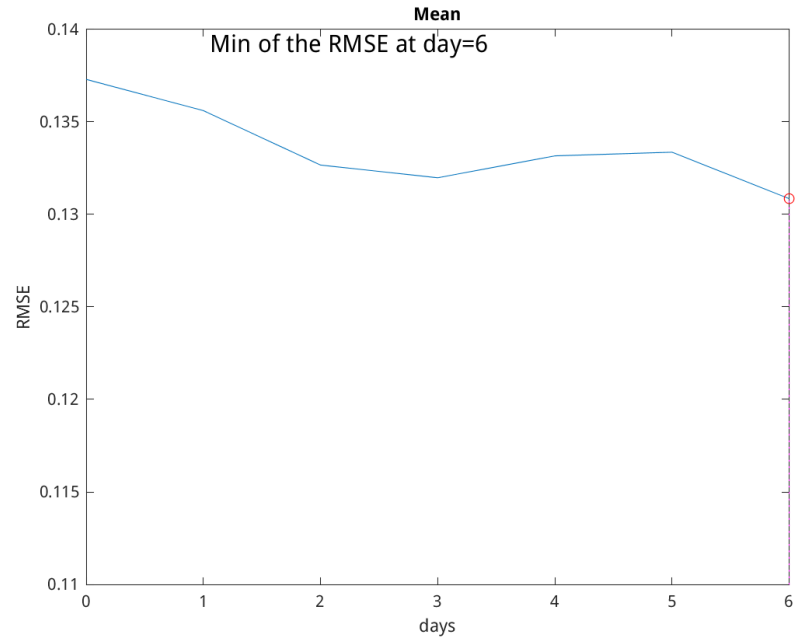

**cnrm-esm 2-1 Model**

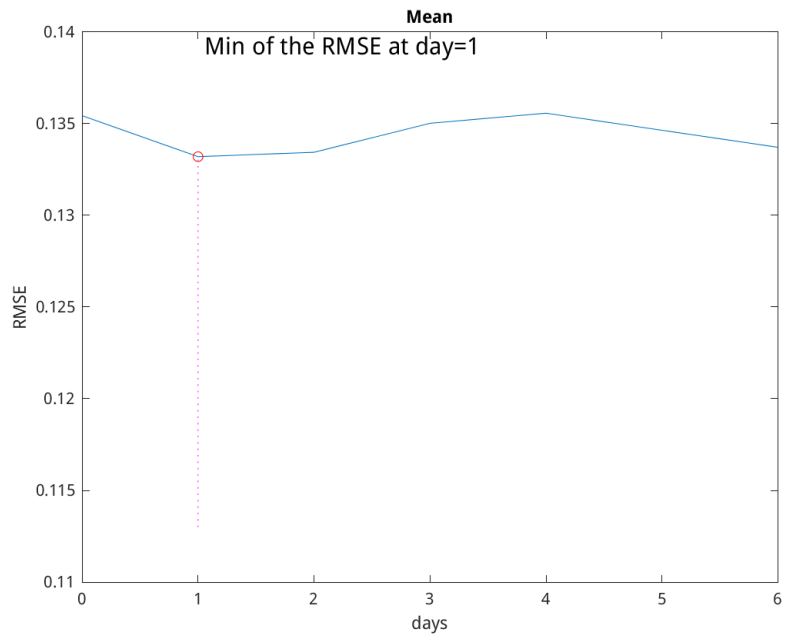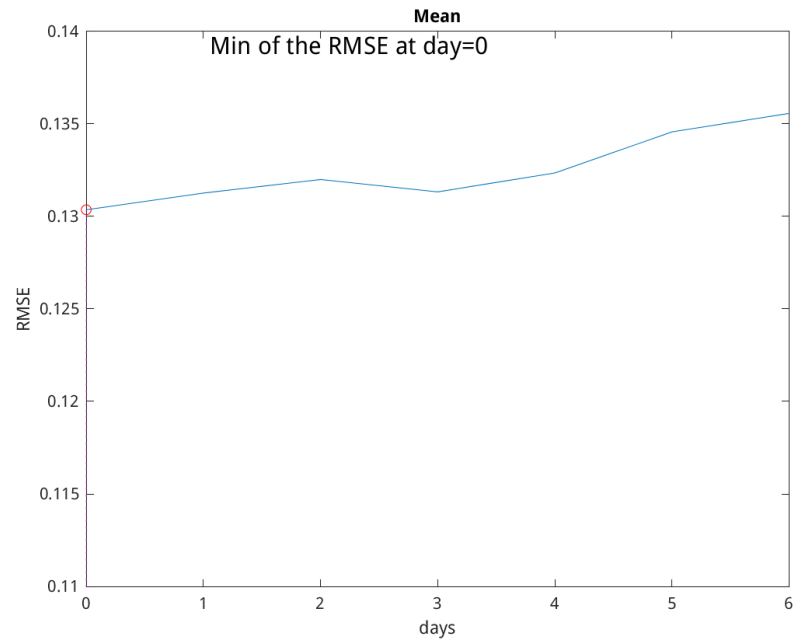

**ec-earth3-veg Model**

**Fig. S2. Estimation of the Near Temporal Interval (NI) for Climate Data in California. The terms '9 km' and '100 km' indicate the resolution of the climate data estimators.**

**100 km**

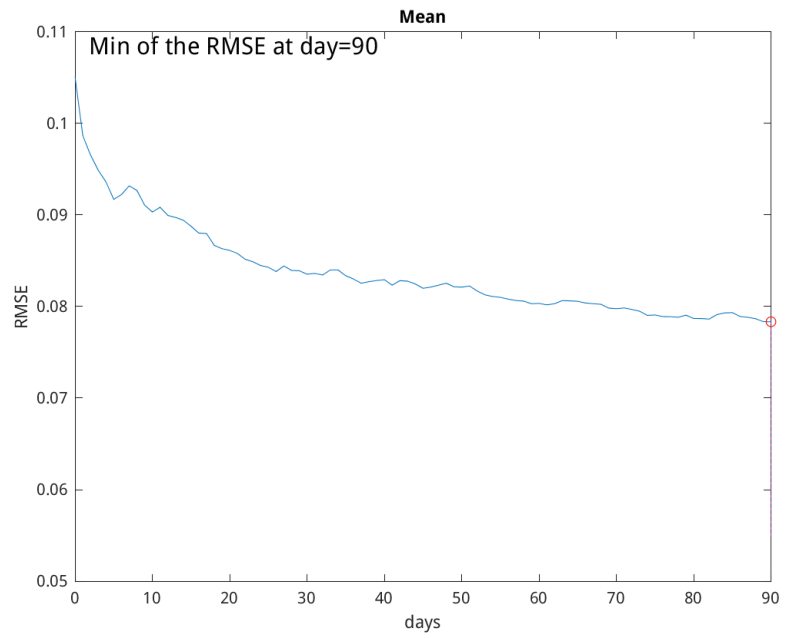

**9 km**

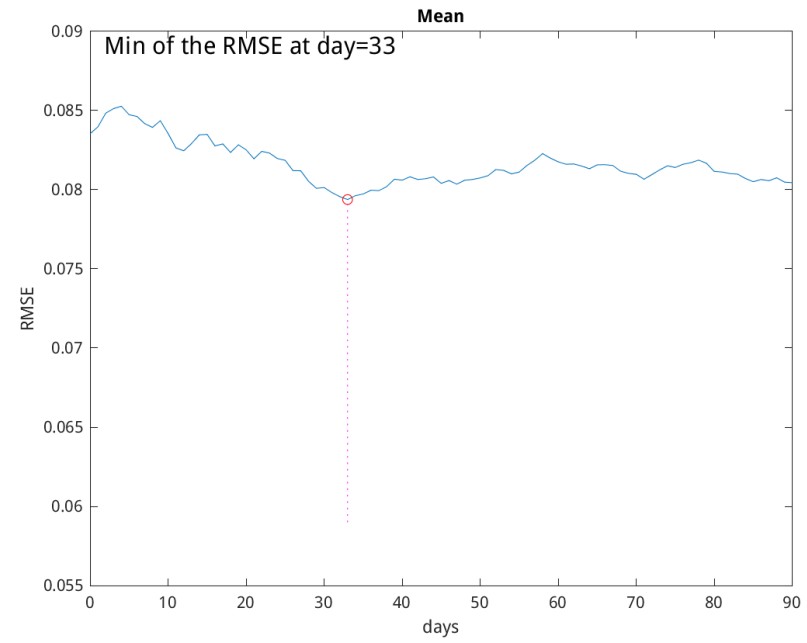

**mpi-esm 1-2 Model**



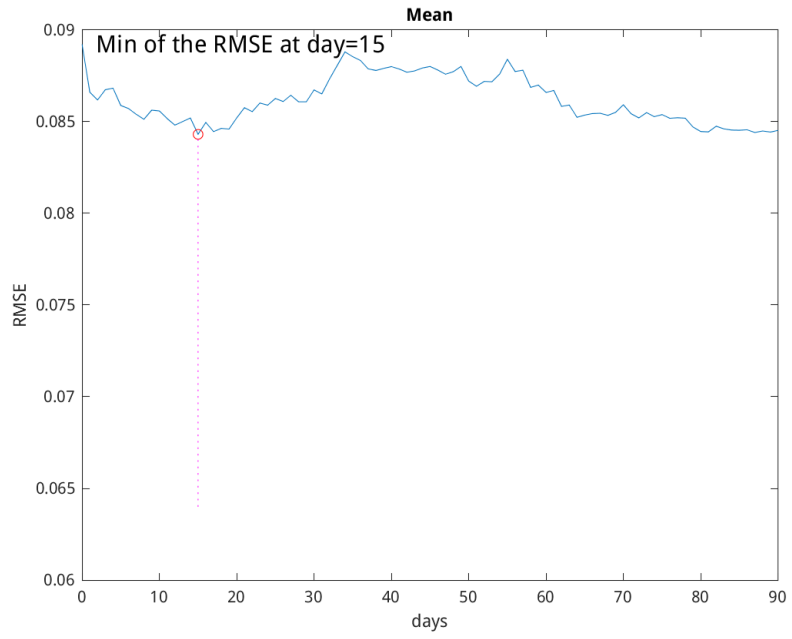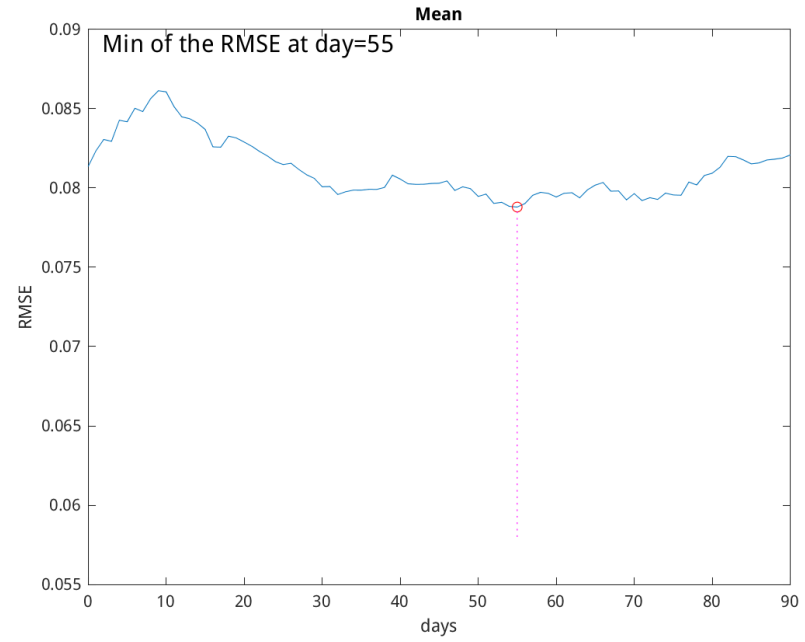

**cnrm-esm 2-1 Model**

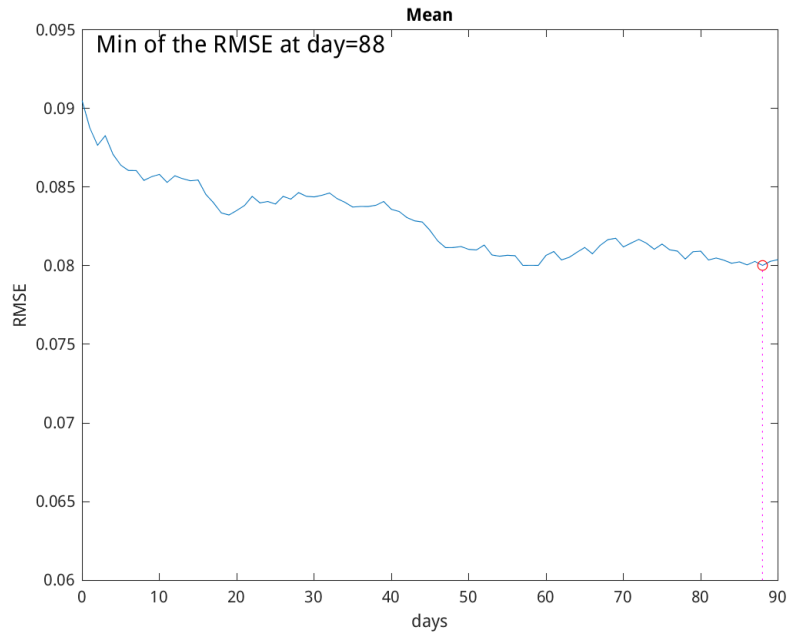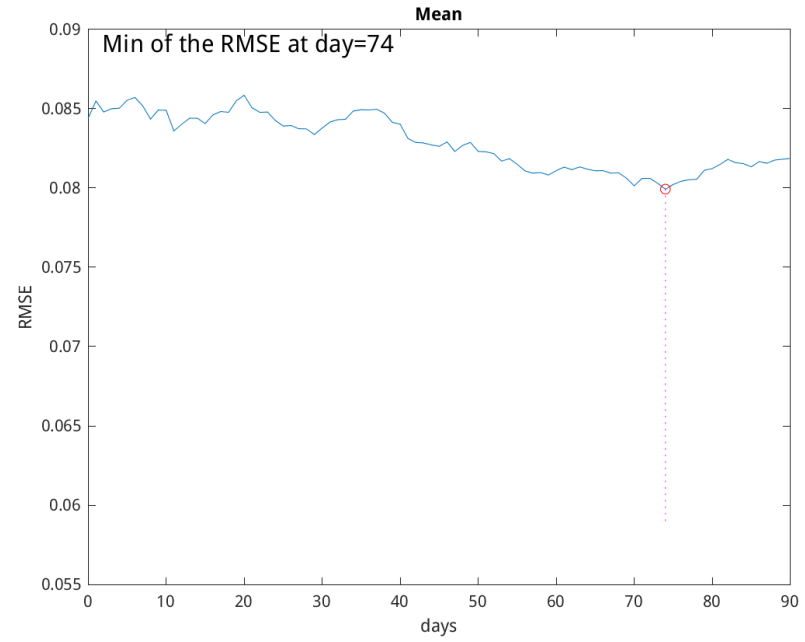

**ec-earth3-veg Model**

**Fig. S3. Same as Fig. S1, but for Colorado.**

### 100 km

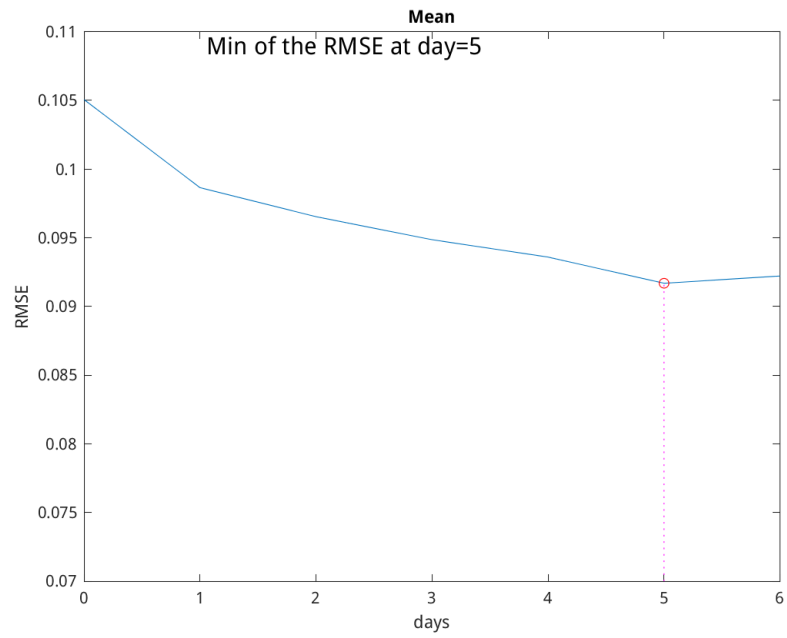

### 9 km

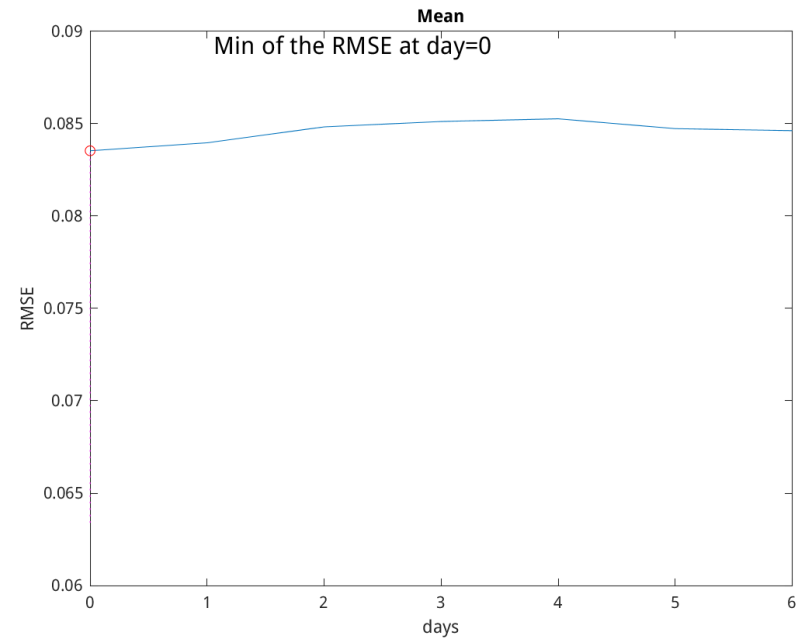

mpi-esm 1-2 Model

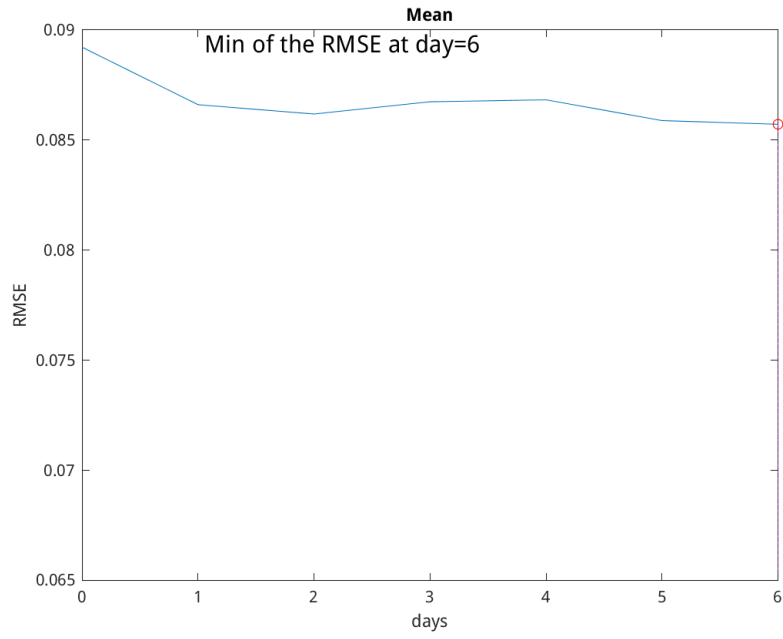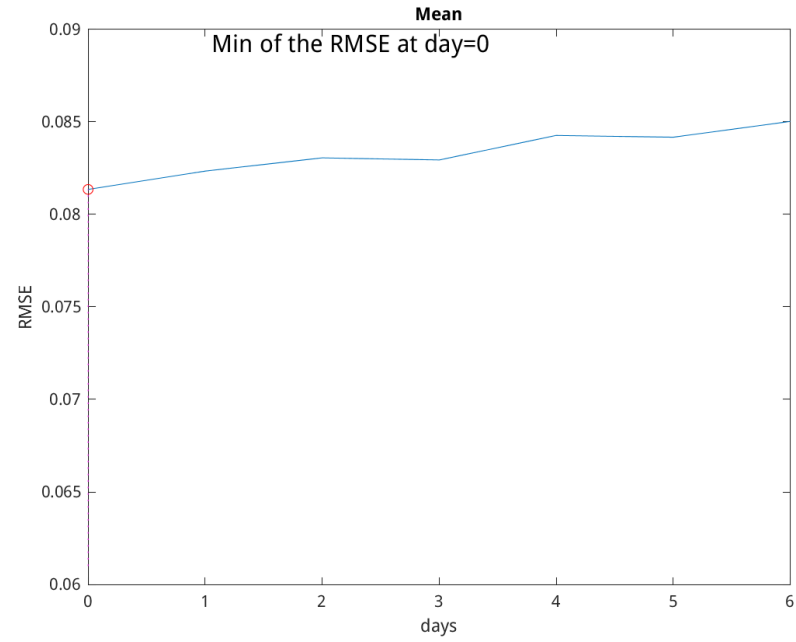

**cnrm-esm 2-1 Model**

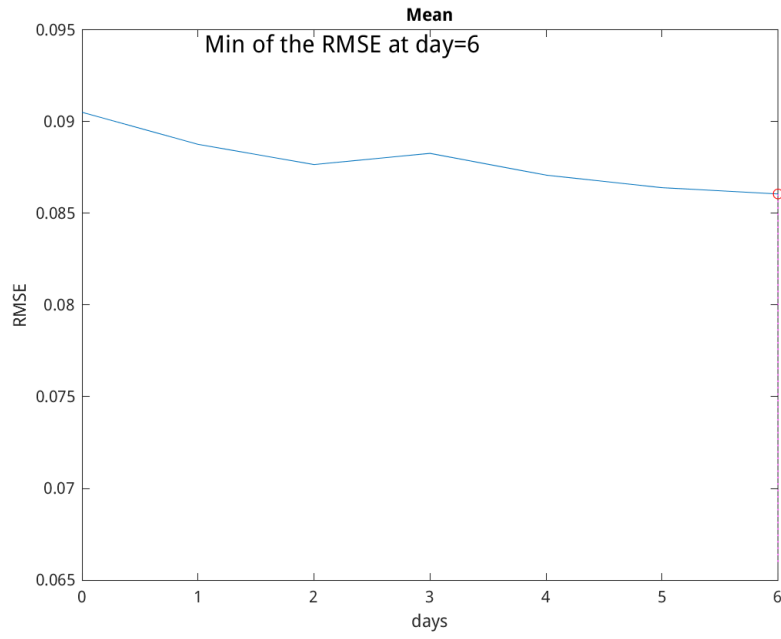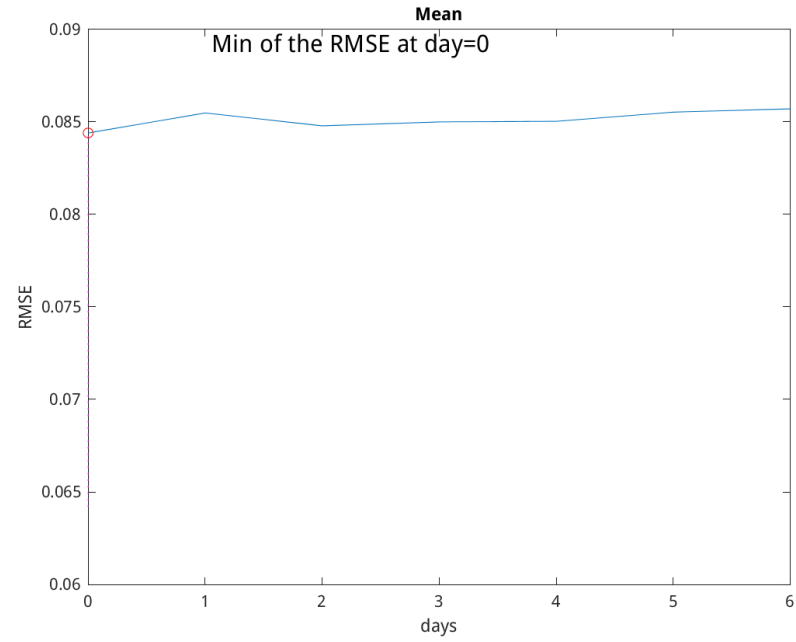

**ec-earth3-veg Model**

**Fig. S4. Same as Fig. S2, but for Colorado.**

### 100 km

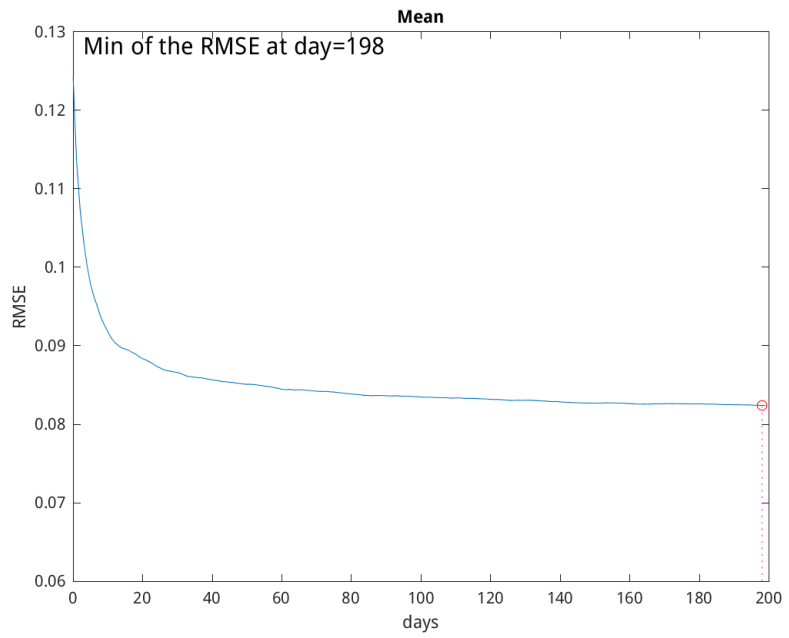

### 9 km

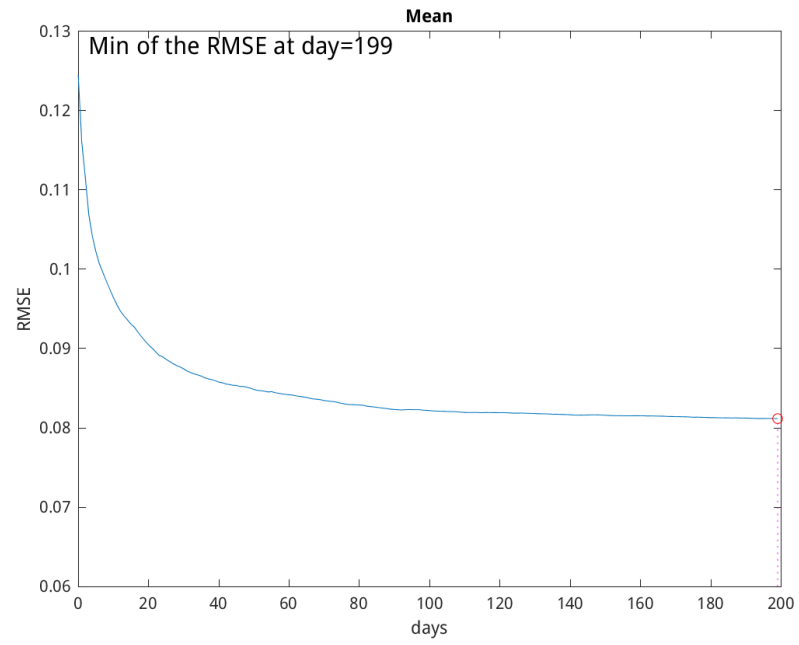

### mpi-esm 1-2 Model

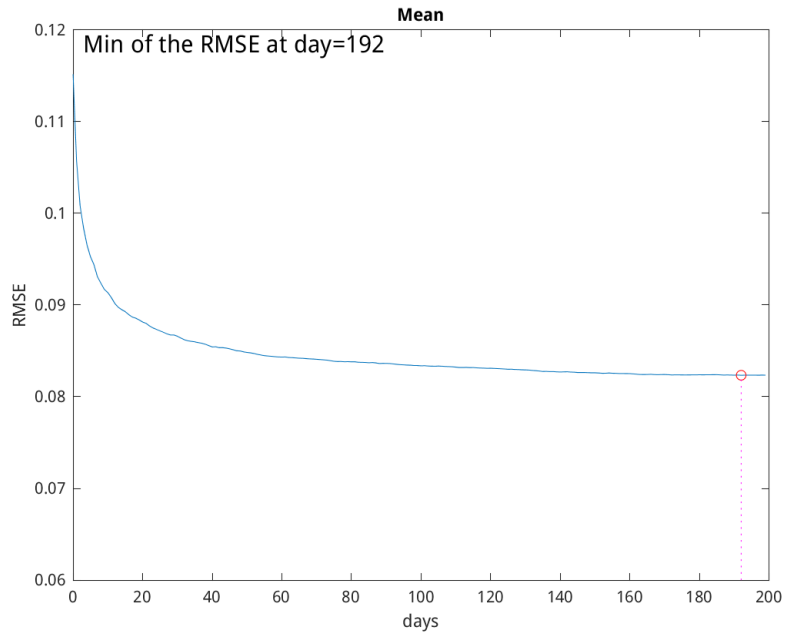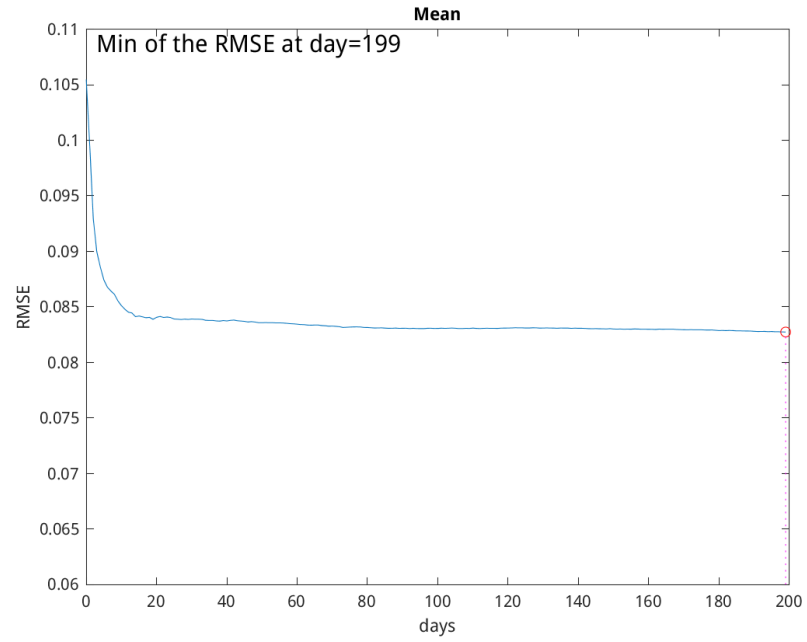

**cnrm-esm 2-1 Model**

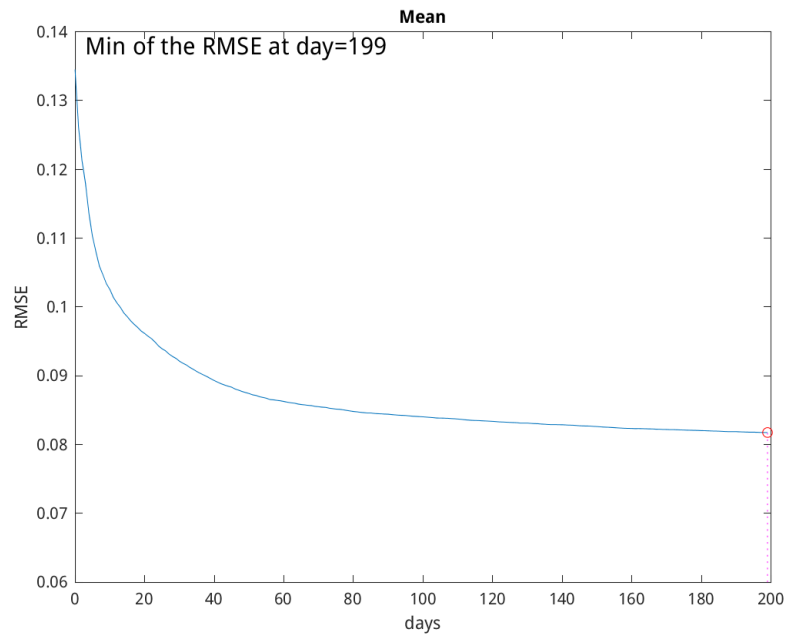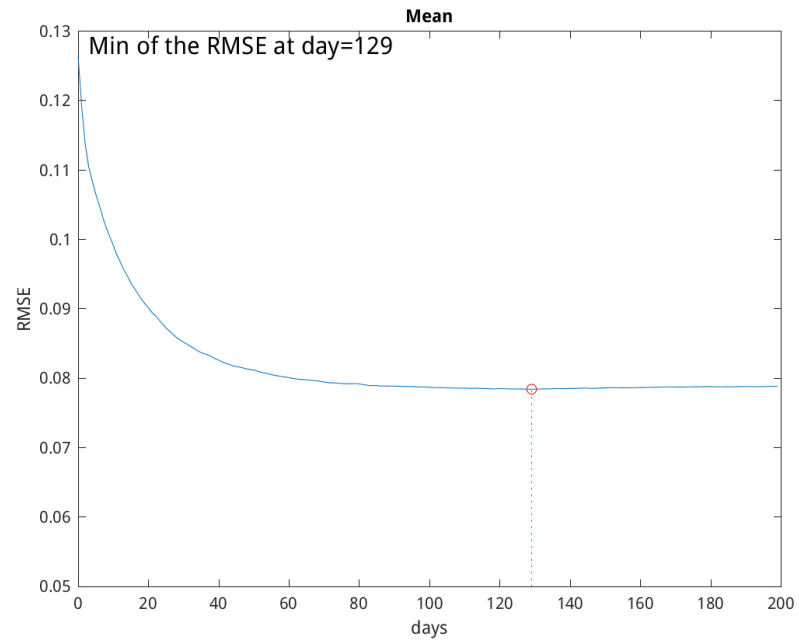

**ec-earth3-veg Model**

**Fig. S5. Estimating the Number of K-Nearest Observations for California. '9 km' and '100 km' denote the resolution of the climate data estimators.**



**100 km**

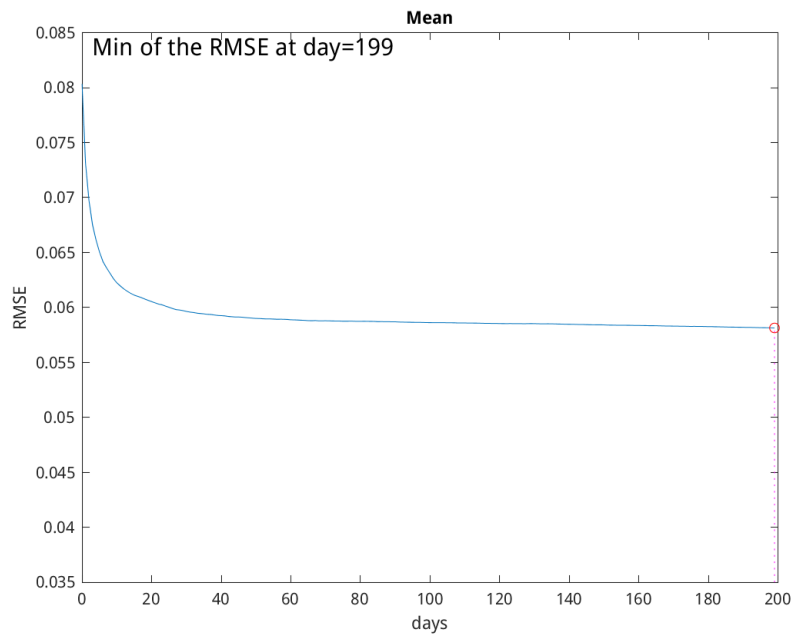

**9 km**

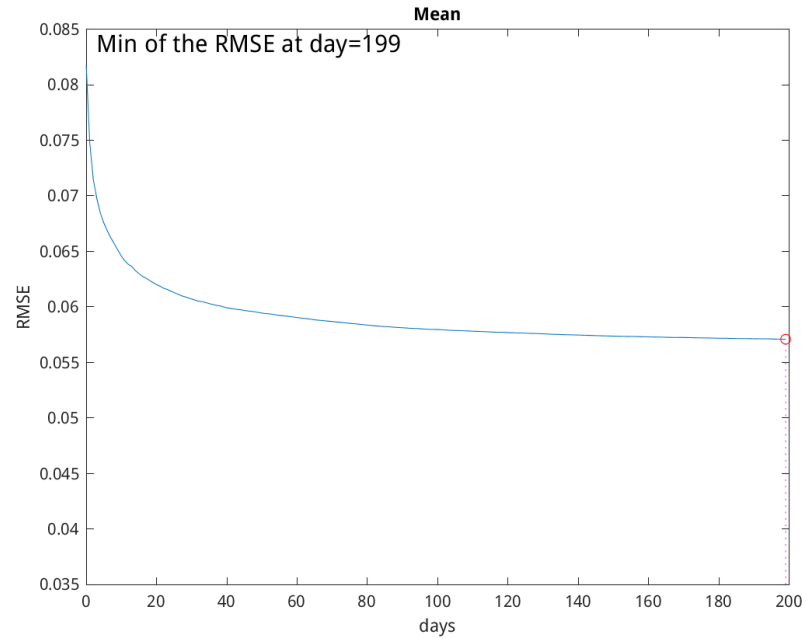

**mpi-esm 1-2 Model**

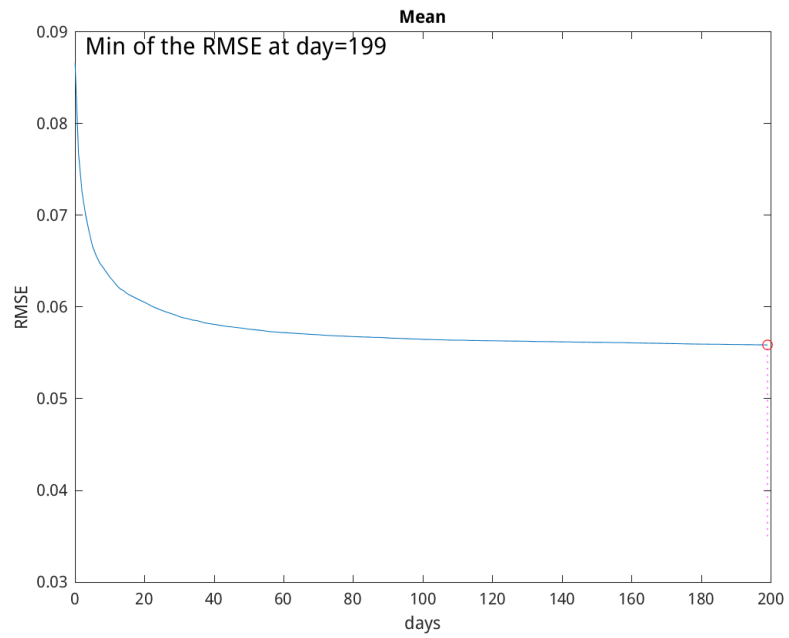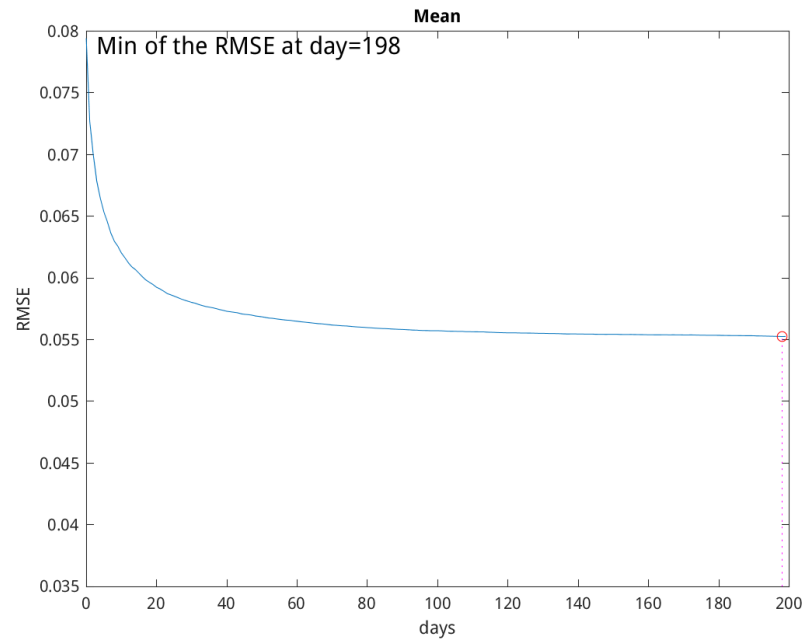

**cnrm-esm 2-1 Model**

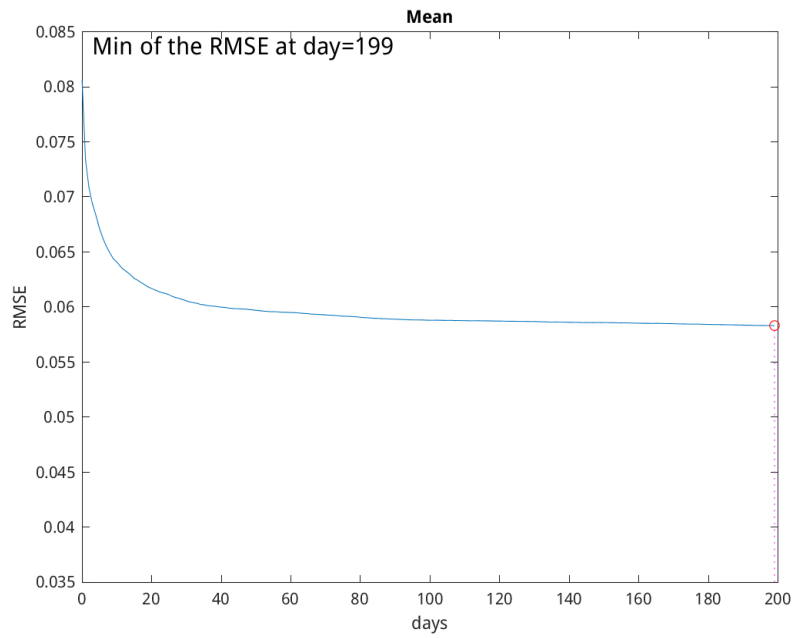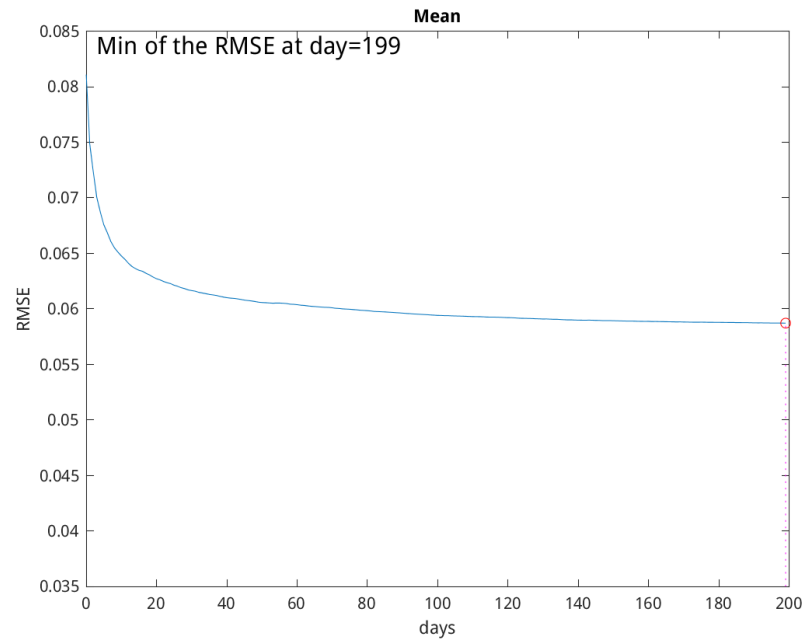

### ec-earth3-veg Model

Fig. S6. Same as Fig. S5, but for Colorado.

Table S2. Accuracy assessment of downscaling cross-validation in California: metrics include Correlation Coefficient (R), Mean Difference (MD), and Root-Mean-Squared Error (RMSE). Here, 'h' denotes elevation, 'Forest' pertains to forest land cover pixels, 'NoForest' to non-forest pixels, and '9 km' and '10 km' represent the resolutions of the climate data estimators.

| cnrm-esm2-1 Model   |     |         |     |      |     |     |     |        |     |          |     |             |      |     |         |     |      |     |        |          |     |                 |     |         |      |      |      |        |          |      |      |      |      |      |      |      |      |      |   |   |
|---------------------|-----|---------|-----|------|-----|-----|-----|--------|-----|----------|-----|-------------|------|-----|---------|-----|------|-----|--------|----------|-----|-----------------|-----|---------|------|------|------|--------|----------|------|------|------|------|------|------|------|------|------|---|---|
| RMSE                |     |         |     |      |     |     |     |        |     |          |     | Correlation |      |     |         |     |      |     |        |          |     | Mean Difference |     |         |      |      |      |        |          |      |      |      |      |      |      |      |      |      |   |   |
| h<2k                |     | 2k<h<3k |     | h>3k |     | All |     | Forest |     | NoForest |     | All         | h<2k |     | 2k<h<3k |     | h>3k |     | Forest | NoForest | All | h<2k            |     | 2k<h<3k |      | h>3k |      | Forest | NoForest |      |      |      |      |      |      |      |      |      |   |   |
| 9                   | 100 | 9       | 100 | 9    | 100 | 9   | 100 | 9      | 100 | 9        | 100 | 9           | 100  | 9   | 100     | 9   | 100  | 9   | 100    | 9        | 100 | 9               | 100 | 9       | 100  | 9    | 100  | 9      | 100      | 9    | 100  |      |      |      |      |      |      |      |   |   |
| Oct                 | .01 | .01     | .01 | .01  | .01 | .01 | .02 | .02    | .01 | .01      | .01 | .01         | .76  | .73 | .75     | .73 | .75  | .73 | .79    | .78      | .66 | .64             | .76 | .74     | 0    | 0    | 0    | 0      | 0        | 0    | 0    | 0    | 0    | 0    |      |      |      |      |   |   |
| Nov                 | .03 | .03     | .02 | .02  | .03 | .03 | .04 | .04    | .03 | .03      | .03 | .03         | .56  | .56 | .53     | .53 | .56  | .56 | .7     | .7       | .47 | .47             | .57 | .57     | -.01 | -.01 | -.01 | -.01   | -.02     | -.02 | -.03 | -.02 | -.02 | -.02 | -.01 | -.01 |      |      |   |   |
| Dec                 | .07 | .08     | .04 | .05  | .08 | .1  | .11 | .12    | .09 | .11      | .07 | .08         | .85  | .85 | .84     | .84 | .85  | .84 | .85    | .84      | .8  | .8              | .85 | .85     | -.01 | -.02 | 0    | -.01   | -.02     | -.03 | -.03 | -.04 | -.02 | -.03 | -.01 | -.02 |      |      |   |   |
| Jan                 | .09 | .1      | .06 | .06  | .1  | .11 | .13 | .14    | .12 | .12      | .09 | .09         | .95  | .95 | .95     | .95 | .95  | .94 | .92    | .92      | .9  | .9              | .95 | .95     | -.01 | -.02 | -.01 | -.01   | -.02     | -.02 | -.03 | -.04 | -.03 | -.04 | -.01 | -.02 |      |      |   |   |
| Feb                 | .12 | .11     | .08 | .08  | .13 | .13 | .16 | .15    | .16 | .16      | .12 | .11         | .95  | .95 | .95     | .95 | .95  | .95 | .93    | .92      | .91 | .91             | .95 | .95     | -.01 | 0    | -.01 | 0      | -.01     | 0    | -.02 | -.01 | -.03 | -.02 | -.01 | 0    |      |      |   |   |
| Mar                 | .15 | .17     | .09 | .1   | .17 | .2  | .21 | .24    | .2  | .22      | .15 | .17         | .96  | .95 | .96     | .96 | .95  | .95 | .93    | .93      | .93 | .92             | .96 | .95     | .04  | .07  | .02  | .03    | .06      | .1   | .07  | .14  | .06  | .12  | .04  | .07  |      |      |   |   |
| Apr                 | .21 | .22     | .12 | .13  | .24 | .26 | .32 | .35    | .26 | .28      | .21 | .22         | .95  | .95 | .95     | .95 | .95  | .95 | .93    | .93      | .92 | .92             | .95 | .95     | .07  | .08  | .03  | .03    | .09      | .11  | .14  | .19  | .11  | .14  | .07  | .08  |      |      |   |   |
| May                 | .18 | .19     | .11 | .11  | .21 | .22 | .31 | .32    | .21 | .22      | .18 | .19         | .92  | .93 | .92     | .92 | .92  | .92 | .91    | .91      | .91 | .91             | .92 | .93     | .01  | .03  | 0    | .01    | .01      | .04  | .03  | .09  | .01  | .05  | .01  | .03  |      |      |   |   |
| Jun                 | .11 | .1      | .06 | .05  | .13 | .11 | .2  | .18    | .11 | .1       | .11 | .1          | .83  | .84 | .83     | .83 | .83  | .84 | .81    | .82      | .82 | .82             | .83 | .84     | 0    | 0    | 0    | 0      | 0        | 0    | 0    | .02  | -.01 | 0    | 0    | 0    | 0    |      |   |   |
| Jul                 | .04 | .04     | .02 | .02  | .05 | .04 | .09 | .08    | .04 | .03      | .04 | .04         | .71  | .72 | .7      | .71 | .71  | .72 | .7     | .72      | .67 | .68             | .71 | .73     | 0    | 0    | 0    | 0      | 0        | 0    | 0    | 0    | 0    | 0    | 0    | 0    | 0    |      |   |   |
| Aug                 | .02 | .02     | .01 | .01  | .02 | .02 | .04 | .04    | .01 | .01      | .02 | .02         | .63  | .65 | .62     | .64 | .63  | .65 | .65    | .67      | .54 | .57             | .63 | .65     | 0    | 0    | 0    | 0      | 0        | 0    | 0    | -.01 | -.01 | 0    | 0    | 0    | 0    | 0    |   |   |
| Sep                 | .01 | .01     | .01 | .01  | .01 | .01 | .02 | .02    | .01 | .01      | .01 | .01         | .68  | .74 | .68     | .74 | .67  | .73 | .71    | .76      | .57 | .65             | .68 | .74     | 0    | 0    | 0    | 0      | 0        | 0    | 0    | 0    | 0    | 0    | 0    | 0    | 0    | 0    | 0 |   |
| ec_earth3_veg Model |     |         |     |      |     |     |     |        |     |          |     |             |      |     |         |     |      |     |        |          |     |                 |     |         |      |      |      |        |          |      |      |      |      |      |      |      |      |      |   |   |
| RMSE                |     |         |     |      |     |     |     |        |     |          |     | Correlation |      |     |         |     |      |     |        |          |     | Mean Difference |     |         |      |      |      |        |          |      |      |      |      |      |      |      |      |      |   |   |
| h<2k                |     | 2k<h<3k |     | h>3k |     | All |     | Forest |     | NoForest |     | All         | h<2k |     | 2k<h<3k |     | h>3k |     | Forest | NoForest | All | h<2k            |     | 2k<h<3k |      | h>3k |      | Forest | NoForest |      |      |      |      |      |      |      |      |      |   |   |
| 9                   | 100 | 9       | 100 | 9    | 100 | 9   | 100 | 9      | 100 | 9        | 100 | 9           | 100  | 9   | 100     | 9   | 100  | 9   | 100    | 9        | 100 | 9               | 100 | 9       | 100  | 9    | 100  | 9      | 100      | 9    | 100  | 9    | 100  |      |      |      |      |      |   |   |
| Oct                 | .01 | .01     | .01 | .01  | .01 | .01 | .02 | .02    | .01 | .01      | .01 | .01         | .76  | .75 | .77     | .76 | .75  | .74 | .78    | .77      | .69 | .66             | .76 | .75     | 0    | 0    | 0    | 0      | 0        | 0    | 0    | 0    | 0    | 0    | 0    | 0    | 0    | 0    |   |   |
| Nov                 | .02 | .02     | .01 | .01  | .02 | .02 | .04 | .04    | .02 | .02      | .02 | .02         | .67  | .69 | .65     | .67 | .67  | .68 | .72    | .75      | .59 | .59             | .67 | .69     | -.01 | 0    | 0    | 0      | -.01     | -.01 | -.02 | -.01 | -.01 | 0    | -.01 | 0    | -.01 | 0    |   |   |
| Dec                 | .06 | .05     | .04 | .03  | .07 | .06 | .09 | .08    | .07 | .07      | .06 | .05         | .84  | .85 | .83     | .84 | .84  | .85 | .83    | .84      | .79 | .8              | .84 | .85     | -.01 | -.01 | 0    | 0      | -.01     | -.01 | -.02 | -.03 | -.01 | -.01 | -.01 | -.01 | -.01 | -.01 |   |   |
| Jan                 | .1  | .11     | .06 | .07  | .12 | .12 | .15 | .16    | .13 | .14      | .1  | .11         | .95  | .95 | .95     | .95 | .95  | .95 | .92    | .92      | .91 | .91             | .95 | .95     | .04  | .03  | .02  | .01    | .05      | .04  | .06  | .04  | .06  | .05  | .04  | .03  |      |      |   |   |
| Feb                 | .13 | .15     | .08 | .09  | .15 | .17 | .18 | .2     | .18 | .2       | .13 | .14         | .95  | .95 | .95     | .95 | .95  | .95 | .93    | .93      | .91 | .91             | .95 | .95     | .04  | .04  | .02  | .02    | .06      | .05  | .08  | .06  | .07  | .07  | .04  | .04  |      |      |   |   |
| Mar                 | .14 | .14     | .09 | .09  | .16 | .16 | .21 | .2     | .19 | .19      | .14 | .14         | .96  | .96 | .96     | .96 | .95  | .96 | .94    | .94      | .92 | .93             | .96 | .96     | .04  | .03  | .02  | .01    | .06      | .04  | .08  | .06  | .07  | .06  | .04  | .03  |      |      |   |   |
| Apr                 | .17 | .18     | .11 | .11  | .2  | .21 | .27 | .28    | .22 | .24      | .17 | .18         | .95  | .95 | .95     | .95 | .95  | .95 | .94    | .93      | .93 | .93             | .96 | .95     | .03  | .04  | .01  | .01    | .04      | .05  | .07  | .09  | .05  | .07  | .03  | .04  |      |      |   |   |
| May                 | .18 | .17     | .1  | .1   | .21 | .2  | .3  | .3     | .2  | .2       | .18 | .17         | .93  | .93 | .92     | .92 | .92  | .92 | .91    | .91      | .91 | .91             | .93 | .93     | .02  | .02  | 0    | .01    | .02      | .03  | .06  | .07  | .02  | .03  | .02  | .02  | .02  |      |   |   |
| Jun                 | .11 | .12     | .06 | .07  | .13 | .14 | .2  | .22    | .11 | .13      | .11 | .12         | .83  | .82 | .83     | .82 | .83  | .82 | .81    | .81      | .82 | .81             | .83 | .82     | .02  | .02  | .01  | 0      | .02      | .02  | .06  | .06  | .02  | .02  | .02  | .02  | .02  | .02  |   |   |
| Jul                 | .04 | .04     | .02 | .02  | .05 | .04 | .08 | .08    | .04 | .03      | .04 | .04         | .71  | .72 | .7      | .71 | .71  | .72 | .7     | .72      | .68 | .68             | .71 | .73     | 0    | 0    | 0    | 0      | 0        | 0    | 0    | -.01 | 0    | 0    | 0    | 0    | 0    | 0    |   |   |
| Aug                 | .02 | .02     | .01 | .01  | .02 | .02 | .03 | .04    | .01 | .01      | .02 | .02         | .7   | .68 | .7      | .67 | .7   | .67 | .73    | .7       | .58 | .6              | .71 | .68     | 0    | 0    | 0    | 0      | 0        | 0    | 0    | 0    | 0    | -.01 | 0    | 0    | 0    | 0    | 0 | 0 |
| Sep                 | .01 | .01     | 0   | .01  | .01 | .01 | .02 | .02    | .01 | .01      | .01 | .01         | .75  | .71 | .75     | .71 | .74  | .7  | .78    | .74      | .63 | .6              | .75 | .71     | 0    | 0    | 0    | 0      | 0        | 0    | 0    | 0    | 0    | 0    | 0    | 0    | 0    | 0    | 0 |   |
| mpi-esm1-2 Model    |     |         |     |      |     |     |     |        |     |          |     |             |      |     |         |     |      |     |        |          |     |                 |     |         |      |      |      |        |          |      |      |      |      |      |      |      |      |      |   |   |
| RMSE                |     |         |     |      |     |     |     |        |     |          |     | Correlation |      |     |         |     |      |     |        |          |     | Mean Difference |     |         |      |      |      |        |          |      |      |      |      |      |      |      |      |      |   |   |
| h<2k                |     | 2k<h<3k |     | h>3k |     | All |     | Forest |     | NoForest |     | All         | h<2k |     | 2k<h<3k |     | h>3k |     | Forest | NoForest | All | h<2k            |     | 2k<h<3k |      | h>3k |      | Forest | NoForest |      |      |      |      |      |      |      |      |      |   |   |
| 9                   | 100 | 9       | 100 | 9    | 100 | 9   | 100 | 9      | 100 | 9        | 100 | 9           | 100  | 9   | 100     | 9   | 100  | 9   | 100    | 9        | 100 | 9               | 100 | 9       | 100  | 9    | 100  | 9      | 100      | 9    | 100  | 9    | 100  |      |      |      |      |      |   |   |
| Oct                 | .01 | .01     | .01 | .01  | .01 | .01 | .02 | .02    | .01 | .01      | .01 | .01         | .73  | .74 | .73     | .75 | .72  | .73 | .77    | .77      | .64 | .66             | .73 | .74     | 0    | 0    | 0    | 0      | 0        | 0    | 0    | 0    | 0    | 0    | 0    | 0    | 0    | 0    | 0 |   |
| Nov                 | .02 | .02     | .01 | .01  | .03 | .03 | .04 | .04    | .03 | .02      | .02 | .02         | .65  | .7  | .62     | .67 | .65  | .69 | .74    | .77      | .54 | .6              | .65 | .7      | -.01 | -.01 | 0    | 0      | -.01     | -.01 | -.02 | -.02 | -.01 | -.01 | -.01 | -.01 | -.01 | -.01 |   |   |
| Dec                 | .07 | .06     | .05 | .04  | .08 | .07 | .11 | .09    | .09 | .08      | .07 | .06         | .84  | .85 | .83     | .83 | .84  | .84 | .83    | .84      | .79 | .8              | .84 | .85     | -.03 | -.02 | -.01 | -.01   | -.04     | -.03 | -.06 | -.05 | -.04 | -.03 | -.03 | -.03 | -.02 |      |   |   |
| Jan                 | .1  | .1      | .07 | .07  | .12 | .11 | .16 | .14    | .13 | .13      | .1  | .1          | .95  | .95 | .95     | .95 | .95  | .95 | .92    | .92      | .91 | .91             | .95 | .95     | -.03 | -.03 | -.01 | -.01   | -.04     | -.04 | -.07 | -.06 | -.04 | -.04 | -.03 | -.03 | -.03 |      |   |   |
| Feb                 | .13 | .14     | .08 | .09  | .15 | .17 | .18 | .2     | .18 | .2       | .13 | .14         | .95  | .95 | .95     | .95 | .95  | .95 | .93    | .93      | .91 | .91             | .95 | .95     | .02  | .04  | .01  | .02    | .03      | .05  | .02  | .05  | .03  | .06  | .02  | .04  |      |      |   |   |
| Mar                 | .15 | .17     | .09 | .11  | .18 | .2  | .22 | .26    | .2  | .23      | .15 | .17         | .96  | .96 | .96     | .96 | .95  | .96 | .93    | .94      | .93 | .93             | .96 | .96     | .05  | .07  | .02  | .03    | .07      | .1   | .09  | .14  | .09  | .12  | .05  | .07  |      |      |   |   |
| Apr                 | .19 | .2      | .11 | .12  | .22 | .23 | .29 | .31    | .24 | .25      | .19 | .2          | .95  | .96 | .96     | .96 | .95  | .95 | .93    | .94      | .93 | .93             | .95 | .96     | .07  | .07  | .03  | .03    | .09      | .09  | .14  | .15  | .12  | .11  | .07  | .07  |      |      |   |   |
| May                 | .18 | .18     | .11 | .11  | .21 | .21 | .31 | .31    | .21 | .21      | .18 | .18         | .93  | .93 | .93     | .92 | .92  | .92 | .91    | .91      | .91 | .91             | .93 | .93     | .04  | .03  | .01  | .01    | .06      | .04  | .11  | .09  | .06  | .04  | .04  | .03  |      |      |   |   |

|     |     |     |     |     |     |     |     |     |     |     |     |     |     |     |     |     |     |     |     |     |     |     |     |     |     |      |   |   |     |      |      |      |      |      |     |      |   |
|-----|-----|-----|-----|-----|-----|-----|-----|-----|-----|-----|-----|-----|-----|-----|-----|-----|-----|-----|-----|-----|-----|-----|-----|-----|-----|------|---|---|-----|------|------|------|------|------|-----|------|---|
| Jun | .11 | .12 | .06 | .06 | .13 | .13 | .21 | .21 | .12 | .12 | .11 | .12 | .84 | .83 | .83 | .82 | .83 | .83 | .82 | .82 | .82 | .82 | .84 | .83 | .01 | -.01 | 0 | 0 | .01 | -.01 | .04  | -.01 | .01  | -.02 | .01 | -.01 |   |
| Jul | .04 | .04 | .02 | .02 | .04 | .05 | .08 | .09 | .04 | .04 | .04 | .04 | .72 | .69 | .71 | .68 | .72 | .69 | .71 | .69 | .69 | .66 | .72 | .7  | 0   | -.01 | 0 | 0 | 0   | -.01 | -.01 | -.02 | 0    | -.01 | 0   | -.01 |   |
| Aug | .02 | .02 | .01 | .01 | .02 | .02 | .04 | .04 | .01 | .02 | .02 | .02 | .66 | .62 | .66 | .62 | .66 | .62 | .67 | .63 | .61 | .57 | .67 | .62 | 0   | 0    | 0 | 0 | 0   | 0    | -.01 | -.01 | 0    | 0    | 0   | 0    |   |
| Sep | .01 | .01 | .01 | .01 | .01 | .01 | .02 | .03 | .01 | .01 | .01 | .01 | .67 | .64 | .68 | .64 | .66 | .63 | .69 | .66 | .6  | .56 | .67 | .64 | 0   | 0    | 0 | 0 | 0   | 0    | 0    | 0    | -.01 | 0    | 0   | 0    | 0 |

Table S3. Same as Table S2, but for Colorado.

| cnrm-esm2-1 Model |     |         |     |      |     |     |     |        |     |          |     |             |     |      |     |         |     |      |     |        |     |                 |     |     |      |      |     |         |      |      |      |        |      |          |      |      |      |
|-------------------|-----|---------|-----|------|-----|-----|-----|--------|-----|----------|-----|-------------|-----|------|-----|---------|-----|------|-----|--------|-----|-----------------|-----|-----|------|------|-----|---------|------|------|------|--------|------|----------|------|------|------|
| RMSE              |     |         |     |      |     |     |     |        |     |          |     | Correlation |     |      |     |         |     |      |     |        |     | Mean Difference |     |     |      |      |     |         |      |      |      |        |      |          |      |      |      |
| h<2k              |     | 2k<h<3k |     | h>3k |     | All |     | Forest |     | NoForest |     | All         |     | h<2k |     | 2k<h<3k |     | h>3k |     | Forest |     | NoForest        |     | All |      | h<2k |     | 2k<h<3k |      | h>3k |      | Forest |      | NoForest |      |      |      |
| 9                 | 100 | 9       | 100 | 9    | 100 | 9   | 100 | 9      | 100 | 9        | 100 | 9           | 100 | 9    | 100 | 9       | 100 | 9    | 100 | 9      | 100 | 9               | 100 | 9   | 100  | 9    | 100 | 9       | 100  | 9    | 100  | 9      | 100  | 9        | 100  |      |      |
| Oct               | .01 | .01     | 0   | 0    | .01 | .01 | .01 | .02    | .01 | .01      | .01 | .01         | .61 | .59  | .39 | .41     | .64 | .62  | .57 | .57    | .62 | .6              | .61 | .6  | 0    | 0    | 0   | 0       | 0    | 0    | 0    | 0      | 0    | 0        | 0    | 0    | 0    |
| Nov               | .03 | .03     | 0   | .01  | .02 | .02 | .03 | .03    | .03 | .03      | .03 | .03         | .78 | .77  | .56 | .55     | .79 | .77  | .76 | .76    | .79 | .77             | .78 | .77 | 0    | -.02 | 0   | 0       | 0    | -.01 | 0    | -.02   | 0    | -.02     | 0    | -.02 |      |
| Dec               | .06 | .05     | .01 | .01  | .05 | .04 | .07 | .06    | .06 | .05      | .06 | .05         | .84 | .85  | .83 | .83     | .86 | .86  | .83 | .84    | .83 | .85             | .84 | .86 | -.02 | -.01 | 0   | -.01    | -.01 | -.01 | -.02 | -.02   | -.02 | -.01     | -.02 | -.01 |      |
| Jan               | .09 | .06     | .02 | .02  | .07 | .05 | .1  | .07    | .09 | .06      | .09 | .06         | .86 | .85  | .8  | .81     | .86 | .86  | .85 | .84    | .83 | .83             | .86 | .85 | -.05 | 0    | 0   | 0       | -.03 | 0    | -.06 | 0      | -.05 | 0        | -.05 | 0    |      |
| Feb               | .09 | .08     | .03 | .03  | .08 | .07 | .1  | .08    | .09 | .08      | .09 | .08         | .85 | .85  | .81 | .83     | .85 | .86  | .84 | .84    | .82 | .83             | .85 | .85 | -.02 | .01  | .01 | 0       | -.01 | .01  | -.03 | .01    | -.02 | .01      | -.02 | .01  |      |
| Mar               | .1  | .09     | .03 | .03  | .09 | .08 | .11 | .1     | .1  | .09      | .1  | .09         | .86 | .87  | .88 | .9      | .87 | .88  | .84 | .85    | .84 | .85             | .86 | .87 | -.01 | -.01 | 0   | -.01    | 0    | -.01 | -.02 | -.01   | -.01 | 0        | -.01 | -.01 |      |
| Apr               | .13 | .12     | .03 | .03  | .12 | .1  | .14 | .13    | .13 | .12      | .13 | .12         | .88 | .89  | .89 | .91     | .89 | .9   | .86 | .87    | .87 | .88             | .88 | .89 | .01  | 0    | 0   | 0       | .01  | .01  | .01  | 0      | .02  | .01      | .01  | 0    |      |
| May               | .12 | .12     | .01 | .01  | .1  | .1  | .14 | .13    | .12 | .12      | .12 | .12         | .87 | .87  | .82 | .85     | .88 | .88  | .85 | .86    | .87 | .87             | .87 | .87 | -.01 | .03  | 0   | 0       | 0    | .02  | -.02 | .04    | 0    | .04      | -.01 | .03  |      |
| Jun               | .07 | .08     | 0   | 0    | .05 | .06 | .08 | .09    | .06 | .08      | .07 | .08         | .76 | .76  | .71 | .71     | .78 | .78  | .74 | .74    | .78 | .78             | .76 | .76 | 0    | -.01 | 0   | 0       | 0    | 0    | -.01 | -.01   | 0    | 0        | 0    | 0    | -.01 |
| Jul               | .02 | .05     | 0   | 0    | .02 | .04 | .03 | .06    | .02 | .05      | .02 | .05         | .62 | .56  | .27 | .29     | .65 | .58  | .58 | .54    | .63 | .57             | .62 | .56 | 0    | -.02 | 0   | 0       | 0    | -.01 | 0    | -.03   | 0    | -.02     | 0    | -.02 |      |
| Aug               | .01 | .04     | 0   | 0    | .01 | .03 | .01 | .04    | .01 | .04      | .01 | .04         | .6  | .44  | .21 | .13     | .63 | .46  | .55 | .41    | .6  | .43             | .6  | .44 | 0    | -.02 | 0   | 0       | 0    | -.01 | 0    | -.03   | 0    | -.02     | 0    | -.02 |      |
| Sep               | .01 | .02     | 0   | 0    | 0   | .02 | .01 | .02    | .01 | .02      | .01 | .02         | .59 | .46  | .16 | .14     | .63 | .49  | .54 | .43    | .58 | .45             | .6  | .46 | 0    | -.01 | 0   | 0       | 0    | -.01 | 0    | -.01   | 0    | -.01     | 0    | -.01 |      |

| ec_earth3_veg Model |     |         |     |      |     |     |     |        |     |          |     |             |     |      |     |         |     |      |     |        |     |                 |     |     |      |      |      |         |      |      |      |        |      |          |      |      |   |
|---------------------|-----|---------|-----|------|-----|-----|-----|--------|-----|----------|-----|-------------|-----|------|-----|---------|-----|------|-----|--------|-----|-----------------|-----|-----|------|------|------|---------|------|------|------|--------|------|----------|------|------|---|
| RMSE                |     |         |     |      |     |     |     |        |     |          |     | Correlation |     |      |     |         |     |      |     |        |     | Mean Difference |     |     |      |      |      |         |      |      |      |        |      |          |      |      |   |
| h<2k                |     | 2k<h<3k |     | h>3k |     | All |     | Forest |     | NoForest |     | All         |     | h<2k |     | 2k<h<3k |     | h>3k |     | Forest |     | NoForest        |     | All |      | h<2k |      | 2k<h<3k |      | h>3k |      | Forest |      | NoForest |      |      |   |
| 9                   | 100 | 9       | 100 | 9    | 100 | 9   | 100 | 9      | 100 | 9        | 100 | 9           | 100 | 9    | 100 | 9       | 100 | 9    | 100 | 9      | 100 | 9               | 100 | 9   | 100  | 9    | 100  | 9       | 100  | 9    | 100  | 9      | 100  | 9        | 100  |      |   |
| Oct                 | .01 | .01     | 0   | 0    | .01 | .01 | .01 | .01    | .01 | .01      | .01 | .01         | .56 | .63  | .42 | .36     | .59 | .65  | .53 | .6     | .58 | .63             | .56 | .63 | 0    | 0    | 0    | 0       | 0    | 0    | 0    | 0      | 0    | 0        | 0    | 0    | 0 |
| Nov                 | .03 | .07     | .01 | .02  | .02 | .06 | .03 | .08    | .03 | .07      | .03 | .07         | .76 | .71  | .54 | .48     | .77 | .71  | .75 | .7     | .77 | .7              | .76 | .71 | -.01 | -.05 | 0    | -.01    | -.01 | -.04 | -.01 | -.06   | -.01 | -.06     | -.01 | -.05 |   |
| Dec                 | .07 | .11     | .02 | .03  | .06 | .09 | .07 | .12    | .07 | .11      | .07 | .11         | .86 | .84  | .82 | .8      | .86 | .85  | .84 | .83    | .85 | .83             | .86 | .84 | -.04 | -.09 | -.01 | -.02    | -.04 | -.08 | -.05 | -.1    | -.05 | -.1      | -.04 | -.09 |   |
| Jan                 | .07 | .08     | .02 | .03  | .06 | .07 | .08 | .09    | .07 | .08      | .07 | .08         | .85 | .85  | .81 | .82     | .86 | .85  | .84 | .84    | .83 | .83             | .85 | .85 | -.03 | -.04 | 0    | 0       | -.02 | -.03 | -.04 | -.05   | -.03 | -.05     | -.03 | -.04 |   |
| Feb                 | .09 | .08     | .03 | .03  | .08 | .07 | .09 | .09    | .09 | .08      | .09 | .08         | .84 | .84  | .83 | .83     | .85 | .85  | .84 | .83    | .82 | .82             | .84 | .84 | .02  | .02  | .02  | .01     | .02  | .02  | .02  | .01    | .02  | .02      | .02  | .02  |   |
| Mar                 | .11 | .12     | .03 | .03  | .1  | .11 | .12 | .13    | .11 | .12      | .11 | .12         | .85 | .85  | .89 | .88     | .86 | .86  | .84 | .84    | .83 | .83             | .85 | .85 | .04  | .06  | 0    | 0       | .04  | .05  | .04  | .07    | .04  | .07      | .04  | .06  |   |
| Apr                 | .13 | .17     | .03 | .03  | .11 | .14 | .14 | .18    | .13 | .17      | .13 | .17         | .87 | .87  | .88 | .86     | .88 | .88  | .85 | .85    | .86 | .86             | .87 | .87 | .03  | .08  | 0    | -.01    | .03  | .05  | .03  | .1     | .04  | .09      | .03  | .08  |   |
| May                 | .13 | .17     | .02 | .02  | .11 | .14 | .14 | .19    | .13 | .17      | .13 | .17         | .87 | .86  | .8  | .76     | .87 | .87  | .85 | .84    | .86 | .86             | .87 | .86 | 0    | .05  | 0    | 0       | 0    | .03  | -.01 | .06    | 0    | .05      | 0    | .05  |   |
| Jun                 | .09 | .1      | 0   | 0    | .07 | .07 | .1  | .11    | .09 | .09      | .09 | .09         | .75 | .75  | .65 | .58     | .77 | .77  | .73 | .72    | .77 | .77             | .75 | .75 | 0    | .02  | 0    | 0       | 0    | .01  | 0    | .02    | .01  | .02      | 0    | .02  |   |
| Jul                 | .03 | .03     | 0   | 0    | .02 | .02 | .04 | .03    | .03 | .03      | .03 | .03         | .58 | .58  | .22 | .21     | .6  | .61  | .55 | .55    | .6  | .61             | .58 | .59 | 0    | 0    | 0    | 0       | 0    | 0    | 0    | 0      | 0    | 0        | 0    | 0    |   |
| Aug                 | .01 | .01     | 0   | 0    | .01 | .01 | .02 | .01    | .01 | .01      | .01 | .01         | .53 | .53  | .12 | .13     | .57 | .57  | .49 | .49    | .53 | .53             | .54 | .53 | 0    | 0    | 0    | 0       | 0    | 0    | 0    | 0      | 0    | 0        | 0    | 0    |   |
| Sep                 | .01 | .01     | 0   | 0    | .01 | .01 | .01 | .01    | .01 | .01      | .01 | .01         | .54 | .54  | .15 | .12     | .58 | .58  | .49 | .5     | .54 | .54             | .54 | .54 | 0    | 0    | 0    | 0       | 0    | 0    | 0    | 0      | 0    | 0        | 0    | 0    | 0 |

| mpi-esm1-2 Model |     |         |     |      |     |     |     |        |     |          |     |             |     |      |     |         |     |      |     |        |     |                 |     |     |     |      |     |         |     |      |     |        |     |          |     |      |
|------------------|-----|---------|-----|------|-----|-----|-----|--------|-----|----------|-----|-------------|-----|------|-----|---------|-----|------|-----|--------|-----|-----------------|-----|-----|-----|------|-----|---------|-----|------|-----|--------|-----|----------|-----|------|
| RMSE             |     |         |     |      |     |     |     |        |     |          |     | Correlation |     |      |     |         |     |      |     |        |     | Mean Difference |     |     |     |      |     |         |     |      |     |        |     |          |     |      |
| h<2k             |     | 2k<h<3k |     | h>3k |     | All |     | Forest |     | NoForest |     | All         |     | h<2k |     | 2k<h<3k |     | h>3k |     | Forest |     | NoForest        |     | All |     | h<2k |     | 2k<h<3k |     | h>3k |     | Forest |     | NoForest |     |      |
| 9                | 100 | 9       | 100 | 9    | 100 | 9   | 100 | 9      | 100 | 9        | 100 | 9           | 100 | 9    | 100 | 9       | 100 | 9    | 100 | 9      | 100 | 9               | 100 | 9   | 100 | 9    | 100 | 9       | 100 | 9    | 100 | 9      | 100 | 9        | 100 |      |
| Oct              | .01 | .01     | 0   | 0    | .01 | .01 | .01 | .01    | .01 | .01      | .01 | .01         | .6  | .61  | .39 | .4      | .63 | .64  | .57 | .57    | .62 | .6              | .61 | .61 | 0   | 0    | 0   | 0       | 0   | 0    | 0   | 0      | 0   | 0        | 0   | 0    |
| Nov              | .02 | .03     | 0   | .01  | .02 | .03 | .03 | .04    | .02 | .03      | .02 | .03         | .77 | .76  | .56 | .51     | .78 | .76  | .75 | .74    | .78 | .76             | .77 | .76 | 0   | -.02 | 0   | -.01    | 0   | -.01 | 0   | -.02   | 0   | -.02     | 0   | -.02 |

|            |     |     |     |     |     |     |     |     |     |     |     |     |     |     |     |     |     |     |     |     |     |     |     |     |     |     |     |     |     |     |     |     |     |     |     |     |
|------------|-----|-----|-----|-----|-----|-----|-----|-----|-----|-----|-----|-----|-----|-----|-----|-----|-----|-----|-----|-----|-----|-----|-----|-----|-----|-----|-----|-----|-----|-----|-----|-----|-----|-----|-----|-----|
| <b>Dec</b> | .06 | .05 | .01 | .02 | .05 | .04 | .07 | .05 | .06 | .05 | .06 | .05 | .86 | .85 | .82 | .78 | .87 | .86 | .84 | .84 | .85 | .84 | .86 | .85 | -02 | -02 | 0   | -01 | -01 | -02 | -02 | -03 | -02 | -03 | -02 | -02 |
| <b>Jan</b> | .07 | .06 | .02 | .02 | .06 | .05 | .08 | .06 | .07 | .06 | .07 | .06 | .85 | .85 | .81 | .77 | .86 | .86 | .84 | .84 | .83 | .83 | .85 | .85 | -03 | .01 | 0   | 0   | -02 | .01 | -03 | 0   | -03 | .01 | -03 | .01 |
| <b>Feb</b> | .09 | .1  | .03 | .04 | .08 | .09 | .1  | .11 | .09 | .1  | .09 | .1  | .84 | .84 | .83 | .77 | .85 | .85 | .83 | .83 | .82 | .82 | .84 | .84 | .01 | .06 | .01 | .01 | .02 | .05 | .01 | .06 | .02 | .07 | .01 | .06 |
| <b>Mar</b> | .11 | .14 | .03 | .04 | .1  | .12 | .12 | .15 | .11 | .15 | .11 | .14 | .86 | .85 | .88 | .83 | .87 | .86 | .84 | .84 | .84 | .83 | .86 | .85 | .04 | .09 | 0   | 0   | .03 | .07 | .04 | .1  | .04 | .1  | .04 | .09 |
| <b>Apr</b> | .13 | .18 | .03 | .03 | .12 | .15 | .14 | .2  | .14 | .19 | .13 | .18 | .88 | .87 | .89 | .86 | .89 | .88 | .86 | .85 | .87 | .86 | .88 | .87 | .04 | .1  | 0   | -01 | .03 | .07 | .05 | .13 | .05 | .11 | .04 | .1  |
| <b>May</b> | .12 | .18 | .01 | .02 | .1  | .15 | .14 | .2  | .12 | .18 | .12 | .18 | .87 | .85 | .84 | .71 | .88 | .86 | .86 | .84 | .87 | .85 | .87 | .85 | .03 | .08 | 0   | 0   | .02 | .04 | .03 | .1  | .03 | .08 | .03 | .07 |
| <b>Jun</b> | .08 | .09 | 0   | 0   | .06 | .07 | .09 | .1  | .08 | .09 | .08 | .09 | .77 | .73 | .75 | .49 | .78 | .74 | .74 | .71 | .78 | .74 | .77 | .73 | -01 | .03 | 0   | 0   | 0   | .02 | -01 | .04 | 0   | .03 | -01 | .03 |
| <b>Jul</b> | .03 | .03 | 0   | 0   | .02 | .02 | .04 | .03 | .03 | .02 | .03 | .03 | .6  | .61 | .28 | .17 | .63 | .64 | .57 | .58 | .62 | .63 | .61 | .61 | -01 | 0   | 0   | 0   | 0   | 0   | -01 | 0   | 0   | 0   | -01 | 0   |
| <b>Aug</b> | .01 | .01 | 0   | 0   | .01 | .01 | .01 | .01 | .01 | .01 | .01 | .01 | .56 | .58 | .19 | .14 | .6  | .62 | .52 | .54 | .57 | .57 | .57 | .59 | 0   | 0   | 0   | 0   | 0   | 0   | 0   | 0   | 0   | 0   | 0   | 0   |
| <b>Sep</b> | .01 | .01 | 0   | 0   | 0   | .01 | .01 | .01 | .01 | .01 | .01 | .01 | .58 | .57 | .2  | .17 | .63 | .61 | .53 | .53 | .58 | .55 | .59 | .58 | 0   | 0   | 0   | 0   | 0   | 0   | 0   | 0   | 0   | 0   | 0   | 0   |

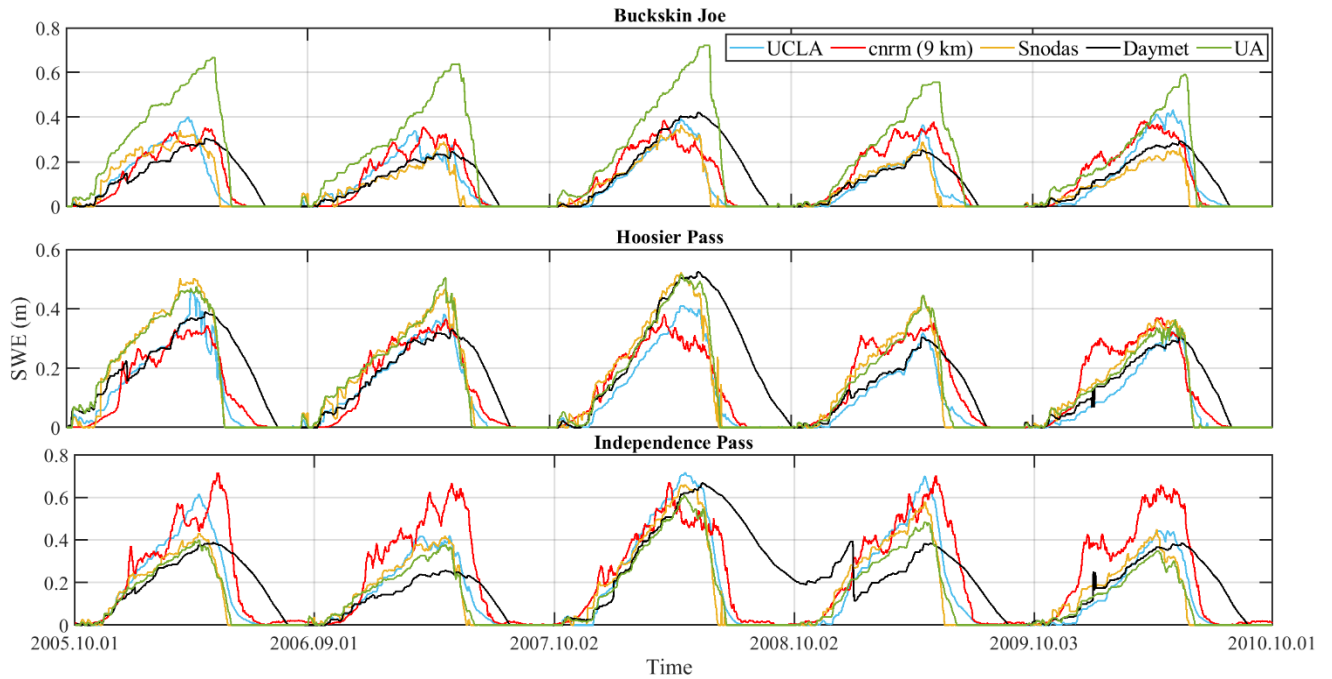

**Fig. S7.** The SWE time series spans a six-year period at the three highest elevations in-situ locations (Table 4) in Colorado. "UA" represents the University of Arizona SWE datasets. The downscaled SWE ( $\hat{SWE}$ ) results were obtained from the 'cnrm-esm2-1' climate data at a 9 km resolution.

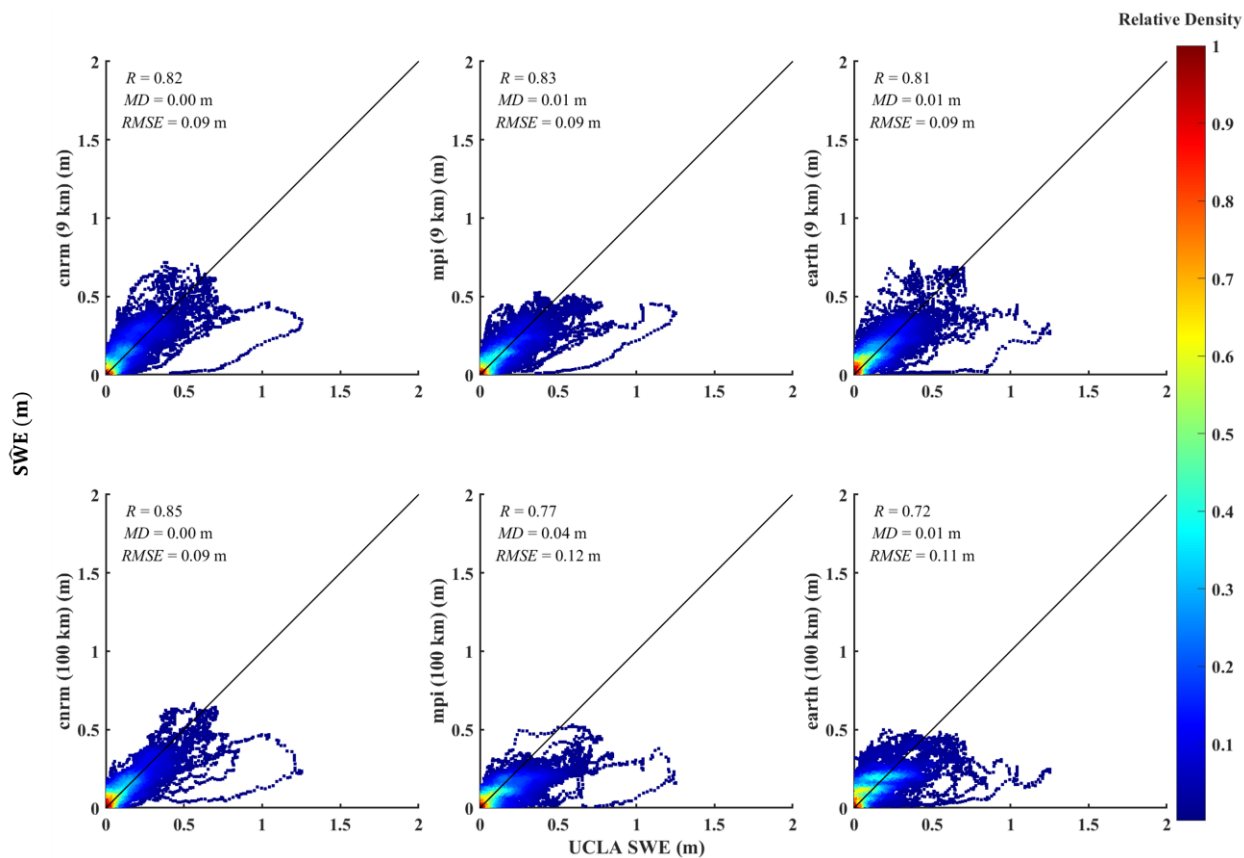

**Fig. S8.** A density scatter plot in Colorado from 2005 to 2010 compares in-situ data locations (Table 4) from UCLA SWE images to the downscaled SWE (SWE) values. The solid black line represents the 1:1 line. The displayed metrics include the correlation coefficient ( $R$ ), mean difference ( $MD$ ), and Root-Mean-Squared Error ( $RMSE$ ). Only data with SWE values greater than 1 cm are included in the comparison.



Cross validation: Colorado

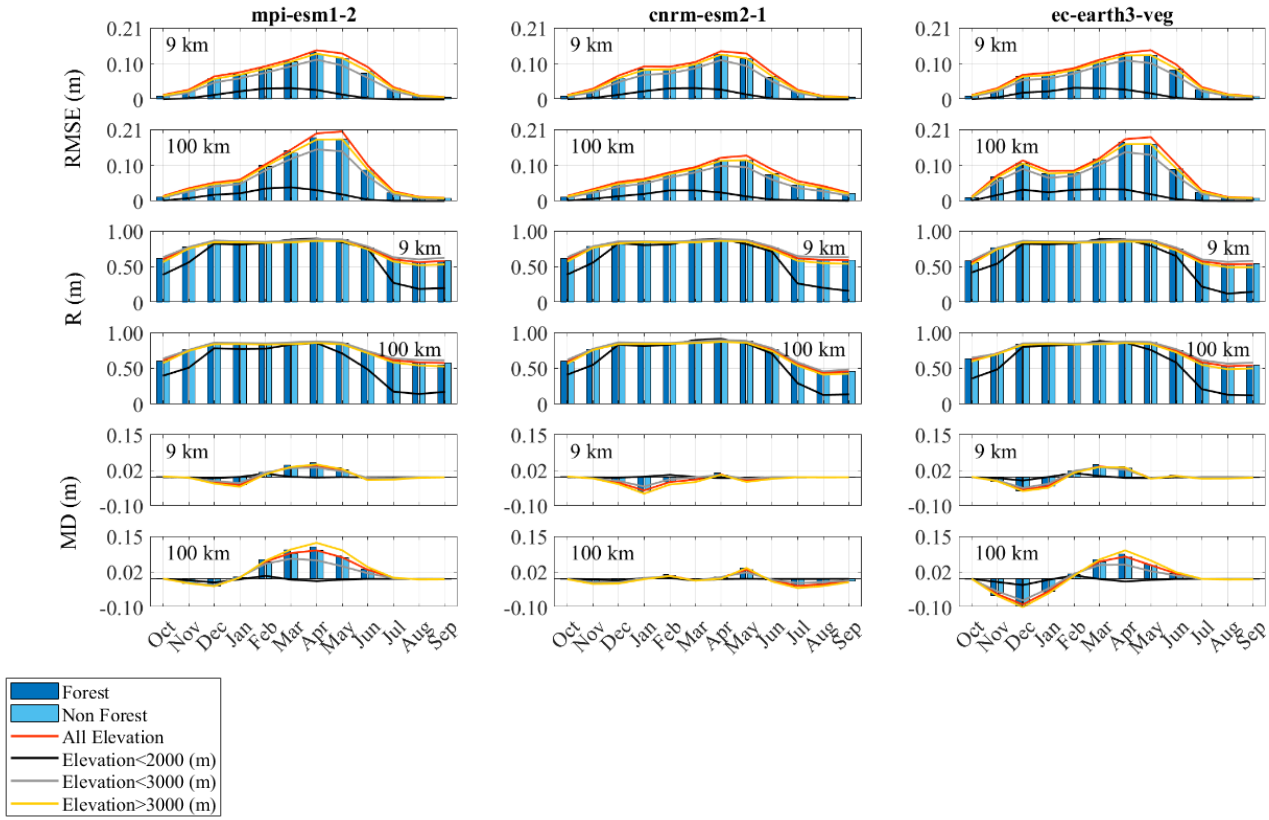

**Fig. S9.** Accuracy assessment of downscaling cross-validation, conducted in Colorado, over the six-year period from 2005 to 2010. Column titles indicate the results for downscaled SWE (SWE) using respective climate models as estimators. '9 km' and '100 km' refer to the resolutions of the climate data. The evaluation metrics include the Correlation Coefficient (R), Mean Difference (MD), and Root-Mean-Squared Error (RMSE). These metrics are considered in different elevation values and different land covers. In the legend, 2000 m < Elevation < 3000 m is shown as Elevation < 3000 m.

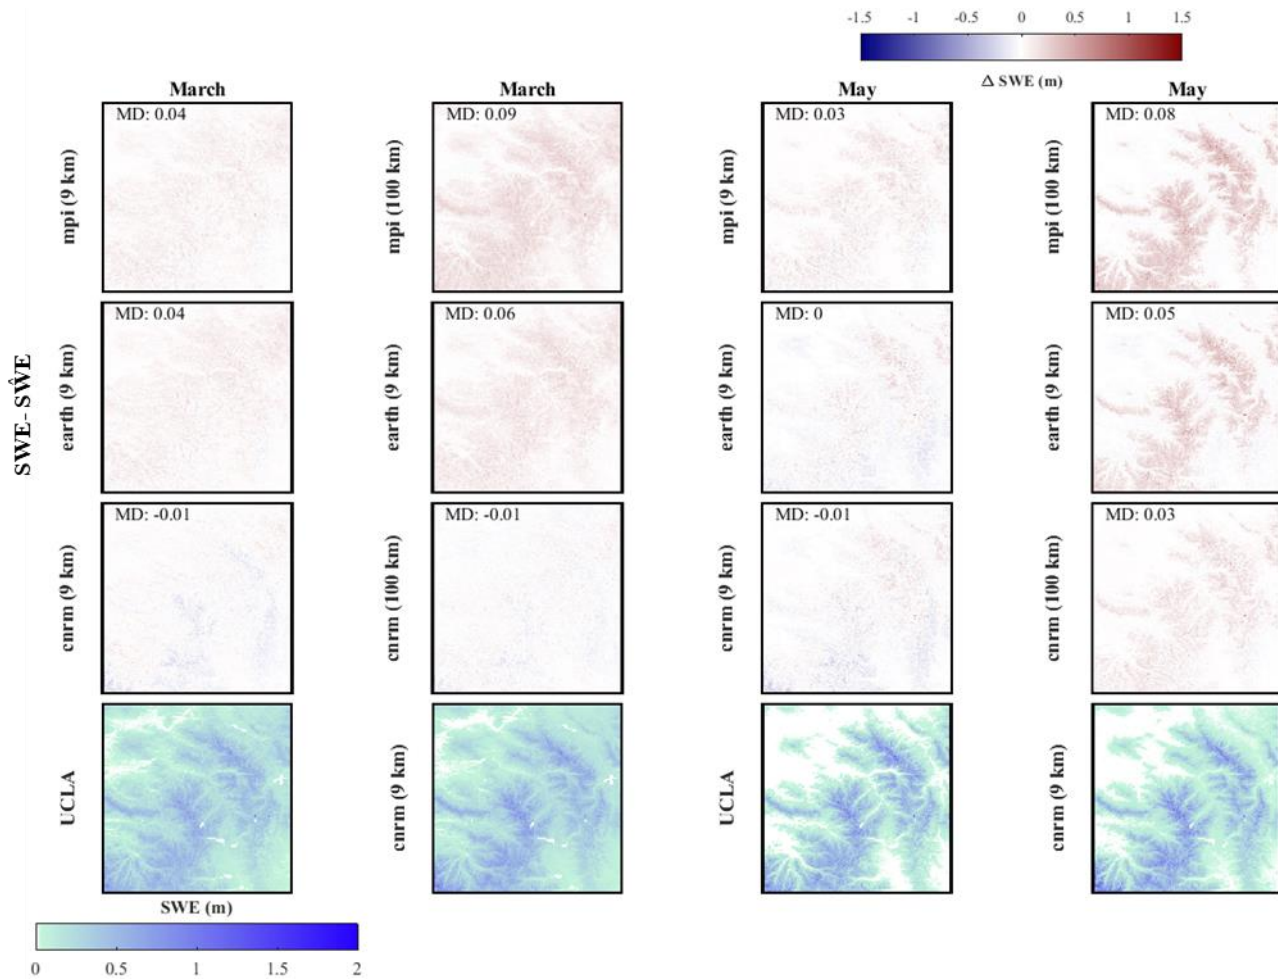

Fig. S10. Spatial assessment of the downscaling. The first three rows represent the mean difference between UCLA SWE and downscaled SWE ( $SWE - \hat{SWE}$ ) over Colorado throughout the 6-year testing period (2005-2010) for two different months (March and May). The last row represents the averaged reference SWE (UCLA SWE) or averaged downscaled SWE ( $\hat{SWE}$ ) throughout the 6-year testing period (2005-2010) for two different months (March and May). The evaluation metric includes Mean Difference (MD).

Table S4. Comparison of downscaled SWE (S $\hat{W}$ E) or UCLA SWE with 1 km SWE from the SNODAS Dataset over California (CA) and Colorado (CO). Metrics displayed include Correlation Coefficient (R), Mean Difference (MD), and Root-Mean-Squared Error (RMSE). Consideration is given only to swe values greater than 1 cm. 'Forest' denotes pixels with forest land cover, and 'NoForest' refers to non-forest pixels. The terms '9 km' and '100 km' indicate the resolutions of the climate data estimators.

| RMSE        | Elevation<2k    |        |        |               |               |        |        |            |            |        |        |      | UCLA SWE |      |
|-------------|-----------------|--------|--------|---------------|---------------|--------|--------|------------|------------|--------|--------|------|----------|------|
|             | cnrm-esm2-1     |        |        |               | ec-earth3-veg |        |        |            | mpi-esm1-2 |        |        |      |          |      |
|             | 9 km            |        | 100 km |               | 9 km          |        | 100 km |            | 9 km       |        | 100 km |      |          |      |
|             | CA              | CO     | CA     | CO            | CA            | CO     | CA     | CO         | CA         | CO     | CA     | CO   |          |      |
| Oct         | 0.01            | 0.01   | 0.01   | 0.01          | 0.01          | 0.01   | 0.01   | 0.01       | 0.01       | 0.01   | 0.01   | 0.01 | 0.01     | 0.01 |
| Nov         | 0.03            | 0.03   | 0.03   | 0.04          | 0.02          | 0.03   | 0.02   | 0.07       | 0.03       | 0.03   | 0.02   | 0.04 | 0.01     | 0.03 |
| Dec         | 0.09            | 0.07   | 0.10   | 0.06          | 0.08          | 0.07   | 0.08   | 0.11       | 0.09       | 0.07   | 0.08   | 0.06 | 0.05     | 0.05 |
| Jan         | 0.16            | 0.11   | 0.16   | 0.08          | 0.17          | 0.09   | 0.17   | 0.10       | 0.17       | 0.09   | 0.16   | 0.07 | 0.12     | 0.07 |
| Feb         | 0.20            | 0.12   | 0.20   | 0.10          | 0.22          | 0.11   | 0.23   | 0.10       | 0.22       | 0.11   | 0.23   | 0.11 | 0.17     | 0.10 |
| Mar         | 0.28            | 0.15   | 0.30   | 0.14          | 0.28          | 0.13   | 0.28   | 0.13       | 0.28       | 0.13   | 0.30   | 0.13 | 0.23     | 0.13 |
| Apr         | 0.39            | 0.19   | 0.40   | 0.19          | 0.36          | 0.17   | 0.37   | 0.17       | 0.37       | 0.18   | 0.38   | 0.17 | 0.29     | 0.19 |
| May         | 0.37            | 0.22   | 0.37   | 0.18          | 0.36          | 0.20   | 0.36   | 0.18       | 0.37       | 0.20   | 0.37   | 0.18 | 0.30     | 0.21 |
| Jun         | 0.25            | 0.10   | 0.24   | 0.11          | 0.24          | 0.10   | 0.25   | 0.08       | 0.25       | 0.12   | 0.25   | 0.07 | 0.22     | 0.10 |
| Jul         | 0.08            | 0.02   | 0.08   | 0.06          | 0.09          | 0.03   | 0.08   | 0.02       | 0.08       | 0.03   | 0.09   | 0.01 | 0.08     | 0.02 |
| Aug         | 0.02            | 0.01   | 0.02   | 0.04          | 0.02          | 0.01   | 0.02   | 0.01       | 0.02       | 0.01   | 0.03   | 0.01 | 0.02     | 0.01 |
| Sep         | 0.01            | 0.01   | 0.01   | 0.02          | 0.01          | 0.01   | 0.01   | 0.01       | 0.01       | 0.01   | 0.01   | 0.01 | 0.01     | 0.00 |
| RMSE        | 2k<Elevation<3k |        |        |               |               |        |        |            |            |        |        |      | UCLA SWE |      |
| cnrm-esm2-1 |                 |        |        | ec-earth3-veg |               |        |        | mpi-esm1-2 |            |        |        |      |          |      |
| 9 km        |                 | 100 km |        | 9 km          |               | 100 km |        | 9 km       |            | 100 km |        |      |          |      |
| CA          | CO              | CA     | CO     | CA            | CO            | CA     | CO     | CA         | CO         | CA     | CO     | CA   |          |      |
| Oct         | 0.00            | 0.00   | 0.00   | 0.00          | 0.00          | 0.00   | 0.00   | 0.00       | 0.00       | 0.00   | 0.00   | 0.00 | 0.00     | 0.00 |
| Nov         | 0.02            | 0.01   | 0.02   | 0.01          | 0.01          | 0.01   | 0.01   | 0.02       | 0.02       | 0.01   | 0.01   | 0.01 | 0.01     | 0.00 |
| Dec         | 0.06            | 0.03   | 0.06   | 0.02          | 0.05          | 0.03   | 0.05   | 0.04       | 0.06       | 0.03   | 0.05   | 0.03 | 0.04     | 0.02 |
| Jan         | 0.10            | 0.05   | 0.10   | 0.05          | 0.11          | 0.05   | 0.11   | 0.05       | 0.11       | 0.05   | 0.10   | 0.04 | 0.08     | 0.04 |
| Feb         | 0.13            | 0.06   | 0.13   | 0.06          | 0.15          | 0.06   | 0.15   | 0.06       | 0.15       | 0.06   | 0.15   | 0.06 | 0.12     | 0.06 |
| Mar         | 0.19            | 0.06   | 0.20   | 0.07          | 0.18          | 0.06   | 0.19   | 0.05       | 0.19       | 0.06   | 0.20   | 0.05 | 0.16     | 0.06 |
| Apr         | 0.25            | 0.05   | 0.25   | 0.05          | 0.23          | 0.04   | 0.24   | 0.04       | 0.24       | 0.04   | 0.24   | 0.04 | 0.19     | 0.05 |
| May         | 0.23            | 0.02   | 0.23   | 0.01          | 0.22          | 0.03   | 0.22   | 0.02       | 0.22       | 0.01   | 0.22   | 0.02 | 0.19     | 0.02 |
| Jun         | 0.14            | 0.00   | 0.13   | 0.00          | 0.13          | 0.00   | 0.14   | 0.00       | 0.14       | 0.00   | 0.14   | 0.00 | 0.12     | 0.00 |
| Jul         | 0.04            | 0.00   | 0.04   | 0.00          | 0.04          | 0.00   | 0.04   | 0.00       | 0.04       | 0.00   | 0.05   | 0.00 | 0.04     | 0.00 |
| Aug         | 0.01            | 0.00   | 0.01   | 0.00          | 0.01          | 0.00   | 0.01   | 0.00       | 0.01       | 0.00   | 0.01   | 0.00 | 0.01     | 0.00 |
| Sep         | 0.00            | 0.00   | 0.00   | 0.00          | 0.00          | 0.00   | 0.00   | 0.00       | 0.00       | 0.00   | 0.01   | 0.00 | 0.00     | 0.00 |
| RMSE        | Elevation>3k    |        |        |               |               |        |        |            |            |        |        |      | UCLA SWE |      |
| cnrm-esm2-1 |                 |        |        | ec-earth3-veg |               |        |        | mpi-esm1-2 |            |        |        |      |          |      |
| 9 km        |                 | 100 km |        | 9 km          |               | 100 km |        | 9 km       |            | 100 km |        |      |          |      |
| CA          | CO              | CA     | CO     | CA            | CO            | CA     | CO     | CA         | CO         | CA     | CO     | CA   |          |      |
| Oct         | 0.01            | 0.01   | 0.01   | 0.01          | 0.01          | 0.01   | 0.01   | 0.01       | 0.01       | 0.01   | 0.01   | 0.01 | 0.01     | 0.01 |
| Nov         | 0.04            | 0.02   | 0.03   | 0.03          | 0.03          | 0.03   | 0.02   | 0.06       | 0.03       | 0.02   | 0.03   | 0.03 | 0.01     | 0.02 |
| Dec         | 0.11            | 0.06   | 0.12   | 0.05          | 0.09          | 0.06   | 0.09   | 0.10       | 0.10       | 0.06   | 0.09   | 0.05 | 0.05     | 0.05 |
| Jan         | 0.18            | 0.09   | 0.18   | 0.07          | 0.19          | 0.08   | 0.20   | 0.09       | 0.19       | 0.08   | 0.19   | 0.07 | 0.14     | 0.07 |
| Feb         | 0.23            | 0.10   | 0.23   | 0.09          | 0.26          | 0.09   | 0.27   | 0.09       | 0.25       | 0.09   | 0.27   | 0.09 | 0.19     | 0.09 |
| Mar         | 0.32            | 0.13   | 0.34   | 0.13          | 0.31          | 0.12   | 0.31   | 0.11       | 0.32       | 0.12   | 0.34   | 0.12 | 0.26     | 0.13 |
| Apr         | 0.44            | 0.17   | 0.46   | 0.16          | 0.41          | 0.15   | 0.42   | 0.14       | 0.42       | 0.16   | 0.43   | 0.15 | 0.32     | 0.17 |

|             |                    |           |               |           |                      |           |               |           |                   |           |               |           |                 |           |
|-------------|--------------------|-----------|---------------|-----------|----------------------|-----------|---------------|-----------|-------------------|-----------|---------------|-----------|-----------------|-----------|
| May         | 0.43               | 0.17      | 0.43          | 0.15      | 0.42                 | 0.16      | 0.42          | 0.14      | 0.43              | 0.16      | 0.42          | 0.14      | 0.34            | 0.17      |
| Jun         | 0.29               | 0.08      | 0.28          | 0.08      | 0.28                 | 0.07      | 0.29          | 0.06      | 0.29              | 0.09      | 0.29          | 0.05      | 0.25            | 0.08      |
| Jul         | 0.10               | 0.01      | 0.10          | 0.04      | 0.10                 | 0.02      | 0.10          | 0.01      | 0.10              | 0.02      | 0.11          | 0.01      | 0.09            | 0.02      |
| Aug         | 0.03               | 0.00      | 0.03          | 0.03      | 0.02                 | 0.01      | 0.03          | 0.01      | 0.03              | 0.01      | 0.03          | 0.01      | 0.02            | 0.00      |
| Sep         | 0.01               | 0.00      | 0.01          | 0.02      | 0.01                 | 0.01      | 0.01          | 0.01      | 0.01              | 0.00      | 0.01          | 0.01      | 0.01            | 0.00      |
| <b>RMSE</b> | <b>Forest</b>      |           |               |           |                      |           |               |           |                   |           |               |           |                 |           |
|             | <b>cnrm-esm2-1</b> |           |               |           | <b>ec-earth3-veg</b> |           |               |           | <b>mpi-esm1-2</b> |           |               |           | <b>UCLA SWE</b> |           |
|             | <b>9 km</b>        |           | <b>100 km</b> |           | <b>9 km</b>          |           | <b>100 km</b> |           | <b>9 km</b>       |           | <b>100 km</b> |           | <b>CA</b>       | <b>CO</b> |
|             | <b>CA</b>          | <b>CO</b> | <b>CA</b>     | <b>CO</b> | <b>CA</b>            | <b>CO</b> | <b>CA</b>     | <b>CO</b> | <b>CA</b>         | <b>CO</b> | <b>CA</b>     | <b>CO</b> | <b>CA</b>       | <b>CO</b> |
| Oct         | 0.01               | 0.01      | 0.01          | 0.01      | 0.00                 | 0.01      | 0.00          | 0.01      | 0.01              | 0.01      | 0.01          | 0.01      | 0.00            | 0.01      |
| Nov         | 0.04               | 0.03      | 0.03          | 0.04      | 0.02                 | 0.03      | 0.02          | 0.07      | 0.03              | 0.03      | 0.03          | 0.04      | 0.01            | 0.03      |
| Dec         | 0.11               | 0.07      | 0.12          | 0.06      | 0.10                 | 0.07      | 0.09          | 0.12      | 0.11              | 0.08      | 0.10          | 0.06      | 0.06            | 0.05      |
| Jan         | 0.19               | 0.11      | 0.20          | 0.08      | 0.21                 | 0.09      | 0.22          | 0.10      | 0.21              | 0.09      | 0.20          | 0.08      | 0.15            | 0.08      |
| Feb         | 0.27               | 0.12      | 0.27          | 0.10      | 0.30                 | 0.11      | 0.31          | 0.11      | 0.30              | 0.11      | 0.31          | 0.11      | 0.22            | 0.10      |
| Mar         | 0.36               | 0.15      | 0.38          | 0.14      | 0.35                 | 0.14      | 0.36          | 0.13      | 0.37              | 0.13      | 0.38          | 0.14      | 0.30            | 0.13      |
| Apr         | 0.47               | 0.19      | 0.48          | 0.19      | 0.44                 | 0.18      | 0.45          | 0.17      | 0.45              | 0.19      | 0.46          | 0.18      | 0.35            | 0.19      |
| May         | 0.40               | 0.22      | 0.40          | 0.19      | 0.39                 | 0.21      | 0.39          | 0.19      | 0.39              | 0.21      | 0.39          | 0.19      | 0.33            | 0.22      |
| Jun         | 0.22               | 0.10      | 0.21          | 0.10      | 0.21                 | 0.10      | 0.22          | 0.07      | 0.22              | 0.12      | 0.23          | 0.06      | 0.19            | 0.10      |
| Jul         | 0.06               | 0.02      | 0.06          | 0.06      | 0.06                 | 0.02      | 0.06          | 0.02      | 0.06              | 0.03      | 0.07          | 0.01      | 0.06            | 0.02      |
| Aug         | 0.02               | 0.00      | 0.02          | 0.04      | 0.02                 | 0.01      | 0.02          | 0.01      | 0.02              | 0.01      | 0.02          | 0.01      | 0.01            | 0.00      |
| Sep         | 0.01               | 0.00      | 0.01          | 0.02      | 0.01                 | 0.01      | 0.01          | 0.01      | 0.01              | 0.00      | 0.01          | 0.01      | 0.00            | 0.00      |
| <b>RMSE</b> | <b>NoForest</b>    |           |               |           |                      |           |               |           |                   |           |               |           |                 |           |
|             | <b>cnrm-esm2-1</b> |           |               |           | <b>ec-earth3-veg</b> |           |               |           | <b>mpi-esm1-2</b> |           |               |           | <b>UCLA SWE</b> |           |
|             | <b>9 km</b>        |           | <b>100 km</b> |           | <b>9 km</b>          |           | <b>100 km</b> |           | <b>9 km</b>       |           | <b>100 km</b> |           | <b>CA</b>       | <b>CO</b> |
|             | <b>CA</b>          | <b>CO</b> | <b>CA</b>     | <b>CO</b> | <b>CA</b>            | <b>CO</b> | <b>CA</b>     | <b>CO</b> | <b>CA</b>         | <b>CO</b> | <b>CA</b>     | <b>CO</b> | <b>CA</b>       | <b>CO</b> |
| Oct         | 0.01               | 0.01      | 0.01          | 0.01      | 0.01                 | 0.01      | 0.01          | 0.01      | 0.01              | 0.01      | 0.01          | 0.01      | 0.01            | 0.01      |
| Nov         | 0.03               | 0.03      | 0.03          | 0.04      | 0.02                 | 0.03      | 0.02          | 0.07      | 0.03              | 0.03      | 0.02          | 0.04      | 0.01            | 0.03      |
| Dec         | 0.09               | 0.07      | 0.10          | 0.06      | 0.08                 | 0.07      | 0.08          | 0.11      | 0.09              | 0.07      | 0.08          | 0.06      | 0.05            | 0.05      |
| Jan         | 0.16               | 0.11      | 0.16          | 0.08      | 0.17                 | 0.09      | 0.17          | 0.10      | 0.17              | 0.09      | 0.16          | 0.07      | 0.12            | 0.07      |
| Feb         | 0.20               | 0.12      | 0.20          | 0.10      | 0.22                 | 0.11      | 0.23          | 0.10      | 0.22              | 0.11      | 0.23          | 0.11      | 0.17            | 0.10      |
| Mar         | 0.28               | 0.15      | 0.29          | 0.14      | 0.27                 | 0.13      | 0.28          | 0.13      | 0.28              | 0.13      | 0.30          | 0.13      | 0.23            | 0.13      |
| Apr         | 0.38               | 0.19      | 0.40          | 0.19      | 0.36                 | 0.17      | 0.36          | 0.17      | 0.37              | 0.18      | 0.37          | 0.17      | 0.28            | 0.19      |
| May         | 0.37               | 0.22      | 0.37          | 0.18      | 0.36                 | 0.20      | 0.36          | 0.18      | 0.37              | 0.20      | 0.36          | 0.18      | 0.30            | 0.21      |
| Jun         | 0.25               | 0.10      | 0.24          | 0.11      | 0.24                 | 0.10      | 0.25          | 0.08      | 0.25              | 0.12      | 0.25          | 0.07      | 0.22            | 0.10      |
| Jul         | 0.08               | 0.02      | 0.08          | 0.06      | 0.09                 | 0.03      | 0.08          | 0.02      | 0.09              | 0.03      | 0.09          | 0.01      | 0.08            | 0.02      |
| Aug         | 0.02               | 0.01      | 0.02          | 0.04      | 0.02                 | 0.01      | 0.02          | 0.01      | 0.02              | 0.01      | 0.03          | 0.01      | 0.02            | 0.01      |
| Sep         | 0.01               | 0.01      | 0.01          | 0.02      | 0.01                 | 0.01      | 0.01          | 0.01      | 0.01              | 0.01      | 0.01          | 0.01      | 0.01            | 0.00      |
| <b>RMSE</b> | <b>All</b>         |           |               |           |                      |           |               |           |                   |           |               |           |                 |           |
|             | <b>cnrm-esm2-1</b> |           |               |           | <b>ec-earth3-veg</b> |           |               |           | <b>mpi-esm1-2</b> |           |               |           | <b>UCLA SWE</b> |           |
|             | <b>9 km</b>        |           | <b>100 km</b> |           | <b>9 km</b>          |           | <b>100 km</b> |           | <b>9 km</b>       |           | <b>100 km</b> |           | <b>CA</b>       | <b>CO</b> |
|             | <b>CA</b>          | <b>CO</b> | <b>CA</b>     | <b>CO</b> | <b>CA</b>            | <b>CO</b> | <b>CA</b>     | <b>CO</b> | <b>CA</b>         | <b>CO</b> | <b>CA</b>     | <b>CO</b> | <b>CA</b>       | <b>CO</b> |
| Oct         | 0.01               | 0.01      | 0.02          | 0.02      | 0.02                 | 0.01      | 0.02          | 0.01      | 0.02              | 0.01      | 0.02          | 0.01      | 0.02            | 0.01      |
| Nov         | 0.05               | 0.04      | 0.05          | 0.04      | 0.04                 | 0.04      | 0.04          | 0.08      | 0.05              | 0.03      | 0.04          | 0.04      | 0.02            | 0.03      |
| Dec         | 0.14               | 0.08      | 0.15          | 0.06      | 0.12                 | 0.08      | 0.11          | 0.12      | 0.13              | 0.08      | 0.11          | 0.06      | 0.07            | 0.06      |
| Jan         | 0.23               | 0.11      | 0.23          | 0.08      | 0.25                 | 0.10      | 0.25          | 0.11      | 0.24              | 0.10      | 0.23          | 0.08      | 0.17            | 0.08      |
| Feb         | 0.28               | 0.12      | 0.28          | 0.11      | 0.32                 | 0.11      | 0.33          | 0.11      | 0.31              | 0.11      | 0.33          | 0.11      | 0.23            | 0.10      |
| Mar         | 0.39               | 0.15      | 0.42          | 0.14      | 0.39                 | 0.14      | 0.39          | 0.13      | 0.40              | 0.14      | 0.43          | 0.14      | 0.31            | 0.14      |

|          |                              |           |               |           |                      |           |               |           |                   |           |               |           |                 |           |
|----------|------------------------------|-----------|---------------|-----------|----------------------|-----------|---------------|-----------|-------------------|-----------|---------------|-----------|-----------------|-----------|
| Apr      | 0.56                         | 0.20      | 0.59          | 0.20      | 0.52                 | 0.18      | 0.53          | 0.18      | 0.53              | 0.19      | 0.55          | 0.19      | 0.39            | 0.20      |
| May      | 0.58                         | 0.24      | 0.59          | 0.21      | 0.57                 | 0.23      | 0.56          | 0.20      | 0.58              | 0.23      | 0.57          | 0.21      | 0.44            | 0.23      |
| Jun      | 0.42                         | 0.12      | 0.40          | 0.12      | 0.41                 | 0.11      | 0.42          | 0.09      | 0.42              | 0.14      | 0.42          | 0.08      | 0.36            | 0.12      |
| Jul      | 0.14                         | 0.02      | 0.14          | 0.07      | 0.15                 | 0.03      | 0.14          | 0.02      | 0.15              | 0.04      | 0.16          | 0.02      | 0.13            | 0.02      |
| Aug      | 0.04                         | 0.01      | 0.04          | 0.04      | 0.04                 | 0.01      | 0.04          | 0.01      | 0.04              | 0.01      | 0.05          | 0.01      | 0.03            | 0.01      |
| Sep      | 0.02                         | 0.01      | 0.02          | 0.02      | 0.02                 | 0.01      | 0.02          | 0.01      | 0.02              | 0.01      | 0.02          | 0.01      | 0.01            | 0.00      |
| <b>R</b> | <b>Elevation&lt;2k</b>       |           |               |           |                      |           |               |           |                   |           |               |           |                 |           |
|          | <b>cnrm-esm2-1</b>           |           |               |           | <b>ec-earth3-veg</b> |           |               |           | <b>mpi-esm1-2</b> |           |               |           | <b>UCLA SWE</b> |           |
|          | <b>9 km</b>                  |           | <b>100 km</b> |           | <b>9 km</b>          |           | <b>100 km</b> |           | <b>9 km</b>       |           | <b>100 km</b> |           | <b>CA</b>       | <b>CO</b> |
|          | <b>CA</b>                    | <b>CO</b> | <b>CA</b>     | <b>CO</b> | <b>CA</b>            | <b>CO</b> | <b>CA</b>     | <b>CO</b> | <b>CA</b>         | <b>CO</b> | <b>CA</b>     | <b>CO</b> | <b>CA</b>       | <b>CO</b> |
| Oct      | -0.09                        | NaN       | -0.07         | 0.04      | -0.07                | NaN       | -0.05         | NaN       | -0.03             | NaN       | -0.09         | NaN       | 0.07            | 0.53      |
| Nov      | 0.02                         | 0.19      | 0.03          | 0.17      | -0.05                | 0.00      | -0.03         | -0.15     | 0.00              | 0.13      | -0.02         | -0.18     | 0.01            | 0.28      |
| Dec      | 0.57                         | -0.07     | 0.57          | -0.01     | 0.55                 | 0.02      | 0.56          | 0.07      | 0.56              | -0.06     | 0.56          | 0.07      | 0.54            | -0.05     |
| Jan      | 0.75                         | -0.12     | 0.75          | -0.06     | 0.71                 | -0.07     | 0.72          | -0.05     | 0.74              | -0.07     | 0.73          | -0.11     | 0.70            | -0.06     |
| Feb      | 0.75                         | -0.01     | 0.75          | 0.03      | 0.72                 | 0.01      | 0.72          | 0.03      | 0.72              | 0.02      | 0.72          | -0.08     | 0.69            | 0.06      |
| Mar      | 0.70                         | 0.03      | 0.70          | 0.12      | 0.69                 | 0.06      | 0.69          | 0.10      | 0.70              | 0.09      | 0.71          | 0.06      | 0.67            | 0.09      |
| Apr      | 0.49                         | 0.33      | 0.51          | 0.30      | 0.51                 | 0.29      | 0.49          | 0.33      | 0.49              | 0.24      | 0.52          | 0.28      | 0.48            | 0.21      |
| May      | 0.24                         | 0.31      | 0.23          | 0.37      | 0.23                 | 0.27      | 0.23          | 0.17      | 0.21              | 0.32      | 0.23          | 0.34      | 0.22            | 0.40      |
| Jun      | 0.04                         | NaN       | 0.04          | NaN       | 0.04                 | NaN       | 0.05          | NaN       | 0.04              | NaN       | 0.05          | NaN       | 0.04            | NaN       |
| Jul      | -0.10                        | NaN       | -0.08         | NaN       | -0.05                | NaN       | -0.07         | NaN       | -0.06             | NaN       | -0.07         | NaN       | -0.01           | NaN       |
| Aug      | -0.11                        | NaN       | -0.14         | NaN       | 0.06                 | NaN       | -0.23         | NaN       | -0.10             | NaN       | -0.11         | NaN       | -0.17           | NaN       |
| Sep      | 0.55                         | NaN       | 0.48          | NaN       | -0.59                | NaN       | 0.66          | NaN       | 0.50              | NaN       | 0.66          | NaN       | 0.79            | NaN       |
| <b>R</b> | <b>2k&lt;Elevation&lt;3k</b> |           |               |           |                      |           |               |           |                   |           |               |           |                 |           |
|          | <b>cnrm-esm2-1</b>           |           |               |           | <b>ec-earth3-veg</b> |           |               |           | <b>mpi-esm1-2</b> |           |               |           | <b>UCLA SWE</b> |           |
|          | <b>9 km</b>                  |           | <b>100 km</b> |           | <b>9 km</b>          |           | <b>100 km</b> |           | <b>9 km</b>       |           | <b>100 km</b> |           | <b>CA</b>       | <b>CO</b> |
|          | <b>CA</b>                    | <b>CO</b> | <b>CA</b>     | <b>CO</b> | <b>CA</b>            | <b>CO</b> | <b>CA</b>     | <b>CO</b> | <b>CA</b>         | <b>CO</b> | <b>CA</b>     | <b>CO</b> | <b>CA</b>       | <b>CO</b> |
| Oct      | -0.09                        | -0.01     | -0.07         | -0.02     | -0.07                | 0.06      | -0.07         | 0.05      | -0.02             | -0.02     | -0.07         | -0.01     | 0.10            | 0.07      |
| Nov      | 0.02                         | 0.12      | 0.02          | 0.15      | -0.07                | 0.15      | -0.05         | 0.21      | -0.02             | 0.09      | -0.04         | 0.15      | 0.01            | 0.10      |
| Dec      | 0.57                         | 0.50      | 0.56          | 0.53      | 0.54                 | 0.54      | 0.55          | 0.56      | 0.56              | 0.50      | 0.56          | 0.54      | 0.53            | 0.48      |
| Jan      | 0.70                         | 0.60      | 0.70          | 0.60      | 0.68                 | 0.60      | 0.68          | 0.60      | 0.70              | 0.60      | 0.69          | 0.60      | 0.67            | 0.58      |
| Feb      | 0.70                         | 0.61      | 0.70          | 0.60      | 0.68                 | 0.61      | 0.69          | 0.61      | 0.69              | 0.61      | 0.69          | 0.61      | 0.66            | 0.60      |
| Mar      | 0.68                         | 0.57      | 0.68          | 0.57      | 0.67                 | 0.57      | 0.67          | 0.57      | 0.68              | 0.57      | 0.69          | 0.57      | 0.66            | 0.55      |
| Apr      | 0.48                         | 0.41      | 0.49          | 0.41      | 0.49                 | 0.42      | 0.48          | 0.42      | 0.49              | 0.39      | 0.51          | 0.41      | 0.48            | 0.36      |
| May      | 0.24                         | 0.10      | 0.24          | 0.07      | 0.24                 | 0.11      | 0.24          | 0.12      | 0.22              | 0.07      | 0.23          | 0.09      | 0.23            | 0.07      |
| Jun      | 0.01                         | -0.02     | 0.01          | -0.03     | 0.01                 | -0.01     | 0.02          | -0.02     | 0.01              | -0.03     | 0.02          | -0.06     | -0.01           | -0.01     |
| Jul      | -0.14                        | -0.07     | -0.14         | 0.28      | -0.11                | 0.02      | -0.11         | -0.02     | -0.11             | 0.13      | -0.13         | -0.18     | -0.07           | -0.03     |
| Aug      | -0.17                        | NaN       | -0.16         | NaN       | 0.01                 | NaN       | -0.22         | NaN       | -0.23             | NaN       | -0.20         | NaN       | -0.16           | NaN       |
| Sep      | 0.57                         | 0.10      | 0.23          | 0.05      | -0.37                | 0.08      | 0.69          | 0.12      | 0.41              | 0.15      | 0.49          | 0.08      | 0.79            | -0.03     |
| <b>R</b> | <b>Elevation&gt;3k</b>       |           |               |           |                      |           |               |           |                   |           |               |           |                 |           |
|          | <b>cnrm-esm2-1</b>           |           |               |           | <b>ec-earth3-veg</b> |           |               |           | <b>mpi-esm1-2</b> |           |               |           | <b>UCLA SWE</b> |           |
|          | <b>9 km</b>                  |           | <b>100 km</b> |           | <b>9 km</b>          |           | <b>100 km</b> |           | <b>9 km</b>       |           | <b>100 km</b> |           | <b>CA</b>       | <b>CO</b> |
|          | <b>CA</b>                    | <b>CO</b> | <b>CA</b>     | <b>CO</b> | <b>CA</b>            | <b>CO</b> | <b>CA</b>     | <b>CO</b> | <b>CA</b>         | <b>CO</b> | <b>CA</b>     | <b>CO</b> | <b>CA</b>       | <b>CO</b> |
| Oct      | -0.10                        | 0.00      | -0.09         | -0.04     | -0.08                | 0.05      | -0.09         | 0.03      | -0.04             | -0.01     | -0.11         | -0.01     | 0.05            | 0.05      |
| Nov      | -0.01                        | 0.08      | 0.00          | 0.12      | -0.07                | 0.12      | -0.04         | 0.16      | -0.05             | 0.06      | -0.05         | 0.12      | -0.01           | 0.09      |
| Dec      | 0.54                         | 0.41      | 0.54          | 0.45      | 0.53                 | 0.45      | 0.53          | 0.46      | 0.54              | 0.42      | 0.54          | 0.45      | 0.49            | 0.40      |
| Jan      | 0.67                         | 0.53      | 0.67          | 0.51      | 0.66                 | 0.51      | 0.66          | 0.51      | 0.67              | 0.52      | 0.67          | 0.52      | 0.62            | 0.50      |
| Feb      | 0.67                         | 0.54      | 0.67          | 0.53      | 0.67                 | 0.53      | 0.67          | 0.53      | 0.67              | 0.54      | 0.67          | 0.53      | 0.62            | 0.53      |

|          |                    |           |               |           |                      |           |               |           |                   |           |               |           |                 |           |
|----------|--------------------|-----------|---------------|-----------|----------------------|-----------|---------------|-----------|-------------------|-----------|---------------|-----------|-----------------|-----------|
| Mar      | 0.67               | 0.52      | 0.67          | 0.52      | 0.67                 | 0.51      | 0.67          | 0.52      | 0.68              | 0.52      | 0.68          | 0.51      | 0.64            | 0.51      |
| Apr      | 0.51               | 0.41      | 0.52          | 0.41      | 0.52                 | 0.41      | 0.51          | 0.42      | 0.52              | 0.40      | 0.53          | 0.41      | 0.50            | 0.39      |
| May      | 0.21               | 0.08      | 0.22          | 0.06      | 0.22                 | 0.10      | 0.22          | 0.10      | 0.20              | 0.06      | 0.21          | 0.09      | 0.20            | 0.08      |
| Jun      | -0.06              | -0.03     | -0.06         | -0.05     | -0.06                | -0.02     | -0.05         | -0.03     | -0.05             | -0.04     | -0.05         | -0.05     | -0.07           | -0.01     |
| Jul      | -0.18              | -0.12     | -0.18         | 0.26      | -0.16                | -0.02     | -0.16         | -0.05     | -0.16             | 0.08      | -0.17         | -0.27     | -0.12           | 0.00      |
| Aug      | -0.15              | NaN       | -0.13         | NaN       | -0.04                | NaN       | -0.29         | NaN       | -0.11             | NaN       | -0.11         | NaN       | -0.22           | NaN       |
| Sep      | 0.65               | 0.08      | 0.60          | 0.05      | -0.36                | 0.06      | 0.75          | 0.13      | 0.62              | 0.09      | 0.74          | 0.02      | 0.78            | -0.02     |
| <b>R</b> | <b>Forest</b>      |           |               |           |                      |           |               |           |                   |           |               |           |                 |           |
|          | <b>cnrm-esm2-1</b> |           |               |           | <b>ec-earth3-veg</b> |           |               |           | <b>mpi-esm1-2</b> |           |               |           | <b>UCLA SWE</b> |           |
|          | <b>9 km</b>        |           | <b>100 km</b> |           | <b>9 km</b>          |           | <b>100 km</b> |           | <b>9 km</b>       |           | <b>100 km</b> |           | <b>CA</b>       | <b>CO</b> |
|          | <b>CA</b>          | <b>CO</b> | <b>CA</b>     | <b>CO</b> | <b>CA</b>            | <b>CO</b> | <b>CA</b>     | <b>CO</b> | <b>CA</b>         | <b>CO</b> | <b>CA</b>     | <b>CO</b> | <b>CA</b>       | <b>CO</b> |
| Oct      | 0.10               | -0.01     | 0.14          | -0.02     | 0.10                 | 0.06      | 0.19          | 0.05      | 0.02              | -0.01     | 0.04          | -0.02     | 0.01            | 0.07      |
| Nov      | 0.23               | 0.09      | 0.22          | 0.12      | 0.21                 | 0.13      | 0.19          | 0.17      | 0.25              | 0.08      | 0.23          | 0.13      | 0.17            | 0.10      |
| Dec      | 0.46               | 0.39      | 0.47          | 0.41      | 0.46                 | 0.42      | 0.46          | 0.43      | 0.45              | 0.39      | 0.46          | 0.41      | 0.44            | 0.38      |
| Jan      | 0.52               | 0.48      | 0.53          | 0.46      | 0.52                 | 0.46      | 0.53          | 0.46      | 0.54              | 0.47      | 0.54          | 0.45      | 0.52            | 0.45      |
| Feb      | 0.51               | 0.48      | 0.51          | 0.46      | 0.52                 | 0.47      | 0.51          | 0.47      | 0.51              | 0.48      | 0.51          | 0.46      | 0.52            | 0.46      |
| Mar      | 0.56               | 0.47      | 0.55          | 0.45      | 0.58                 | 0.46      | 0.56          | 0.45      | 0.56              | 0.46      | 0.57          | 0.44      | 0.56            | 0.45      |
| Apr      | 0.46               | 0.34      | 0.46          | 0.35      | 0.48                 | 0.34      | 0.46          | 0.33      | 0.46              | 0.33      | 0.47          | 0.33      | 0.45            | 0.32      |
| May      | 0.27               | 0.02      | 0.27          | 0.01      | 0.28                 | 0.03      | 0.28          | 0.02      | 0.26              | 0.00      | 0.27          | 0.01      | 0.25            | 0.01      |
| Jun      | 0.04               | -0.05     | 0.04          | -0.09     | 0.02                 | -0.07     | 0.02          | -0.06     | 0.04              | -0.06     | 0.06          | -0.06     | 0.04            | -0.05     |
| Jul      | -0.07              | -0.33     | -0.09         | 0.05      | -0.04                | -0.25     | -0.08         | -0.37     | -0.07             | -0.21     | -0.10         | -0.42     | -0.05           | -0.02     |
| Aug      | 0.24               | NaN       | 0.05          | NaN       | 0.14                 | NaN       | 0.17          | NaN       | -0.08             | NaN       | 0.16          | NaN       | 0.27            | NaN       |
| Sep      | -1.00              | 0.08      | -1.00         | 0.18      | -1.00                | 0.05      | 1.00          | 0.09      | -0.92             | -0.08     | -0.82         | -0.01     | 0.72            | -0.02     |
| <b>R</b> | <b>NoForest</b>    |           |               |           |                      |           |               |           |                   |           |               |           |                 |           |
|          | <b>cnrm-esm2-1</b> |           |               |           | <b>ec-earth3-veg</b> |           |               |           | <b>mpi-esm1-2</b> |           |               |           | <b>UCLA SWE</b> |           |
|          | <b>9 km</b>        |           | <b>100 km</b> |           | <b>9 km</b>          |           | <b>100 km</b> |           | <b>9 km</b>       |           | <b>100 km</b> |           | <b>CA</b>       | <b>CO</b> |
|          | <b>CA</b>          | <b>CO</b> | <b>CA</b>     | <b>CO</b> | <b>CA</b>            | <b>CO</b> | <b>CA</b>     | <b>CO</b> | <b>CA</b>         | <b>CO</b> | <b>CA</b>     | <b>CO</b> | <b>CA</b>       | <b>CO</b> |
| Oct      | -0.09              | 0.00      | -0.07         | -0.03     | -0.07                | 0.05      | -0.08         | 0.04      | -0.02             | -0.01     | -0.08         | -0.01     | 0.09            | 0.07      |
| Nov      | 0.02               | 0.10      | 0.02          | 0.14      | -0.07                | 0.13      | -0.05         | 0.19      | -0.02             | 0.08      | -0.04         | 0.14      | 0.01            | 0.10      |
| Dec      | 0.58               | 0.48      | 0.58          | 0.51      | 0.56                 | 0.52      | 0.56          | 0.53      | 0.57              | 0.48      | 0.57          | 0.51      | 0.54            | 0.46      |
| Jan      | 0.72               | 0.59      | 0.72          | 0.58      | 0.69                 | 0.58      | 0.70          | 0.58      | 0.72              | 0.58      | 0.71          | 0.58      | 0.68            | 0.57      |
| Feb      | 0.72               | 0.60      | 0.72          | 0.59      | 0.70                 | 0.59      | 0.70          | 0.59      | 0.71              | 0.60      | 0.71          | 0.59      | 0.68            | 0.58      |
| Mar      | 0.70               | 0.56      | 0.70          | 0.56      | 0.68                 | 0.57      | 0.68          | 0.57      | 0.70              | 0.56      | 0.70          | 0.56      | 0.67            | 0.55      |
| Apr      | 0.50               | 0.43      | 0.51          | 0.43      | 0.51                 | 0.43      | 0.50          | 0.44      | 0.50              | 0.41      | 0.52          | 0.43      | 0.49            | 0.39      |
| May      | 0.25               | 0.11      | 0.25          | 0.08      | 0.25                 | 0.12      | 0.25          | 0.13      | 0.23              | 0.08      | 0.24          | 0.11      | 0.24            | 0.09      |
| Jun      | 0.01               | -0.03     | 0.01          | -0.05     | 0.02                 | -0.02     | 0.03          | -0.02     | 0.02              | -0.03     | 0.03          | -0.06     | 0.00            | -0.01     |
| Jul      | -0.14              | -0.11     | -0.14         | 0.27      | -0.10                | -0.01     | -0.12         | -0.04     | -0.11             | 0.09      | -0.13         | -0.26     | -0.07           | -0.03     |
| Aug      | -0.16              | NaN       | -0.16         | NaN       | 0.00                 | NaN       | -0.23         | NaN       | -0.20             | NaN       | -0.18         | NaN       | -0.18           | NaN       |
| Sep      | 0.58               | 0.09      | 0.37          | 0.06      | -0.38                | 0.08      | 0.69          | 0.13      | 0.47              | 0.12      | 0.58          | 0.04      | 0.80            | -0.02     |
| <b>R</b> | <b>All</b>         |           |               |           |                      |           |               |           |                   |           |               |           |                 |           |
|          | <b>cnrm-esm2-1</b> |           |               |           | <b>ec-earth3-veg</b> |           |               |           | <b>mpi-esm1-2</b> |           |               |           | <b>UCLA SWE</b> |           |
|          | <b>9 km</b>        |           | <b>100 km</b> |           | <b>9 km</b>          |           | <b>100 km</b> |           | <b>9 km</b>       |           | <b>100 km</b> |           | <b>CA</b>       | <b>CO</b> |
|          | <b>CA</b>          | <b>CO</b> | <b>CA</b>     | <b>CO</b> | <b>CA</b>            | <b>CO</b> | <b>CA</b>     | <b>CO</b> | <b>CA</b>         | <b>CO</b> | <b>CA</b>     | <b>CO</b> | <b>CA</b>       | <b>CO</b> |
| Oct      | -0.09              | 0.00      | -0.07         | -0.03     | -0.07                | 0.05      | -0.08         | 0.04      | -0.02             | -0.01     | -0.08         | -0.01     | 0.09            | 0.07      |
| Nov      | 0.02               | 0.10      | 0.02          | 0.14      | -0.07                | 0.13      | -0.04         | 0.19      | -0.02             | 0.08      | -0.04         | 0.14      | 0.01            | 0.10      |
| Dec      | 0.57               | 0.47      | 0.57          | 0.51      | 0.55                 | 0.51      | 0.56          | 0.53      | 0.56              | 0.47      | 0.57          | 0.51      | 0.54            | 0.46      |
| Jan      | 0.72               | 0.59      | 0.72          | 0.58      | 0.69                 | 0.57      | 0.70          | 0.58      | 0.72              | 0.58      | 0.71          | 0.58      | 0.68            | 0.56      |

|     |                 |       |        |       |               |       |        |       |            |       |        |       |          |       |
|-----|-----------------|-------|--------|-------|---------------|-------|--------|-------|------------|-------|--------|-------|----------|-------|
| Feb | 0.72            | 0.59  | 0.72   | 0.58  | 0.70          | 0.59  | 0.70   | 0.59  | 0.71       | 0.59  | 0.70   | 0.58  | 0.68     | 0.58  |
| Mar | 0.69            | 0.56  | 0.69   | 0.56  | 0.68          | 0.56  | 0.68   | 0.56  | 0.69       | 0.56  | 0.70   | 0.56  | 0.67     | 0.54  |
| Apr | 0.50            | 0.43  | 0.51   | 0.43  | 0.51          | 0.43  | 0.50   | 0.44  | 0.50       | 0.41  | 0.52   | 0.43  | 0.49     | 0.39  |
| May | 0.25            | 0.10  | 0.25   | 0.08  | 0.25          | 0.12  | 0.25   | 0.12  | 0.23       | 0.07  | 0.24   | 0.10  | 0.24     | 0.09  |
| Jun | 0.02            | -0.03 | 0.02   | -0.05 | 0.02          | -0.02 | 0.03   | -0.02 | 0.02       | -0.04 | 0.03   | -0.06 | 0.00     | -0.01 |
| Jul | -0.14           | -0.11 | -0.14  | 0.27  | -0.10         | -0.01 | -0.11  | -0.04 | -0.11      | 0.09  | -0.12  | -0.25 | -0.07    | -0.03 |
| Aug | -0.16           | NaN   | -0.16  | NaN   | 0.00          | NaN   | -0.23  | NaN   | -0.20      | NaN   | -0.18  | NaN   | -0.18    | NaN   |
| Sep | 0.58            | 0.09  | 0.36   | 0.06  | -0.38         | 0.08  | 0.69   | 0.13  | 0.46       | 0.12  | 0.58   | 0.04  | 0.79     | -0.02 |
| MD  | Elevation<2k    |       |        |       |               |       |        |       |            |       |        |       |          |       |
|     | cnrm-esm2-1     |       |        |       | ec-earth3-veg |       |        |       | mpi-esm1-2 |       |        |       | UCLA SWE |       |
|     | 9 km            |       | 100 km |       | 9 km          |       | 100 km |       | 9 km       |       | 100 km |       | CA       | CO    |
|     | CA              | CO    | CA     | CO    | CA            | CO    | CA     | CO    | CA         | CO    | CA     | CO    | CA       | CO    |
| Oct | 0.00            | 0.00  | 0.00   | 0.00  | 0.00          | 0.00  | 0.00   | 0.00  | 0.00       | 0.00  | 0.00   | 0.00  | 0.00     | 0.00  |
| Nov | 0.00            | 0.00  | 0.00   | 0.00  | 0.00          | 0.00  | 0.00   | -0.01 | 0.00       | 0.00  | 0.00   | 0.00  | 0.00     | 0.00  |
| Dec | 0.01            | 0.01  | 0.00   | 0.01  | 0.01          | 0.00  | 0.01   | -0.01 | 0.00       | 0.01  | 0.00   | 0.00  | 0.01     | 0.02  |
| Jan | 0.01            | 0.02  | 0.01   | 0.03  | 0.04          | 0.02  | 0.03   | 0.02  | 0.01       | 0.02  | 0.01   | 0.02  | 0.02     | 0.02  |
| Feb | 0.02            | 0.03  | 0.03   | 0.02  | 0.05          | 0.04  | 0.05   | 0.03  | 0.04       | 0.03  | 0.05   | 0.03  | 0.03     | 0.02  |
| Mar | 0.06            | -0.01 | 0.07   | -0.02 | 0.06          | 0.00  | 0.06   | -0.01 | 0.07       | 0.00  | 0.07   | -0.01 | 0.04     | -0.01 |
| Apr | 0.08            | -0.02 | 0.08   | -0.02 | 0.06          | -0.02 | 0.07   | -0.03 | 0.08       | -0.02 | 0.08   | -0.02 | 0.05     | -0.02 |
| May | 0.04            | -0.01 | 0.05   | 0.00  | 0.05          | -0.01 | 0.05   | -0.01 | 0.06       | 0.00  | 0.05   | -0.01 | 0.04     | 0.00  |
| Jun | 0.01            | 0.00  | 0.01   | 0.00  | 0.02          | 0.00  | 0.02   | 0.00  | 0.02       | 0.00  | 0.01   | 0.00  | 0.02     | 0.00  |
| Jul | 0.00            | 0.00  | 0.00   | 0.00  | 0.00          | 0.00  | 0.00   | 0.00  | 0.00       | 0.00  | 0.00   | 0.00  | 0.00     | 0.00  |
| Aug | 0.00            | 0.00  | 0.00   | 0.00  | 0.00          | 0.00  | 0.00   | 0.00  | 0.00       | 0.00  | 0.00   | 0.00  | 0.00     | 0.00  |
| Sep | 0.00            | 0.00  | 0.00   | 0.00  | 0.00          | 0.00  | 0.00   | 0.00  | 0.00       | 0.00  | 0.00   | 0.00  | 0.00     | 0.00  |
| MD  | 2k<Elevation<3k |       |        |       |               |       |        |       |            |       |        |       |          |       |
|     | cnrm-esm2-1     |       |        |       | ec-earth3-veg |       |        |       | mpi-esm1-2 |       |        |       | UCLA SWE |       |
|     | 9 km            |       | 100 km |       | 9 km          |       | 100 km |       | 9 km       |       | 100 km |       | CA       | CO    |
|     | CA              | CO    | CA     | CO    | CA            | CO    | CA     | CO    | CA         | CO    | CA     | CO    | CA       | CO    |
| Oct | 0.00            | 0.00  | 0.00   | 0.00  | 0.00          | 0.00  | 0.00   | 0.00  | 0.00       | 0.00  | 0.00   | 0.00  | 0.00     | 0.00  |
| Nov | -0.02           | 0.00  | -0.02  | -0.01 | -0.01         | -0.01 | -0.01  | -0.04 | -0.01      | 0.00  | -0.01  | -0.01 | 0.00     | 0.00  |
| Dec | 0.00            | 0.00  | -0.01  | 0.00  | 0.01          | -0.02 | 0.00   | -0.06 | -0.02      | 0.00  | -0.01  | -0.01 | 0.02     | 0.01  |
| Jan | 0.02            | -0.03 | 0.01   | 0.01  | 0.09          | -0.02 | 0.07   | -0.03 | 0.00       | -0.02 | 0.00   | 0.01  | 0.04     | 0.00  |
| Feb | 0.04            | -0.02 | 0.05   | 0.00  | 0.11          | 0.01  | 0.11   | 0.01  | 0.08       | 0.00  | 0.10   | 0.04  | 0.05     | -0.01 |
| Mar | 0.15            | -0.03 | 0.19   | -0.04 | 0.14          | 0.01  | 0.13   | 0.02  | 0.16       | 0.00  | 0.19   | 0.04  | 0.09     | -0.03 |
| Apr | 0.21            | -0.03 | 0.24   | -0.03 | 0.16          | -0.01 | 0.17   | 0.01  | 0.21       | -0.01 | 0.21   | 0.03  | 0.12     | -0.04 |
| May | 0.12            | -0.04 | 0.15   | -0.02 | 0.13          | -0.04 | 0.14   | -0.01 | 0.17       | -0.02 | 0.15   | 0.00  | 0.11     | -0.04 |
| Jun | 0.04            | -0.02 | 0.05   | -0.03 | 0.07          | -0.02 | 0.07   | -0.01 | 0.06       | -0.03 | 0.04   | 0.00  | 0.05     | -0.02 |
| Jul | 0.00            | 0.00  | 0.00   | -0.02 | 0.00          | -0.01 | 0.01   | 0.00  | 0.00       | -0.01 | -0.01  | 0.00  | 0.00     | 0.00  |
| Aug | 0.00            | 0.00  | 0.00   | -0.01 | 0.00          | 0.00  | 0.00   | 0.00  | 0.00       | 0.00  | -0.01  | 0.00  | 0.00     | 0.00  |
| Sep | 0.00            | 0.00  | 0.00   | -0.01 | 0.00          | 0.00  | 0.00   | 0.00  | 0.00       | 0.00  | 0.00   | 0.00  | 0.00     | 0.00  |
| MD  | Elevation>3k    |       |        |       |               |       |        |       |            |       |        |       |          |       |
|     | cnrm-esm2-1     |       |        |       | ec-earth3-veg |       |        |       | mpi-esm1-2 |       |        |       | UCLA SWE |       |
|     | 9 km            |       | 100 km |       | 9 km          |       | 100 km |       | 9 km       |       | 100 km |       | CA       | CO    |
|     | CA              | CO    | CA     | CO    | CA            | CO    | CA     | CO    | CA         | CO    | CA     | CO    | CA       | CO    |
| Oct | 0.00            | 0.00  | 0.00   | 0.00  | 0.00          | 0.00  | 0.00   | 0.00  | 0.00       | 0.00  | 0.00   | 0.00  | 0.00     | 0.00  |
| Nov | -0.03           | 0.00  | -0.03  | -0.01 | -0.02         | -0.01 | -0.02  | -0.06 | -0.03      | 0.00  | -0.02  | -0.01 | 0.00     | 0.00  |
| Dec | 0.00            | -0.01 | -0.02  | 0.00  | 0.00          | -0.03 | 0.00   | -0.08 | -0.04      | -0.01 | -0.02  | -0.01 | 0.03     | 0.02  |

|     |       |       |       |       |       |       |       |       |       |       |       |       |       |       |
|-----|-------|-------|-------|-------|-------|-------|-------|-------|-------|-------|-------|-------|-------|-------|
| Jan | 0.04  | -0.05 | 0.04  | 0.01  | 0.14  | -0.03 | 0.12  | -0.04 | 0.01  | -0.02 | 0.01  | 0.01  | 0.07  | 0.01  |
| Feb | 0.08  | -0.03 | 0.09  | 0.01  | 0.18  | 0.01  | 0.16  | 0.01  | 0.12  | 0.01  | 0.15  | 0.06  | 0.10  | 0.00  |
| Mar | 0.22  | -0.03 | 0.28  | -0.02 | 0.22  | 0.02  | 0.20  | 0.06  | 0.24  | 0.02  | 0.29  | 0.09  | 0.14  | -0.01 |
| Apr | 0.32  | -0.01 | 0.37  | -0.02 | 0.25  | 0.01  | 0.27  | 0.08  | 0.33  | 0.02  | 0.34  | 0.11  | 0.18  | -0.02 |
| May | 0.20  | -0.07 | 0.27  | -0.01 | 0.23  | -0.06 | 0.24  | 0.01  | 0.28  | -0.02 | 0.26  | 0.05  | 0.17  | -0.05 |
| Jun | 0.09  | -0.05 | 0.11  | -0.06 | 0.15  | -0.04 | 0.14  | -0.02 | 0.12  | -0.06 | 0.08  | 0.00  | 0.08  | -0.05 |
| Jul | 0.00  | -0.01 | 0.00  | -0.04 | -0.01 | -0.01 | 0.00  | -0.01 | -0.01 | -0.02 | -0.02 | -0.01 | 0.00  | -0.01 |
| Aug | -0.01 | 0.00  | -0.01 | -0.03 | -0.01 | -0.01 | -0.01 | 0.00  | -0.01 | 0.00  | -0.02 | 0.00  | -0.01 | 0.00  |
| Sep | -0.01 | 0.00  | -0.01 | -0.01 | 0.00  | 0.00  | -0.01 | 0.00  | -0.01 | 0.00  | -0.01 | 0.00  | 0.00  | 0.00  |

MD

Forest

|     | cnrm-esm2-1 |       | ec-earth3-veg |       |      |       | mpi-esm1-2 |       |       |       | UCLA SWE |       |      |       |
|-----|-------------|-------|---------------|-------|------|-------|------------|-------|-------|-------|----------|-------|------|-------|
|     | 9 km        |       | 100 km        |       | 9 km |       | 100 km     |       | 9 km  |       | 100 km   |       | CA   | CO    |
|     | CA          | CO    | CA            | CO    | CA   | CO    | CA         | CO    | CA    | CO    | CA       | CO    |      |       |
| Oct | 0.00        | 0.00  | 0.00          | 0.00  | 0.00 | 0.00  | 0.00       | 0.00  | 0.00  | 0.00  | 0.00     | 0.00  | 0.00 | 0.00  |
| Nov | -0.01       | 0.00  | -0.01         | -0.01 | 0.00 | -0.01 | 0.00       | -0.05 | -0.01 | 0.00  | 0.00     | -0.01 | 0.00 | 0.01  |
| Dec | 0.01        | 0.00  | 0.00          | 0.00  | 0.02 | -0.03 | 0.02       | -0.08 | -0.01 | 0.00  | 0.00     | -0.01 | 0.03 | 0.02  |
| Jan | 0.03        | -0.04 | 0.02          | 0.01  | 0.11 | -0.02 | 0.10       | -0.04 | 0.02  | -0.02 | 0.02     | 0.02  | 0.06 | 0.01  |
| Feb | 0.05        | -0.02 | 0.07          | 0.01  | 0.16 | 0.02  | 0.15       | 0.01  | 0.12  | 0.01  | 0.15     | 0.07  | 0.09 | 0.00  |
| Mar | 0.19        | -0.02 | 0.24          | -0.02 | 0.19 | 0.03  | 0.19       | 0.05  | 0.22  | 0.03  | 0.25     | 0.09  | 0.13 | -0.02 |
| Apr | 0.26        | -0.01 | 0.28          | -0.02 | 0.21 | 0.01  | 0.22       | 0.06  | 0.27  | 0.02  | 0.26     | 0.09  | 0.16 | -0.03 |
| May | 0.12        | -0.06 | 0.15          | -0.02 | 0.13 | -0.06 | 0.13       | 0.00  | 0.16  | -0.02 | 0.14     | 0.03  | 0.11 | -0.06 |
| Jun | 0.02        | -0.04 | 0.03          | -0.04 | 0.05 | -0.03 | 0.05       | -0.02 | 0.04  | -0.04 | 0.02     | -0.01 | 0.03 | -0.04 |
| Jul | 0.00        | -0.01 | 0.00          | -0.03 | 0.00 | -0.01 | 0.00       | -0.01 | 0.00  | -0.01 | -0.01    | 0.00  | 0.00 | -0.01 |
| Aug | 0.00        | 0.00  | 0.00          | -0.02 | 0.00 | 0.00  | 0.00       | 0.00  | 0.00  | 0.00  | 0.00     | 0.00  | 0.00 | 0.00  |
| Sep | 0.00        | 0.00  | 0.00          | -0.01 | 0.00 | 0.00  | 0.00       | 0.00  | 0.00  | 0.00  | 0.00     | 0.00  | 0.00 | 0.00  |

RMSE

NoForest

|     | cnrm-esm2-1 |       | ec-earth3-veg |       |      |       | mpi-esm1-2 |       |       |       | UCLA SWE |       |      |       |
|-----|-------------|-------|---------------|-------|------|-------|------------|-------|-------|-------|----------|-------|------|-------|
|     | 9 km        |       | 100 km        |       | 9 km |       | 100 km     |       | 9 km  |       | 100 km   |       | CA   | CO    |
|     | CA          | CO    | CA            | CO    | CA   | CO    | CA         | CO    | CA    | CO    | CA       | CO    |      |       |
| Oct | 0.00        | 0.00  | 0.00          | 0.00  | 0.00 | 0.00  | 0.00       | 0.00  | 0.00  | 0.00  | 0.00     | 0.00  | 0.00 | 0.00  |
| Nov | -0.01       | 0.00  | -0.01         | -0.01 | 0.00 | -0.01 | 0.00       | -0.05 | -0.01 | 0.00  | -0.01    | -0.01 | 0.00 | 0.00  |
| Dec | 0.00        | 0.00  | 0.00          | 0.00  | 0.01 | -0.03 | 0.01       | -0.08 | -0.01 | 0.00  | 0.00     | -0.01 | 0.02 | 0.01  |
| Jan | 0.02        | -0.04 | 0.01          | 0.01  | 0.07 | -0.02 | 0.06       | -0.04 | 0.01  | -0.02 | 0.01     | 0.01  | 0.03 | 0.01  |
| Feb | 0.04        | -0.03 | 0.05          | 0.00  | 0.09 | 0.01  | 0.09       | 0.01  | 0.07  | 0.01  | 0.08     | 0.05  | 0.05 | -0.01 |
| Mar | 0.12        | -0.03 | 0.15          | -0.03 | 0.12 | 0.02  | 0.11       | 0.04  | 0.13  | 0.01  | 0.15     | 0.07  | 0.07 | -0.02 |
| Apr | 0.16        | -0.02 | 0.18          | -0.03 | 0.13 | 0.00  | 0.14       | 0.05  | 0.16  | 0.01  | 0.16     | 0.07  | 0.10 | -0.03 |
| May | 0.09        | -0.06 | 0.12          | -0.02 | 0.10 | -0.05 | 0.10       | 0.00  | 0.13  | -0.02 | 0.12     | 0.03  | 0.09 | -0.05 |
| Jun | 0.03        | -0.04 | 0.04          | -0.04 | 0.06 | -0.03 | 0.05       | -0.02 | 0.05  | -0.04 | 0.03     | 0.00  | 0.04 | -0.04 |
| Jul | 0.00        | -0.01 | 0.00          | -0.03 | 0.00 | -0.01 | 0.00       | -0.01 | 0.00  | -0.01 | 0.00     | 0.00  | 0.00 | -0.01 |
| Aug | 0.00        | 0.00  | 0.00          | -0.02 | 0.00 | 0.00  | 0.00       | 0.00  | 0.00  | 0.00  | 0.00     | 0.00  | 0.00 | 0.00  |
| Sep | 0.00        | 0.00  | 0.00          | -0.01 | 0.00 | 0.00  | 0.00       | 0.00  | 0.00  | 0.00  | 0.00     | 0.00  | 0.00 | 0.00  |

MD

All

|     | cnrm-esm2-1 |      | ec-earth3-veg |       |      |       | mpi-esm1-2 |       |       |      | UCLA SWE |       |      |      |
|-----|-------------|------|---------------|-------|------|-------|------------|-------|-------|------|----------|-------|------|------|
|     | 9 km        |      | 100 km        |       | 9 km |       | 100 km     |       | 9 km  |      | 100 km   |       | CA   | CO   |
|     | CA          | CO   | CA            | CO    | CA   | CO    | CA         | CO    | CA    | CO   | CA       | CO    |      |      |
| Oct | 0.00        | 0.00 | 0.00          | 0.00  | 0.00 | 0.00  | 0.00       | 0.00  | 0.00  | 0.00 | 0.00     | 0.00  | 0.00 | 0.00 |
| Nov | -0.01       | 0.00 | -0.01         | -0.01 | 0.00 | -0.01 | 0.00       | -0.05 | -0.01 | 0.00 | -0.01    | -0.01 | 0.00 | 0.00 |



|     |      |       |      |       |      |       |      |       |       |       |      |       |      |       |
|-----|------|-------|------|-------|------|-------|------|-------|-------|-------|------|-------|------|-------|
| Dec | 0.00 | 0.00  | 0.00 | 0.00  | 0.01 | -0.03 | 0.01 | -0.08 | -0.01 | 0.00  | 0.00 | -0.01 | 0.02 | 0.01  |
| Jan | 0.02 | -0.04 | 0.01 | 0.01  | 0.07 | -0.02 | 0.06 | -0.04 | 0.01  | -0.02 | 0.01 | 0.01  | 0.03 | 0.01  |
| Feb | 0.04 | -0.02 | 0.05 | 0.00  | 0.09 | 0.01  | 0.09 | 0.01  | 0.07  | 0.01  | 0.08 | 0.05  | 0.05 | -0.01 |
| Mar | 0.12 | -0.03 | 0.15 | -0.03 | 0.12 | 0.02  | 0.11 | 0.04  | 0.13  | 0.01  | 0.15 | 0.07  | 0.07 | -0.02 |
| Apr | 0.17 | -0.02 | 0.18 | -0.03 | 0.13 | 0.00  | 0.14 | 0.05  | 0.17  | 0.01  | 0.17 | 0.07  | 0.10 | -0.03 |
| May | 0.09 | -0.06 | 0.12 | -0.02 | 0.10 | -0.05 | 0.11 | 0.00  | 0.13  | -0.02 | 0.12 | 0.03  | 0.09 | -0.05 |
| Jun | 0.03 | -0.04 | 0.04 | -0.04 | 0.06 | -0.03 | 0.05 | -0.02 | 0.05  | -0.04 | 0.03 | 0.00  | 0.04 | -0.04 |
| Jul | 0.00 | -0.01 | 0.00 | -0.03 | 0.00 | -0.01 | 0.00 | -0.01 | 0.00  | -0.01 | 0.00 | 0.00  | 0.00 | -0.01 |
| Aug | 0.00 | 0.00  | 0.00 | -0.02 | 0.00 | 0.00  | 0.00 | 0.00  | 0.00  | 0.00  | 0.00 | 0.00  | 0.00 | 0.00  |
| Sep | 0.00 | 0.00  | 0.00 | -0.01 | 0.00 | 0.00  | 0.00 | 0.00  | 0.00  | 0.00  | 0.00 | 0.00  | 0.00 | 0.00  |

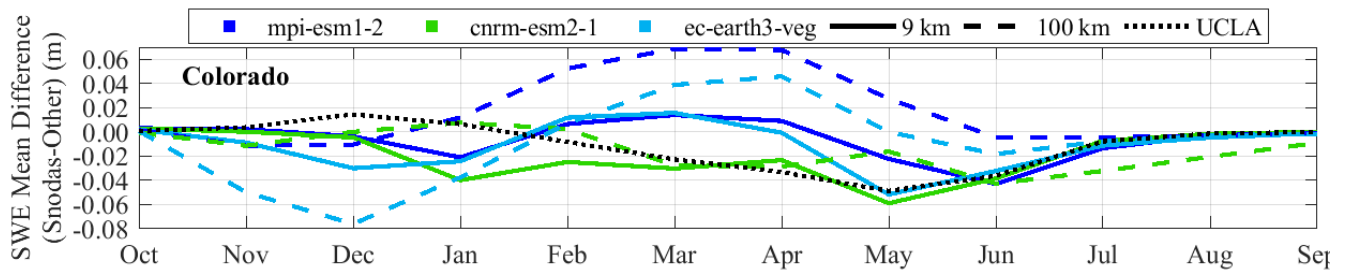

Fig. S11. The average mean difference of SWE over Colorado for the 6-year testing period (2005-2010) compares UCLA SWE (black dotted line) and downscaled SWE ( $\hat{SWE}$ ) data (blue and green lines) against SNODAS. The  $\hat{SWE}$  data, derived from various climate estimators, are identified in the legend by their names and associated colors: light blue for 'ec-earth3-veg', green for 'cnrm-esm2-1', and dark blue for 'mpi-esm1-2'. Within each color group, line styles distinguish the spatial resolutions of the climate data: solid lines indicate climate estimators at a 9 km resolution, while dashed lines represent climate estimators at a 100 km resolution.

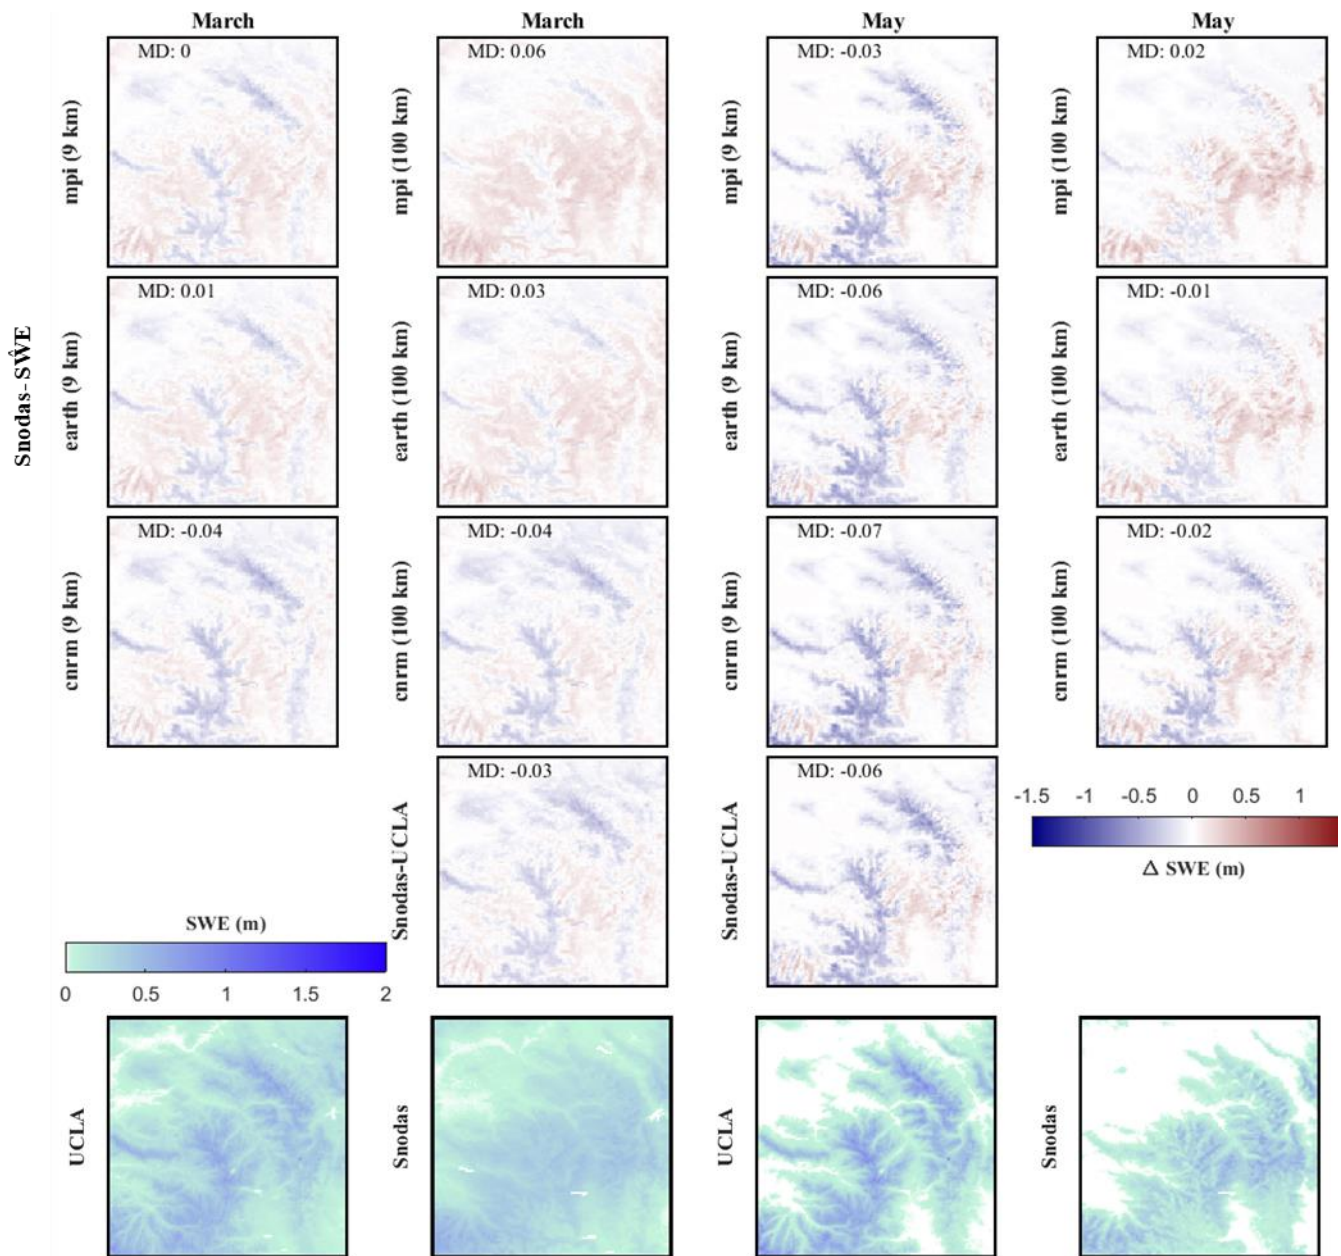

Fig. S12. Comparison with SNODAS data. The first four rows present the average difference between SNODAS and downscaled SWE (S $\hat{W}E$ ) or UCLA SWE (SNODAS-S $\hat{W}E$  or SNODAS-UCLA) over Colorado for March and May during the 6-year testing period (2005-2010). The last row compares the average UCLA SWE or SNODAS SWE over Colorado for March and May during the same 6-year testing period (2005-2010). The evaluation metric includes Mean Difference (MD).

Table S5. Comparison of downscaled SWE (SWE) or UCLA SWE with 1 km SWE from the Daymet Dataset over California (CA) and Colorado (CO). Metrics displayed include Correlation Coefficient (R), Mean Difference (MD), and Root-Mean-Squared Error (RMSE). Consideration is given only to swe values greater than 1 cm. 'Forest' denotes pixels with forest land cover, and 'NoForest' refers to non-forest pixels. The terms '9 km' and '100 km' indicate the resolutions of the climate data estimators.

| RMSE | Elevation<2k    |      |        |      |               |      |        |      |            |      |        |      |          |      |
|------|-----------------|------|--------|------|---------------|------|--------|------|------------|------|--------|------|----------|------|
|      | cnrm-esm2-1     |      |        |      | ec-earth3-veg |      |        |      | mpi-esm1-2 |      |        |      | UCLA SWE |      |
|      | 9 km            |      | 100 km |      | 9 km          |      | 100 km |      | 9 km       |      | 100 km |      | CA       | CO   |
|      | CA              | CO   | CA     | CO   | CA            | CO   | CA     | CO   | CA         | CO   | CA     | CO   | CA       | CO   |
| Oct  | 0.04            | 0.06 | 0.04   | 0.06 | 0.04          | 0.06 | 0.04   | 0.06 | 0.04       | 0.06 | 0.04   | 0.06 | 0.04     | 0.06 |
| Nov  | 0.05            | 0.07 | 0.05   | 0.07 | 0.04          | 0.07 | 0.04   | 0.09 | 0.04       | 0.06 | 0.04   | 0.06 | 0.05     | 0.07 |
| Dec  | 0.10            | 0.10 | 0.11   | 0.08 | 0.08          | 0.09 | 0.08   | 0.12 | 0.10       | 0.07 | 0.09   | 0.08 | 0.10     | 0.08 |
| Jan  | 0.15            | 0.09 | 0.16   | 0.06 | 0.10          | 0.08 | 0.11   | 0.08 | 0.17       | 0.08 | 0.18   | 0.07 | 0.15     | 0.08 |
| Feb  | 0.21            | 0.09 | 0.20   | 0.08 | 0.16          | 0.08 | 0.17   | 0.08 | 0.18       | 0.09 | 0.17   | 0.09 | 0.21     | 0.09 |
| Mar  | 0.20            | 0.11 | 0.16   | 0.10 | 0.20          | 0.11 | 0.21   | 0.10 | 0.19       | 0.11 | 0.16   | 0.12 | 0.20     | 0.11 |
| Apr  | 0.17            | 0.13 | 0.17   | 0.13 | 0.20          | 0.12 | 0.20   | 0.14 | 0.17       | 0.13 | 0.16   | 0.16 | 0.17     | 0.13 |
| May  | 0.17            | 0.15 | 0.15   | 0.16 | 0.16          | 0.15 | 0.16   | 0.19 | 0.16       | 0.16 | 0.16   | 0.21 | 0.17     | 0.15 |
| Jun  | 0.14            | 0.17 | 0.14   | 0.17 | 0.16          | 0.19 | 0.17   | 0.20 | 0.15       | 0.17 | 0.14   | 0.22 | 0.14     | 0.18 |
| Jul  | 0.12            | 0.15 | 0.12   | 0.13 | 0.12          | 0.15 | 0.12   | 0.15 | 0.12       | 0.14 | 0.11   | 0.16 | 0.12     | 0.15 |
| Aug  | 0.08            | 0.10 | 0.08   | 0.09 | 0.08          | 0.10 | 0.08   | 0.10 | 0.08       | 0.10 | 0.08   | 0.10 | 0.08     | 0.10 |
| Sep  | 0.05            | 0.07 | 0.05   | 0.06 | 0.05          | 0.07 | 0.05   | 0.07 | 0.05       | 0.07 | 0.05   | 0.07 | 0.05     | 0.07 |
| RMSE | 2k<Elevation<3k |      |        |      |               |      |        |      |            |      |        |      |          |      |
|      | cnrm-esm2-1     |      |        |      | ec-earth3-veg |      |        |      | mpi-esm1-2 |      |        |      | UCLA SWE |      |
|      | 9 km            |      | 100 km |      | 9 km          |      | 100 km |      | 9 km       |      | 100 km |      | CA       | CO   |
|      | CA              | CO   | CA     | CO   | CA            | CO   | CA     | CO   | CA         | CO   | CA     | CO   | CA       | CO   |
| Oct  | 0.02            | 0.00 | 0.02   | 0.00 | 0.02          | 0.00 | 0.02   | 0.00 | 0.02       | 0.00 | 0.02   | 0.00 | 0.02     | 0.00 |
| Nov  | 0.03            | 0.01 | 0.03   | 0.01 | 0.03          | 0.01 | 0.02   | 0.02 | 0.03       | 0.01 | 0.03   | 0.01 | 0.03     | 0.01 |
| Dec  | 0.06            | 0.02 | 0.07   | 0.02 | 0.05          | 0.02 | 0.05   | 0.03 | 0.06       | 0.02 | 0.06   | 0.02 | 0.06     | 0.02 |
| Jan  | 0.09            | 0.03 | 0.09   | 0.03 | 0.06          | 0.03 | 0.07   | 0.03 | 0.10       | 0.03 | 0.10   | 0.03 | 0.09     | 0.03 |
| Feb  | 0.12            | 0.04 | 0.12   | 0.04 | 0.10          | 0.04 | 0.10   | 0.04 | 0.11       | 0.04 | 0.10   | 0.04 | 0.12     | 0.04 |
| Mar  | 0.12            | 0.05 | 0.10   | 0.04 | 0.12          | 0.05 | 0.12   | 0.04 | 0.11       | 0.05 | 0.09   | 0.05 | 0.12     | 0.04 |
| Apr  | 0.10            | 0.05 | 0.11   | 0.05 | 0.12          | 0.05 | 0.12   | 0.05 | 0.10       | 0.06 | 0.10   | 0.05 | 0.10     | 0.05 |
| May  | 0.10            | 0.04 | 0.09   | 0.05 | 0.10          | 0.04 | 0.10   | 0.04 | 0.10       | 0.05 | 0.10   | 0.05 | 0.10     | 0.05 |
| Jun  | 0.09            | 0.03 | 0.09   | 0.03 | 0.10          | 0.03 | 0.10   | 0.03 | 0.10       | 0.03 | 0.09   | 0.03 | 0.09     | 0.03 |
| Jul  | 0.07            | 0.01 | 0.07   | 0.01 | 0.07          | 0.01 | 0.08   | 0.01 | 0.07       | 0.01 | 0.07   | 0.01 | 0.07     | 0.01 |
| Aug  | 0.05            | 0.00 | 0.05   | 0.00 | 0.05          | 0.00 | 0.05   | 0.00 | 0.05       | 0.00 | 0.05   | 0.00 | 0.05     | 0.00 |
| Sep  | 0.03            | 0.00 | 0.03   | 0.00 | 0.03          | 0.00 | 0.03   | 0.00 | 0.03       | 0.00 | 0.03   | 0.00 | 0.03     | 0.00 |
| RMSE | Elevation>3k    |      |        |      |               |      |        |      |            |      |        |      |          |      |
|      | cnrm-esm2-1     |      |        |      | ec-earth3-veg |      |        |      | mpi-esm1-2 |      |        |      | UCLA SWE |      |
|      | 9 km            |      | 100 km |      | 9 km          |      | 100 km |      | 9 km       |      | 100 km |      | CA       | CO   |
|      | CA              | CO   | CA     | CO   | CA            | CO   | CA     | CO   | CA         | CO   | CA     | CO   | CA       | CO   |
| Oct  | 0.04            | 0.04 | 0.04   | 0.04 | 0.04          | 0.04 | 0.04   | 0.04 | 0.04       | 0.04 | 0.04   | 0.04 | 0.04     | 0.04 |
| Nov  | 0.05            | 0.05 | 0.05   | 0.05 | 0.05          | 0.05 | 0.04   | 0.07 | 0.05       | 0.04 | 0.05   | 0.04 | 0.05     | 0.05 |
| Dec  | 0.11            | 0.07 | 0.13   | 0.06 | 0.10          | 0.07 | 0.10   | 0.09 | 0.12       | 0.06 | 0.11   | 0.06 | 0.11     | 0.06 |
| Jan  | 0.18            | 0.07 | 0.19   | 0.05 | 0.12          | 0.06 | 0.13   | 0.07 | 0.21       | 0.07 | 0.21   | 0.06 | 0.18     | 0.07 |
| Feb  | 0.25            | 0.08 | 0.24   | 0.07 | 0.19          | 0.07 | 0.20   | 0.07 | 0.22       | 0.08 | 0.20   | 0.08 | 0.25     | 0.08 |

|             |                    |           |               |           |                      |           |               |           |                   |           |               |           |                 |           |
|-------------|--------------------|-----------|---------------|-----------|----------------------|-----------|---------------|-----------|-------------------|-----------|---------------|-----------|-----------------|-----------|
| Mar         | 0.23               | 0.09      | 0.19          | 0.09      | 0.23                 | 0.10      | 0.25          | 0.09      | 0.22              | 0.09      | 0.18          | 0.11      | 0.23            | 0.09      |
| Apr         | 0.20               | 0.12      | 0.20          | 0.12      | 0.23                 | 0.11      | 0.23          | 0.12      | 0.19              | 0.12      | 0.19          | 0.13      | 0.20            | 0.12      |
| May         | 0.20               | 0.13      | 0.18          | 0.14      | 0.19                 | 0.13      | 0.18          | 0.15      | 0.18              | 0.14      | 0.18          | 0.17      | 0.20            | 0.14      |
| Jun         | 0.16               | 0.13      | 0.15          | 0.13      | 0.18                 | 0.15      | 0.19          | 0.16      | 0.17              | 0.13      | 0.16          | 0.16      | 0.16            | 0.14      |
| Jul         | 0.14               | 0.11      | 0.13          | 0.09      | 0.13                 | 0.11      | 0.14          | 0.11      | 0.13              | 0.10      | 0.13          | 0.11      | 0.14            | 0.11      |
| Aug         | 0.09               | 0.07      | 0.08          | 0.06      | 0.09                 | 0.07      | 0.08          | 0.07      | 0.08              | 0.07      | 0.08          | 0.07      | 0.09            | 0.07      |
| Sep         | 0.05               | 0.05      | 0.05          | 0.04      | 0.06                 | 0.05      | 0.06          | 0.05      | 0.06              | 0.05      | 0.06          | 0.05      | 0.05            | 0.05      |
| <b>RMSE</b> | <b>Forest</b>      |           |               |           |                      |           |               |           |                   |           |               |           |                 |           |
|             | <b>cnrm-esm2-1</b> |           |               |           | <b>ec-earth3-veg</b> |           |               |           | <b>mpi-esm1-2</b> |           |               |           | <b>UCLA SWE</b> |           |
|             | <b>9 km</b>        |           | <b>100 km</b> |           | <b>9 km</b>          |           | <b>100 km</b> |           | <b>9 km</b>       |           | <b>100 km</b> |           | <b>CA</b>       | <b>CO</b> |
|             | <b>CA</b>          | <b>CO</b> | <b>CA</b>     | <b>CO</b> | <b>CA</b>            | <b>CO</b> | <b>CA</b>     | <b>CO</b> | <b>CA</b>         | <b>CO</b> | <b>CA</b>     | <b>CO</b> | <b>CA</b>       | <b>CO</b> |
| Oct         | 0.02               | 0.04      | 0.02          | 0.04      | 0.02                 | 0.04      | 0.02          | 0.04      | 0.02              | 0.04      | 0.02          | 0.04      | 0.02            | 0.04      |
| Nov         | 0.04               | 0.05      | 0.04          | 0.05      | 0.03                 | 0.05      | 0.02          | 0.08      | 0.03              | 0.05      | 0.03          | 0.05      | 0.04            | 0.05      |
| Dec         | 0.10               | 0.09      | 0.11          | 0.07      | 0.08                 | 0.09      | 0.09          | 0.12      | 0.12              | 0.06      | 0.10          | 0.06      | 0.10            | 0.07      |
| Jan         | 0.21               | 0.09      | 0.22          | 0.06      | 0.13                 | 0.08      | 0.14          | 0.09      | 0.23              | 0.08      | 0.23          | 0.07      | 0.21            | 0.08      |
| Feb         | 0.30               | 0.09      | 0.28          | 0.08      | 0.20                 | 0.09      | 0.21          | 0.08      | 0.24              | 0.09      | 0.21          | 0.09      | 0.30            | 0.09      |
| Mar         | 0.25               | 0.11      | 0.20          | 0.10      | 0.25                 | 0.11      | 0.26          | 0.10      | 0.23              | 0.11      | 0.19          | 0.12      | 0.25            | 0.11      |
| Apr         | 0.18               | 0.14      | 0.17          | 0.13      | 0.23                 | 0.12      | 0.22          | 0.14      | 0.18              | 0.14      | 0.17          | 0.16      | 0.18            | 0.13      |
| May         | 0.16               | 0.16      | 0.14          | 0.16      | 0.15                 | 0.15      | 0.15          | 0.19      | 0.14              | 0.16      | 0.14          | 0.20      | 0.16            | 0.15      |
| Jun         | 0.12               | 0.16      | 0.11          | 0.16      | 0.13                 | 0.18      | 0.14          | 0.19      | 0.13              | 0.16      | 0.12          | 0.21      | 0.12            | 0.17      |
| Jul         | 0.09               | 0.13      | 0.09          | 0.11      | 0.09                 | 0.13      | 0.09          | 0.13      | 0.09              | 0.13      | 0.09          | 0.14      | 0.09            | 0.13      |
| Aug         | 0.05               | 0.08      | 0.05          | 0.07      | 0.05                 | 0.07      | 0.05          | 0.08      | 0.05              | 0.08      | 0.05          | 0.08      | 0.05            | 0.08      |
| Sep         | 0.03               | 0.05      | 0.03          | 0.05      | 0.03                 | 0.05      | 0.03          | 0.05      | 0.03              | 0.05      | 0.03          | 0.05      | 0.03            | 0.05      |
| <b>RMSE</b> | <b>NoForest</b>    |           |               |           |                      |           |               |           |                   |           |               |           |                 |           |
|             | <b>cnrm-esm2-1</b> |           |               |           | <b>ec-earth3-veg</b> |           |               |           | <b>mpi-esm1-2</b> |           |               |           | <b>UCLA SWE</b> |           |
|             | <b>9 km</b>        |           | <b>100 km</b> |           | <b>9 km</b>          |           | <b>100 km</b> |           | <b>9 km</b>       |           | <b>100 km</b> |           | <b>CA</b>       | <b>CO</b> |
|             | <b>CA</b>          | <b>CO</b> | <b>CA</b>     | <b>CO</b> | <b>CA</b>            | <b>CO</b> | <b>CA</b>     | <b>CO</b> | <b>CA</b>         | <b>CO</b> | <b>CA</b>     | <b>CO</b> | <b>CA</b>       | <b>CO</b> |
| Oct         | 0.04               | 0.06      | 0.04          | 0.06      | 0.04                 | 0.06      | 0.04          | 0.06      | 0.04              | 0.06      | 0.04          | 0.06      | 0.04            | 0.06      |
| Nov         | 0.05               | 0.07      | 0.05          | 0.07      | 0.04                 | 0.07      | 0.04          | 0.09      | 0.04              | 0.06      | 0.04          | 0.06      | 0.05            | 0.07      |
| Dec         | 0.10               | 0.10      | 0.11          | 0.08      | 0.08                 | 0.09      | 0.08          | 0.12      | 0.10              | 0.07      | 0.09          | 0.08      | 0.10            | 0.08      |
| Jan         | 0.15               | 0.09      | 0.16          | 0.06      | 0.10                 | 0.08      | 0.11          | 0.08      | 0.17              | 0.08      | 0.18          | 0.07      | 0.15            | 0.08      |
| Feb         | 0.21               | 0.09      | 0.20          | 0.08      | 0.16                 | 0.08      | 0.17          | 0.08      | 0.18              | 0.09      | 0.17          | 0.09      | 0.21            | 0.09      |
| Mar         | 0.20               | 0.11      | 0.16          | 0.10      | 0.20                 | 0.11      | 0.21          | 0.10      | 0.18              | 0.11      | 0.16          | 0.12      | 0.20            | 0.11      |
| Apr         | 0.17               | 0.13      | 0.17          | 0.13      | 0.20                 | 0.12      | 0.20          | 0.14      | 0.17              | 0.13      | 0.16          | 0.16      | 0.17            | 0.13      |
| May         | 0.17               | 0.15      | 0.15          | 0.16      | 0.16                 | 0.15      | 0.16          | 0.19      | 0.16              | 0.16      | 0.15          | 0.21      | 0.17            | 0.15      |
| Jun         | 0.14               | 0.17      | 0.13          | 0.17      | 0.16                 | 0.19      | 0.17          | 0.20      | 0.15              | 0.17      | 0.14          | 0.22      | 0.14            | 0.18      |
| Jul         | 0.12               | 0.15      | 0.12          | 0.13      | 0.12                 | 0.15      | 0.12          | 0.15      | 0.12              | 0.14      | 0.11          | 0.16      | 0.12            | 0.15      |
| Aug         | 0.08               | 0.10      | 0.08          | 0.09      | 0.08                 | 0.10      | 0.08          | 0.10      | 0.08              | 0.10      | 0.08          | 0.10      | 0.08            | 0.10      |
| Sep         | 0.05               | 0.07      | 0.05          | 0.06      | 0.05                 | 0.07      | 0.05          | 0.07      | 0.05              | 0.07      | 0.05          | 0.07      | 0.05            | 0.07      |
| <b>RMSE</b> | <b>All</b>         |           |               |           |                      |           |               |           |                   |           |               |           |                 |           |
|             | <b>cnrm-esm2-1</b> |           |               |           | <b>ec-earth3-veg</b> |           |               |           | <b>mpi-esm1-2</b> |           |               |           | <b>UCLA SWE</b> |           |
|             | <b>9 km</b>        |           | <b>100 km</b> |           | <b>9 km</b>          |           | <b>100 km</b> |           | <b>9 km</b>       |           | <b>100 km</b> |           | <b>CA</b>       | <b>CO</b> |
|             | <b>CA</b>          | <b>CO</b> | <b>CA</b>     | <b>CO</b> | <b>CA</b>            | <b>CO</b> | <b>CA</b>     | <b>CO</b> | <b>CA</b>         | <b>CO</b> | <b>CA</b>     | <b>CO</b> | <b>CA</b>       | <b>CO</b> |
| Oct         | 0.09               | 0.07      | 0.09          | 0.07      | 0.09                 | 0.07      | 0.09          | 0.07      | 0.09              | 0.07      | 0.09          | 0.07      | 0.09            | 0.07      |
| Nov         | 0.10               | 0.08      | 0.10          | 0.08      | 0.09                 | 0.08      | 0.09          | 0.11      | 0.09              | 0.08      | 0.09          | 0.07      | 0.10            | 0.08      |
| Dec         | 0.17               | 0.11      | 0.19          | 0.10      | 0.15                 | 0.11      | 0.15          | 0.13      | 0.17              | 0.08      | 0.15          | 0.09      | 0.17            | 0.09      |
| Jan         | 0.20               | 0.09      | 0.21          | 0.07      | 0.14                 | 0.08      | 0.16          | 0.09      | 0.24              | 0.08      | 0.25          | 0.07      | 0.20            | 0.08      |

|          |                              |           |               |           |                      |           |               |           |                   |           |               |           |                 |           |
|----------|------------------------------|-----------|---------------|-----------|----------------------|-----------|---------------|-----------|-------------------|-----------|---------------|-----------|-----------------|-----------|
| Feb      | 0.27                         | 0.10      | 0.26          | 0.09      | 0.21                 | 0.09      | 0.24          | 0.09      | 0.25              | 0.10      | 0.23          | 0.10      | 0.27            | 0.10      |
| Mar      | 0.27                         | 0.11      | 0.23          | 0.11      | 0.26                 | 0.12      | 0.28          | 0.11      | 0.25              | 0.11      | 0.22          | 0.13      | 0.27            | 0.11      |
| Apr      | 0.27                         | 0.14      | 0.27          | 0.14      | 0.28                 | 0.13      | 0.29          | 0.15      | 0.25              | 0.14      | 0.25          | 0.17      | 0.27            | 0.14      |
| May      | 0.28                         | 0.16      | 0.26          | 0.17      | 0.27                 | 0.16      | 0.25          | 0.20      | 0.26              | 0.17      | 0.25          | 0.23      | 0.28            | 0.16      |
| Jun      | 0.25                         | 0.19      | 0.24          | 0.19      | 0.29                 | 0.21      | 0.30          | 0.23      | 0.28              | 0.19      | 0.25          | 0.25      | 0.25            | 0.21      |
| Jul      | 0.24                         | 0.18      | 0.24          | 0.15      | 0.24                 | 0.17      | 0.25          | 0.18      | 0.23              | 0.17      | 0.23          | 0.18      | 0.24            | 0.18      |
| Aug      | 0.17                         | 0.12      | 0.17          | 0.10      | 0.17                 | 0.11      | 0.17          | 0.12      | 0.17              | 0.12      | 0.17          | 0.12      | 0.17            | 0.12      |
| Sep      | 0.12                         | 0.08      | 0.12          | 0.08      | 0.12                 | 0.08      | 0.12          | 0.08      | 0.12              | 0.08      | 0.12          | 0.08      | 0.12            | 0.08      |
| <b>R</b> | <b>Elevation&lt;2k</b>       |           |               |           |                      |           |               |           |                   |           |               |           |                 |           |
|          | <b>cnrm-esm2-1</b>           |           |               |           | <b>ec-earth3-veg</b> |           |               |           | <b>mpi-esm1-2</b> |           |               |           | <b>UCLA SWE</b> |           |
|          | <b>9 km</b>                  |           | <b>100 km</b> |           | <b>9 km</b>          |           | <b>100 km</b> |           | <b>9 km</b>       |           | <b>100 km</b> |           | <b>CA</b>       | <b>CO</b> |
|          | <b>CA</b>                    | <b>CO</b> | <b>CA</b>     | <b>CO</b> | <b>CA</b>            | <b>CO</b> | <b>CA</b>     | <b>CO</b> | <b>CA</b>         | <b>CO</b> | <b>CA</b>     | <b>CO</b> | <b>CA</b>       | <b>CO</b> |
| Oct      | -0.04                        | 0.78      | 0.00          | 0.66      | -0.05                | 0.73      | -0.04         | 0.74      | 0.01              | NaN       | 0.01          | NaN       | -0.04           | 0.76      |
| Nov      | 0.14                         | 0.73      | 0.12          | 0.68      | 0.18                 | 0.72      | 0.17          | 0.76      | 0.18              | 0.67      | 0.15          | 0.73      | 0.14            | 0.46      |
| Dec      | 0.49                         | 0.83      | 0.50          | 0.81      | 0.50                 | 0.82      | 0.50          | 0.83      | 0.50              | 0.81      | 0.50          | 0.78      | 0.49            | 0.75      |
| Jan      | 0.76                         | 0.85      | 0.76          | 0.85      | 0.75                 | 0.87      | 0.76          | 0.88      | 0.77              | 0.87      | 0.76          | 0.78      | 0.76            | 0.80      |
| Feb      | 0.77                         | 0.86      | 0.77          | 0.87      | 0.77                 | 0.89      | 0.77          | 0.90      | 0.78              | 0.89      | 0.78          | 0.78      | 0.77            | 0.84      |
| Mar      | 0.80                         | 0.87      | 0.80          | 0.89      | 0.79                 | 0.88      | 0.79          | 0.89      | 0.80              | 0.87      | 0.80          | 0.82      | 0.80            | 0.86      |
| Apr      | 0.78                         | 0.84      | 0.79          | 0.84      | 0.78                 | 0.86      | 0.77          | 0.87      | 0.77              | 0.82      | 0.79          | 0.85      | 0.78            | 0.80      |
| May      | 0.74                         | 0.80      | 0.73          | 0.77      | 0.72                 | 0.80      | 0.73          | 0.81      | 0.69              | 0.76      | 0.71          | 0.78      | 0.74            | 0.73      |
| Jun      | 0.62                         | 0.76      | 0.62          | 0.79      | 0.59                 | 0.74      | 0.57          | 0.73      | 0.59              | 0.68      | 0.62          | 0.72      | 0.62            | 0.42      |
| Jul      | 0.40                         | NaN       | 0.44          | 0.68      | 0.44                 | NaN       | 0.42          | NaN       | 0.44              | NaN       | 0.46          | NaN       | 0.40            | -0.02     |
| Aug      | 0.27                         | NaN       | 0.29          | 0.37      | 0.25                 | NaN       | 0.28          | NaN       | 0.25              | NaN       | 0.28          | NaN       | 0.27            | NaN       |
| Sep      | 0.18                         | NaN       | 0.15          | NaN       | 0.13                 | NaN       | 0.17          | NaN       | 0.18              | NaN       | 0.20          | NaN       | 0.18            | NaN       |
| <b>R</b> | <b>2k&lt;Elevation&lt;3k</b> |           |               |           |                      |           |               |           |                   |           |               |           |                 |           |
|          | <b>cnrm-esm2-1</b>           |           |               |           | <b>ec-earth3-veg</b> |           |               |           | <b>mpi-esm1-2</b> |           |               |           | <b>UCLA SWE</b> |           |
|          | <b>9 km</b>                  |           | <b>100 km</b> |           | <b>9 km</b>          |           | <b>100 km</b> |           | <b>9 km</b>       |           | <b>100 km</b> |           | <b>CA</b>       | <b>CO</b> |
|          | <b>CA</b>                    | <b>CO</b> | <b>CA</b>     | <b>CO</b> | <b>CA</b>            | <b>CO</b> | <b>CA</b>     | <b>CO</b> | <b>CA</b>         | <b>CO</b> | <b>CA</b>     | <b>CO</b> | <b>CA</b>       | <b>CO</b> |
| Oct      | -0.05                        | 0.36      | -0.02         | 0.36      | -0.05                | 0.34      | -0.05         | 0.40      | -0.01             | 0.34      | -0.02         | 0.38      | -0.05           | 0.29      |
| Nov      | 0.09                         | 0.49      | 0.08          | 0.52      | 0.13                 | 0.54      | 0.12          | 0.55      | 0.13              | 0.47      | 0.12          | 0.50      | 0.09            | 0.29      |
| Dec      | 0.47                         | 0.72      | 0.47          | 0.73      | 0.47                 | 0.73      | 0.47          | 0.73      | 0.47              | 0.70      | 0.47          | 0.72      | 0.47            | 0.64      |
| Jan      | 0.70                         | 0.82      | 0.70          | 0.82      | 0.69                 | 0.82      | 0.71          | 0.82      | 0.71              | 0.82      | 0.70          | 0.81      | 0.70            | 0.76      |
| Feb      | 0.70                         | 0.85      | 0.70          | 0.84      | 0.70                 | 0.85      | 0.71          | 0.85      | 0.72              | 0.85      | 0.72          | 0.84      | 0.70            | 0.78      |
| Mar      | 0.76                         | 0.87      | 0.77          | 0.86      | 0.74                 | 0.86      | 0.75          | 0.86      | 0.76              | 0.86      | 0.76          | 0.85      | 0.76            | 0.80      |
| Apr      | 0.75                         | 0.86      | 0.76          | 0.86      | 0.75                 | 0.86      | 0.74          | 0.86      | 0.75              | 0.84      | 0.76          | 0.85      | 0.75            | 0.79      |
| May      | 0.72                         | 0.81      | 0.72          | 0.78      | 0.71                 | 0.82      | 0.71          | 0.82      | 0.69              | 0.78      | 0.70          | 0.77      | 0.72            | 0.70      |
| Jun      | 0.62                         | 0.60      | 0.62          | 0.66      | 0.60                 | 0.61      | 0.58          | 0.57      | 0.60              | 0.61      | 0.62          | 0.44      | 0.62            | 0.43      |
| Jul      | 0.39                         | 0.30      | 0.42          | 0.50      | 0.42                 | 0.41      | 0.41          | 0.33      | 0.43              | 0.37      | 0.45          | 0.26      | 0.39            | 0.13      |
| Aug      | 0.22                         | 0.25      | 0.25          | 0.36      | 0.22                 | 0.35      | 0.23          | 0.30      | 0.21              | 0.29      | 0.24          | 0.28      | 0.22            | 0.07      |
| Sep      | 0.15                         | 0.40      | 0.14          | 0.37      | 0.13                 | 0.34      | 0.14          | 0.38      | 0.14              | 0.41      | 0.15          | 0.38      | 0.15            | 0.14      |
| <b>R</b> | <b>Elevation&gt;3k</b>       |           |               |           |                      |           |               |           |                   |           |               |           |                 |           |
|          | <b>cnrm-esm2-1</b>           |           |               |           | <b>ec-earth3-veg</b> |           |               |           | <b>mpi-esm1-2</b> |           |               |           | <b>UCLA SWE</b> |           |
|          | <b>9 km</b>                  |           | <b>100 km</b> |           | <b>9 km</b>          |           | <b>100 km</b> |           | <b>9 km</b>       |           | <b>100 km</b> |           | <b>CA</b>       | <b>CO</b> |
|          | <b>CA</b>                    | <b>CO</b> | <b>CA</b>     | <b>CO</b> | <b>CA</b>            | <b>CO</b> | <b>CA</b>     | <b>CO</b> | <b>CA</b>         | <b>CO</b> | <b>CA</b>     | <b>CO</b> | <b>CA</b>       | <b>CO</b> |
| Oct      | -0.07                        | 0.30      | -0.05         | 0.32      | -0.09                | 0.28      | -0.09         | 0.36      | -0.04             | 0.30      | -0.05         | 0.34      | -0.07           | 0.27      |
| Nov      | 0.08                         | 0.48      | 0.08          | 0.51      | 0.10                 | 0.52      | 0.09          | 0.52      | 0.10              | 0.48      | 0.09          | 0.50      | 0.08            | 0.31      |
| Dec      | 0.42                         | 0.70      | 0.43          | 0.69      | 0.43                 | 0.69      | 0.42          | 0.69      | 0.43              | 0.67      | 0.43          | 0.68      | 0.42            | 0.61      |

|     |      |      |      |      |      |      |      |      |      |      |      |      |      |      |
|-----|------|------|------|------|------|------|------|------|------|------|------|------|------|------|
| Jan | 0.69 | 0.80 | 0.69 | 0.79 | 0.69 | 0.79 | 0.70 | 0.80 | 0.70 | 0.79 | 0.70 | 0.79 | 0.69 | 0.73 |
| Feb | 0.70 | 0.82 | 0.70 | 0.82 | 0.70 | 0.82 | 0.71 | 0.82 | 0.71 | 0.82 | 0.71 | 0.81 | 0.70 | 0.75 |
| Mar | 0.76 | 0.84 | 0.77 | 0.83 | 0.74 | 0.84 | 0.75 | 0.83 | 0.76 | 0.83 | 0.76 | 0.83 | 0.76 | 0.77 |
| Apr | 0.76 | 0.84 | 0.76 | 0.84 | 0.75 | 0.84 | 0.75 | 0.84 | 0.75 | 0.83 | 0.76 | 0.83 | 0.76 | 0.77 |
| May | 0.73 | 0.81 | 0.72 | 0.78 | 0.71 | 0.81 | 0.72 | 0.82 | 0.69 | 0.77 | 0.71 | 0.77 | 0.73 | 0.70 |
| Jun | 0.61 | 0.63 | 0.61 | 0.68 | 0.57 | 0.63 | 0.55 | 0.61 | 0.58 | 0.64 | 0.62 | 0.45 | 0.61 | 0.46 |
| Jul | 0.36 | 0.32 | 0.39 | 0.54 | 0.40 | 0.43 | 0.38 | 0.37 | 0.40 | 0.40 | 0.43 | 0.26 | 0.36 | 0.12 |
| Aug | 0.22 | 0.24 | 0.24 | 0.37 | 0.20 | 0.33 | 0.23 | 0.27 | 0.20 | 0.26 | 0.24 | 0.25 | 0.22 | 0.03 |
| Sep | 0.12 | 0.33 | 0.10 | 0.33 | 0.08 | 0.29 | 0.11 | 0.31 | 0.12 | 0.33 | 0.13 | 0.32 | 0.12 | 0.09 |

| R   | Forest      |      |        |      |               |      |        |      |            |      |        |      |          |      |
|-----|-------------|------|--------|------|---------------|------|--------|------|------------|------|--------|------|----------|------|
|     | cnrm-esm2-1 |      |        |      | ec-earth3-veg |      |        |      | mpi-esm1-2 |      |        |      | UCLA SWE |      |
|     | 9 km        |      | 100 km |      | 9 km          |      | 100 km |      | 9 km       |      | 100 km |      | CA       | CO   |
|     | CA          | CO   | CA     | CO   | CA            | CO   | CA     | CO   | CA         | CO   | CA     | CO   |          |      |
| Oct | 0.08        | 0.30 | 0.11   | 0.32 | 0.08          | 0.30 | 0.03   | 0.37 | 0.12       | 0.28 | 0.13   | 0.33 | 0.08     | 0.22 |
| Nov | 0.13        | 0.45 | 0.12   | 0.50 | 0.14          | 0.51 | 0.15   | 0.53 | 0.13       | 0.44 | 0.25   | 0.47 | 0.13     | 0.28 |
| Dec | 0.46        | 0.70 | 0.46   | 0.69 | 0.47          | 0.70 | 0.47   | 0.70 | 0.47       | 0.68 | 0.47   | 0.69 | 0.46     | 0.62 |
| Jan | 0.66        | 0.79 | 0.66   | 0.78 | 0.68          | 0.78 | 0.69   | 0.78 | 0.67       | 0.78 | 0.68   | 0.77 | 0.66     | 0.71 |
| Feb | 0.62        | 0.82 | 0.63   | 0.81 | 0.65          | 0.82 | 0.66   | 0.81 | 0.65       | 0.81 | 0.66   | 0.80 | 0.62     | 0.75 |
| Mar | 0.75        | 0.84 | 0.76   | 0.83 | 0.77          | 0.83 | 0.76   | 0.82 | 0.76       | 0.83 | 0.76   | 0.81 | 0.75     | 0.77 |
| Apr | 0.76        | 0.85 | 0.77   | 0.85 | 0.78          | 0.84 | 0.77   | 0.83 | 0.76       | 0.83 | 0.77   | 0.82 | 0.76     | 0.79 |
| May | 0.71        | 0.81 | 0.71   | 0.79 | 0.72          | 0.81 | 0.71   | 0.81 | 0.70       | 0.79 | 0.71   | 0.77 | 0.71     | 0.73 |
| Jun | 0.60        | 0.62 | 0.60   | 0.69 | 0.58          | 0.62 | 0.57   | 0.59 | 0.59       | 0.64 | 0.61   | 0.47 | 0.60     | 0.49 |
| Jul | 0.36        | 0.28 | 0.40   | 0.52 | 0.40          | 0.38 | 0.38   | 0.31 | 0.40       | 0.37 | 0.42   | 0.24 | 0.36     | 0.19 |
| Aug | 0.20        | 0.22 | 0.23   | 0.31 | 0.20          | 0.28 | 0.21   | 0.21 | 0.22       | 0.24 | 0.22   | 0.22 | 0.20     | 0.17 |
| Sep | 0.22        | 0.38 | 0.23   | 0.30 | 0.16          | 0.28 | 0.18   | 0.32 | 0.21       | 0.38 | 0.19   | 0.35 | 0.22     | 0.27 |

| R   | NoForest    |      |        |      |               |      |        |      |            |      |        |      |          |      |
|-----|-------------|------|--------|------|---------------|------|--------|------|------------|------|--------|------|----------|------|
|     | cnrm-esm2-1 |      |        |      | ec-earth3-veg |      |        |      | mpi-esm1-2 |      |        |      | UCLA SWE |      |
|     | 9 km        |      | 100 km |      | 9 km          |      | 100 km |      | 9 km       |      | 100 km |      | CA       | CO   |
|     | CA          | CO   | CA     | CO   | CA            | CO   | CA     | CO   | CA         | CO   | CA     | CO   |          |      |
| Oct | -0.06       | 0.33 | -0.03  | 0.35 | -0.06         | 0.31 | -0.06  | 0.38 | -0.02      | 0.32 | -0.02  | 0.36 | -0.06    | 0.30 |
| Nov | 0.10        | 0.50 | 0.09   | 0.53 | 0.13          | 0.54 | 0.12   | 0.55 | 0.13       | 0.49 | 0.12   | 0.51 | 0.10     | 0.32 |
| Dec | 0.48        | 0.72 | 0.48   | 0.73 | 0.48          | 0.73 | 0.48   | 0.72 | 0.49       | 0.70 | 0.49   | 0.72 | 0.48     | 0.64 |
| Jan | 0.73        | 0.82 | 0.72   | 0.82 | 0.71          | 0.82 | 0.73   | 0.82 | 0.73       | 0.81 | 0.73   | 0.81 | 0.73     | 0.76 |
| Feb | 0.73        | 0.84 | 0.73   | 0.84 | 0.72          | 0.84 | 0.73   | 0.84 | 0.74       | 0.84 | 0.74   | 0.83 | 0.73     | 0.78 |
| Mar | 0.78        | 0.86 | 0.78   | 0.85 | 0.76          | 0.86 | 0.76   | 0.85 | 0.78       | 0.85 | 0.78   | 0.85 | 0.78     | 0.79 |
| Apr | 0.76        | 0.86 | 0.77   | 0.86 | 0.76          | 0.86 | 0.75   | 0.86 | 0.76       | 0.84 | 0.77   | 0.85 | 0.76     | 0.79 |
| May | 0.73        | 0.82 | 0.73   | 0.79 | 0.71          | 0.82 | 0.72   | 0.83 | 0.69       | 0.78 | 0.71   | 0.78 | 0.73     | 0.71 |
| Jun | 0.62        | 0.62 | 0.62   | 0.68 | 0.60          | 0.63 | 0.58   | 0.60 | 0.60       | 0.63 | 0.63   | 0.46 | 0.62     | 0.45 |
| Jul | 0.39        | 0.33 | 0.42   | 0.53 | 0.42          | 0.44 | 0.40   | 0.37 | 0.43       | 0.41 | 0.45   | 0.28 | 0.39     | 0.15 |
| Aug | 0.23        | 0.26 | 0.25   | 0.39 | 0.22          | 0.36 | 0.24   | 0.31 | 0.21       | 0.30 | 0.24   | 0.29 | 0.23     | 0.08 |
| Sep | 0.15        | 0.37 | 0.14   | 0.36 | 0.12          | 0.33 | 0.14   | 0.36 | 0.14       | 0.38 | 0.15   | 0.37 | 0.15     | 0.14 |

| R   | All         |      |        |      |               |      |        |      |            |      |        |      |          |      |
|-----|-------------|------|--------|------|---------------|------|--------|------|------------|------|--------|------|----------|------|
|     | cnrm-esm2-1 |      |        |      | ec-earth3-veg |      |        |      | mpi-esm1-2 |      |        |      | UCLA SWE |      |
|     | 9 km        |      | 100 km |      | 9 km          |      | 100 km |      | 9 km       |      | 100 km |      | CA       | CO   |
|     | CA          | CO   | CA     | CO   | CA            | CO   | CA     | CO   | CA         | CO   | CA     | CO   |          |      |
| Oct | -0.06       | 0.33 | -0.03  | 0.35 | -0.06         | 0.31 | -0.06  | 0.38 | -0.02      | 0.32 | -0.02  | 0.36 | -0.06    | 0.29 |
| Nov | 0.09        | 0.50 | 0.09   | 0.53 | 0.13          | 0.54 | 0.12   | 0.55 | 0.13       | 0.49 | 0.12   | 0.51 | 0.09     | 0.31 |

|     |      |      |      |      |      |      |      |      |      |      |      |      |      |      |
|-----|------|------|------|------|------|------|------|------|------|------|------|------|------|------|
| Dec | 0.47 | 0.72 | 0.48 | 0.72 | 0.48 | 0.72 | 0.48 | 0.72 | 0.48 | 0.70 | 0.48 | 0.71 | 0.47 | 0.64 |
| Jan | 0.73 | 0.82 | 0.72 | 0.82 | 0.71 | 0.82 | 0.73 | 0.82 | 0.73 | 0.81 | 0.73 | 0.81 | 0.73 | 0.76 |
| Feb | 0.72 | 0.84 | 0.73 | 0.83 | 0.72 | 0.84 | 0.73 | 0.84 | 0.74 | 0.84 | 0.73 | 0.83 | 0.72 | 0.78 |
| Mar | 0.78 | 0.86 | 0.78 | 0.85 | 0.76 | 0.85 | 0.76 | 0.85 | 0.78 | 0.85 | 0.78 | 0.85 | 0.78 | 0.79 |
| Apr | 0.76 | 0.86 | 0.77 | 0.86 | 0.76 | 0.86 | 0.75 | 0.86 | 0.76 | 0.84 | 0.77 | 0.84 | 0.76 | 0.79 |
| May | 0.73 | 0.82 | 0.72 | 0.79 | 0.71 | 0.82 | 0.72 | 0.83 | 0.69 | 0.78 | 0.71 | 0.78 | 0.73 | 0.71 |
| Jun | 0.62 | 0.62 | 0.62 | 0.68 | 0.60 | 0.63 | 0.58 | 0.60 | 0.60 | 0.63 | 0.63 | 0.46 | 0.62 | 0.45 |
| Jul | 0.39 | 0.33 | 0.42 | 0.53 | 0.42 | 0.43 | 0.40 | 0.37 | 0.43 | 0.41 | 0.45 | 0.28 | 0.39 | 0.15 |
| Aug | 0.23 | 0.26 | 0.25 | 0.39 | 0.22 | 0.35 | 0.24 | 0.30 | 0.21 | 0.30 | 0.24 | 0.29 | 0.23 | 0.07 |
| Sep | 0.15 | 0.37 | 0.13 | 0.36 | 0.12 | 0.33 | 0.14 | 0.36 | 0.14 | 0.38 | 0.15 | 0.37 | 0.15 | 0.14 |

| MD  | Elevation<2k |      |        |      |               |      |        |       |            |      |        |      |          |      |
|-----|--------------|------|--------|------|---------------|------|--------|-------|------------|------|--------|------|----------|------|
|     | cnrm-esm2-1  |      |        |      | ec-earth3-veg |      |        |       | mpi-esm1-2 |      |        |      | UCLA SWE |      |
|     | 9 km         |      | 100 km |      | 9 km          |      | 100 km |       | 9 km       |      | 100 km |      | CA       | CO   |
|     | CA           | CO   | CA     | CO   | CA            | CO   | CA     | CO    | CA         | CO   | CA     | CO   |          |      |
| Oct | 0.00         | 0.00 | 0.00   | 0.00 | 0.00          | 0.00 | 0.00   | 0.00  | 0.00       | 0.00 | 0.00   | 0.00 | 0.00     | 0.00 |
| Nov | 0.00         | 0.00 | 0.00   | 0.00 | 0.00          | 0.00 | 0.00   | -0.01 | 0.00       | 0.00 | 0.00   | 0.00 | 0.00     | 0.00 |
| Dec | -0.01        | 0.01 | -0.01  | 0.01 | -0.01         | 0.00 | -0.01  | -0.01 | -0.02      | 0.01 | -0.01  | 0.00 | -0.01    | 0.02 |
| Jan | -0.03        | 0.02 | -0.03  | 0.02 | 0.00          | 0.02 | -0.01  | 0.01  | -0.03      | 0.02 | -0.03  | 0.02 | -0.03    | 0.02 |
| Feb | -0.04        | 0.02 | -0.04  | 0.02 | -0.01         | 0.03 | -0.02  | 0.03  | -0.02      | 0.03 | -0.02  | 0.03 | -0.04    | 0.01 |
| Mar | -0.02        | 0.03 | -0.01  | 0.02 | -0.02         | 0.03 | -0.02  | 0.03  | -0.01      | 0.03 | -0.01  | 0.03 | -0.02    | 0.03 |
| Apr | 0.01         | 0.03 | 0.01   | 0.03 | -0.01         | 0.03 | 0.00   | 0.02  | 0.01       | 0.03 | 0.01   | 0.02 | 0.01     | 0.03 |
| May | 0.01         | 0.02 | 0.02   | 0.02 | 0.01          | 0.02 | 0.01   | 0.02  | 0.02       | 0.02 | 0.02   | 0.02 | 0.01     | 0.02 |
| Jun | 0.02         | 0.01 | 0.02   | 0.01 | 0.03          | 0.01 | 0.03   | 0.01  | 0.03       | 0.01 | 0.02   | 0.01 | 0.02     | 0.01 |
| Jul | 0.02         | 0.00 | 0.02   | 0.00 | 0.02          | 0.00 | 0.02   | 0.00  | 0.02       | 0.00 | 0.02   | 0.00 | 0.02     | 0.00 |
| Aug | 0.01         | 0.00 | 0.01   | 0.00 | 0.01          | 0.00 | 0.01   | 0.00  | 0.01       | 0.00 | 0.01   | 0.00 | 0.01     | 0.00 |
| Sep | 0.01         | 0.00 | 0.01   | 0.00 | 0.01          | 0.00 | 0.01   | 0.00  | 0.01       | 0.00 | 0.00   | 0.00 | 0.01     | 0.00 |

| MD  | 2k<Elevation<3k |       |        |      |               |       |        |       |            |       |        |      |          |      |
|-----|-----------------|-------|--------|------|---------------|-------|--------|-------|------------|-------|--------|------|----------|------|
|     | cnrm-esm2-1     |       |        |      | ec-earth3-veg |       |        |       | mpi-esm1-2 |       |        |      | UCLA SWE |      |
|     | 9 km            |       | 100 km |      | 9 km          |       | 100 km |       | 9 km       |       | 100 km |      | CA       | CO   |
|     | CA              | CO    | CA     | CO   | CA            | CO    | CA     | CO    | CA         | CO    | CA     | CO   |          |      |
| Oct | 0.01            | 0.01  | 0.01   | 0.01 | 0.01          | 0.01  | 0.01   | 0.01  | 0.01       | 0.01  | 0.01   | 0.01 | 0.01     | 0.01 |
| Nov | -0.01           | 0.01  | -0.01  | 0.00 | 0.00          | 0.00  | 0.00   | -0.03 | -0.01      | 0.01  | 0.00   | 0.00 | -0.01    | 0.01 |
| Dec | -0.05           | 0.01  | -0.06  | 0.01 | -0.04         | -0.02 | -0.04  | -0.05 | -0.07      | 0.01  | -0.06  | 0.00 | -0.05    | 0.02 |
| Jan | -0.11           | -0.02 | -0.12  | 0.02 | -0.04         | -0.01 | -0.06  | -0.02 | -0.13      | -0.01 | -0.13  | 0.02 | -0.11    | 0.01 |
| Feb | -0.15           | 0.00  | -0.14  | 0.01 | -0.08         | 0.03  | -0.09  | 0.02  | -0.11      | 0.02  | -0.09  | 0.06 | -0.15    | 0.00 |
| Mar | -0.10           | 0.01  | -0.06  | 0.00 | -0.10         | 0.04  | -0.11  | 0.06  | -0.08      | 0.04  | -0.06  | 0.08 | -0.10    | 0.01 |
| Apr | -0.02           | 0.04  | 0.00   | 0.04 | -0.07         | 0.06  | -0.06  | 0.09  | -0.02      | 0.07  | -0.02  | 0.10 | -0.02    | 0.04 |
| May | -0.01           | 0.07  | 0.03   | 0.10 | 0.01          | 0.07  | 0.01   | 0.10  | 0.04       | 0.10  | 0.03   | 0.12 | -0.01    | 0.08 |
| Jun | 0.06            | 0.08  | 0.07   | 0.08 | 0.09          | 0.09  | 0.08   | 0.09  | 0.07       | 0.08  | 0.05   | 0.10 | 0.06     | 0.08 |
| Jul | 0.06            | 0.05  | 0.06   | 0.04 | 0.06          | 0.05  | 0.07   | 0.05  | 0.06       | 0.05  | 0.05   | 0.05 | 0.06     | 0.05 |
| Aug | 0.03            | 0.02  | 0.03   | 0.01 | 0.03          | 0.02  | 0.03   | 0.02  | 0.03       | 0.02  | 0.03   | 0.02 | 0.03     | 0.02 |
| Sep | 0.02            | 0.01  | 0.02   | 0.01 | 0.02          | 0.01  | 0.02   | 0.01  | 0.02       | 0.01  | 0.02   | 0.01 | 0.02     | 0.01 |

| MD  | Elevation>3k |      |        |      |               |      |        |      |            |      |        |      |          |      |
|-----|--------------|------|--------|------|---------------|------|--------|------|------------|------|--------|------|----------|------|
|     | cnrm-esm2-1  |      |        |      | ec-earth3-veg |      |        |      | mpi-esm1-2 |      |        |      | UCLA SWE |      |
|     | 9 km         |      | 100 km |      | 9 km          |      | 100 km |      | 9 km       |      | 100 km |      | CA       | CO   |
|     | CA           | CO   | CA     | CO   | CA            | CO   | CA     | CO   | CA         | CO   | CA     | CO   |          |      |
| Oct | 0.05         | 0.03 | 0.05   | 0.02 | 0.05          | 0.03 | 0.05   | 0.03 | 0.05       | 0.03 | 0.05   | 0.03 | 0.05     | 0.03 |

|      |             |       |        |       |               |       |        |       |            |       |        |      |          |       |
|------|-------------|-------|--------|-------|---------------|-------|--------|-------|------------|-------|--------|------|----------|-------|
| Nov  | 0.01        | 0.03  | 0.01   | 0.01  | 0.02          | 0.02  | 0.02   | -0.03 | 0.01       | 0.03  | 0.01   | 0.01 | 0.01     | 0.03  |
| Dec  | -0.04       | 0.01  | -0.06  | 0.02  | -0.04         | -0.01 | -0.05  | -0.06 | -0.08      | 0.02  | -0.06  | 0.01 | -0.04    | 0.04  |
| Jan  | -0.13       | -0.04 | -0.14  | 0.01  | -0.04         | -0.02 | -0.06  | -0.04 | -0.17      | -0.02 | -0.17  | 0.02 | -0.13    | 0.02  |
| Feb  | -0.18       | -0.02 | -0.16  | 0.01  | -0.08         | 0.02  | -0.10  | 0.02  | -0.14      | 0.01  | -0.11  | 0.07 | -0.18    | 0.00  |
| Mar  | -0.12       | -0.02 | -0.05  | -0.01 | -0.11         | 0.04  | -0.13  | 0.07  | -0.10      | 0.04  | -0.05  | 0.10 | -0.12    | 0.00  |
| Apr  | -0.01       | 0.02  | 0.04   | 0.01  | -0.08         | 0.04  | -0.07  | 0.11  | -0.01      | 0.06  | 0.00   | 0.14 | -0.01    | 0.01  |
| May  | 0.01        | 0.07  | 0.08   | 0.12  | 0.04          | 0.08  | 0.05   | 0.15  | 0.10       | 0.11  | 0.08   | 0.18 | 0.01     | 0.08  |
| Jun  | 0.15        | 0.15  | 0.17   | 0.14  | 0.21          | 0.16  | 0.21   | 0.18  | 0.19       | 0.14  | 0.14   | 0.20 | 0.15     | 0.15  |
| Jul  | 0.18        | 0.12  | 0.18   | 0.09  | 0.17          | 0.11  | 0.18   | 0.12  | 0.17       | 0.11  | 0.16   | 0.12 | 0.18     | 0.12  |
| Aug  | 0.11        | 0.06  | 0.11   | 0.04  | 0.11          | 0.06  | 0.11   | 0.06  | 0.11       | 0.06  | 0.10   | 0.06 | 0.11     | 0.06  |
| Sep  | 0.07        | 0.03  | 0.07   | 0.02  | 0.07          | 0.03  | 0.07   | 0.03  | 0.07       | 0.03  | 0.07   | 0.03 | 0.07     | 0.03  |
| MD   | Forest      |       |        |       |               |       |        |       |            |       |        |      |          |       |
|      | cnrm-esm2-1 |       |        |       | ec-earth3-veg |       |        |       | mpi-esm1-2 |       |        |      | UCLA SWE |       |
|      | 9 km        |       | 100 km |       | 9 km          |       | 100 km |       | 9 km       |       | 100 km |      | CA       | CO    |
|      | CA          | CO    | CA     | CO    | CA            | CO    | CA     | CO    | CA         | CO    | CA     | CO   | CA       | CO    |
| Oct  | 0.00        | 0.01  | 0.00   | 0.01  | 0.00          | 0.01  | 0.00   | 0.01  | 0.00       | 0.01  | 0.00   | 0.01 | 0.00     | 0.01  |
| Nov  | -0.02       | 0.01  | -0.02  | 0.00  | 0.00          | 0.00  | 0.00   | -0.04 | -0.01      | 0.02  | -0.01  | 0.00 | -0.02    | 0.02  |
| Dec  | -0.07       | 0.01  | -0.08  | 0.01  | -0.05         | -0.02 | -0.06  | -0.07 | -0.08      | 0.01  | -0.08  | 0.00 | -0.07    | 0.02  |
| Jan  | -0.18       | -0.04 | -0.19  | 0.02  | -0.09         | -0.02 | -0.10  | -0.04 | -0.19      | -0.02 | -0.19  | 0.02 | -0.18    | 0.01  |
| Feb  | -0.25       | -0.02 | -0.23  | 0.01  | -0.14         | 0.02  | -0.15  | 0.01  | -0.18      | 0.01  | -0.16  | 0.06 | -0.25    | 0.00  |
| Mar  | -0.19       | -0.02 | -0.14  | -0.01 | -0.18         | 0.03  | -0.19  | 0.06  | -0.16      | 0.03  | -0.13  | 0.10 | -0.19    | -0.01 |
| Apr  | -0.09       | 0.03  | -0.07  | 0.02  | -0.14         | 0.05  | -0.13  | 0.10  | -0.08      | 0.06  | -0.09  | 0.13 | -0.09    | 0.01  |
| May  | -0.06       | 0.07  | -0.03  | 0.12  | -0.04         | 0.08  | -0.04  | 0.13  | -0.02      | 0.11  | -0.03  | 0.16 | -0.06    | 0.08  |
| Jun  | 0.01        | 0.12  | 0.02   | 0.12  | 0.04          | 0.13  | 0.04   | 0.14  | 0.03       | 0.12  | 0.01   | 0.16 | 0.01     | 0.12  |
| Jul  | 0.03        | 0.08  | 0.03   | 0.06  | 0.03          | 0.08  | 0.03   | 0.08  | 0.03       | 0.08  | 0.02   | 0.09 | 0.03     | 0.08  |
| Aug  | 0.01        | 0.04  | 0.01   | 0.02  | 0.01          | 0.03  | 0.01   | 0.03  | 0.01       | 0.03  | 0.01   | 0.03 | 0.01     | 0.04  |
| Sep  | 0.00        | 0.02  | 0.00   | 0.01  | 0.00          | 0.02  | 0.00   | 0.02  | 0.00       | 0.02  | 0.00   | 0.02 | 0.00     | 0.02  |
| RMSE | NoForest    |       |        |       |               |       |        |       |            |       |        |      |          |       |
|      | cnrm-esm2-1 |       |        |       | ec-earth3-veg |       |        |       | mpi-esm1-2 |       |        |      | UCLA SWE |       |
|      | 9 km        |       | 100 km |       | 9 km          |       | 100 km |       | 9 km       |       | 100 km |      | CA       | CO    |
|      | CA          | CO    | CA     | CO    | CA            | CO    | CA     | CO    | CA         | CO    | CA     | CO   | CA       | CO    |
| Oct  | 0.01        | 0.02  | 0.01   | 0.02  | 0.01          | 0.02  | 0.01   | 0.02  | 0.01       | 0.02  | 0.01   | 0.02 | 0.01     | 0.02  |
| Nov  | -0.01       | 0.02  | -0.01  | 0.01  | 0.00          | 0.01  | 0.00   | -0.03 | 0.00       | 0.02  | 0.00   | 0.01 | -0.01    | 0.02  |
| Dec  | -0.03       | 0.01  | -0.04  | 0.02  | -0.03         | -0.01 | -0.03  | -0.06 | -0.05      | 0.01  | -0.04  | 0.01 | -0.03    | 0.03  |
| Jan  | -0.08       | -0.03 | -0.08  | 0.02  | -0.03         | -0.02 | -0.04  | -0.03 | -0.09      | -0.01 | -0.09  | 0.02 | -0.08    | 0.01  |
| Feb  | -0.11       | -0.01 | -0.10  | 0.01  | -0.05         | 0.02  | -0.05  | 0.02  | -0.07      | 0.02  | -0.06  | 0.06 | -0.11    | 0.00  |
| Mar  | -0.06       | -0.01 | -0.03  | 0.00  | -0.06         | 0.04  | -0.07  | 0.06  | -0.05      | 0.04  | -0.03  | 0.09 | -0.06    | 0.00  |
| Apr  | 0.00        | 0.03  | 0.01   | 0.03  | -0.04         | 0.05  | -0.03  | 0.10  | 0.00       | 0.06  | 0.00   | 0.12 | 0.00     | 0.02  |
| May  | 0.01        | 0.07  | 0.03   | 0.11  | 0.02          | 0.08  | 0.02   | 0.13  | 0.04       | 0.11  | 0.03   | 0.15 | 0.01     | 0.08  |
| Jun  | 0.05        | 0.12  | 0.05   | 0.11  | 0.07          | 0.13  | 0.07   | 0.14  | 0.06       | 0.11  | 0.04   | 0.15 | 0.05     | 0.12  |
| Jul  | 0.05        | 0.09  | 0.05   | 0.06  | 0.05          | 0.08  | 0.05   | 0.09  | 0.05       | 0.08  | 0.04   | 0.09 | 0.05     | 0.09  |
| Aug  | 0.03        | 0.04  | 0.03   | 0.02  | 0.03          | 0.04  | 0.03   | 0.04  | 0.03       | 0.04  | 0.02   | 0.04 | 0.03     | 0.04  |
| Sep  | 0.01        | 0.02  | 0.01   | 0.02  | 0.01          | 0.02  | 0.01   | 0.02  | 0.01       | 0.02  | 0.01   | 0.02 | 0.01     | 0.02  |
| MD   | All         |       |        |       |               |       |        |       |            |       |        |      |          |       |
|      | cnrm-esm2-1 |       |        |       | ec-earth3-veg |       |        |       | mpi-esm1-2 |       |        |      | UCLA SWE |       |
|      | 9 km        |       | 100 km |       | 9 km          |       | 100 km |       | 9 km       |       | 100 km |      | CA       | CO    |
|      | CA          | CO    | CA     | CO    | CA            | CO    | CA     | CO    | CA         | CO    | CA     | CO   | CA       | CO    |



|            |       |       |       |      |       |       |       |       |       |       |       |      |       |      |
|------------|-------|-------|-------|------|-------|-------|-------|-------|-------|-------|-------|------|-------|------|
| <b>Oct</b> | 0.01  | 0.02  | 0.01  | 0.02 | 0.01  | 0.02  | 0.01  | 0.02  | 0.01  | 0.02  | 0.01  | 0.02 | 0.01  | 0.02 |
| <b>Nov</b> | -0.01 | 0.02  | -0.01 | 0.01 | 0.00  | 0.01  | 0.00  | -0.03 | 0.00  | 0.02  | 0.00  | 0.01 | -0.01 | 0.02 |
| <b>Dec</b> | -0.03 | 0.01  | -0.04 | 0.02 | -0.03 | -0.01 | -0.03 | -0.06 | -0.05 | 0.01  | -0.04 | 0.01 | -0.03 | 0.03 |
| <b>Jan</b> | -0.08 | -0.03 | -0.08 | 0.02 | -0.03 | -0.02 | -0.04 | -0.03 | -0.09 | -0.01 | -0.09 | 0.02 | -0.08 | 0.01 |
| <b>Feb</b> | -0.11 | -0.01 | -0.10 | 0.01 | -0.05 | 0.02  | -0.06 | 0.02  | -0.08 | 0.02  | -0.06 | 0.06 | -0.11 | 0.00 |
| <b>Mar</b> | -0.07 | -0.01 | -0.04 | 0.00 | -0.07 | 0.04  | -0.07 | 0.06  | -0.05 | 0.04  | -0.03 | 0.09 | -0.07 | 0.00 |
| <b>Apr</b> | -0.01 | 0.03  | 0.01  | 0.03 | -0.04 | 0.05  | -0.03 | 0.10  | 0.00  | 0.06  | -0.01 | 0.12 | -0.01 | 0.02 |
| <b>May</b> | 0.00  | 0.07  | 0.03  | 0.11 | 0.01  | 0.08  | 0.02  | 0.13  | 0.04  | 0.11  | 0.03  | 0.15 | 0.00  | 0.08 |
| <b>Jun</b> | 0.05  | 0.12  | 0.05  | 0.11 | 0.07  | 0.13  | 0.07  | 0.14  | 0.06  | 0.11  | 0.04  | 0.15 | 0.05  | 0.12 |
| <b>Jul</b> | 0.05  | 0.09  | 0.05  | 0.06 | 0.05  | 0.08  | 0.05  | 0.09  | 0.05  | 0.08  | 0.04  | 0.09 | 0.05  | 0.09 |
| <b>Aug</b> | 0.03  | 0.04  | 0.03  | 0.02 | 0.03  | 0.04  | 0.03  | 0.04  | 0.03  | 0.04  | 0.02  | 0.04 | 0.03  | 0.04 |
| <b>Sep</b> | 0.01  | 0.02  | 0.01  | 0.02 | 0.01  | 0.02  | 0.01  | 0.02  | 0.01  | 0.02  | 0.01  | 0.02 | 0.01  | 0.02 |

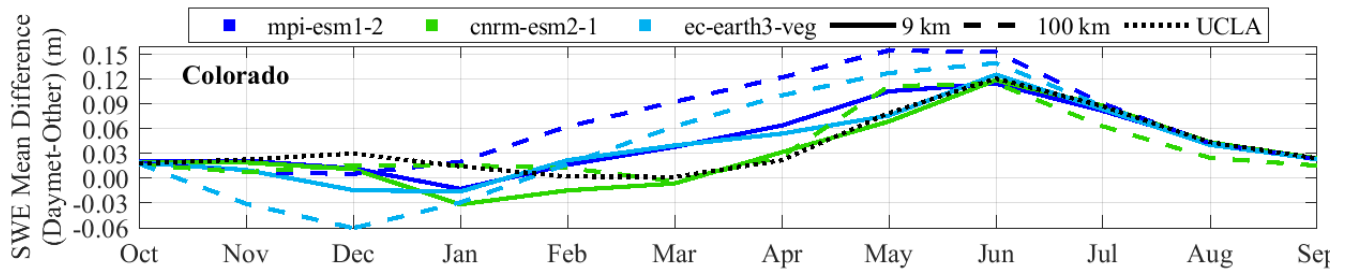

**Fig. S13.** Same as Fig. S11, but for comparison against the Daymet data.

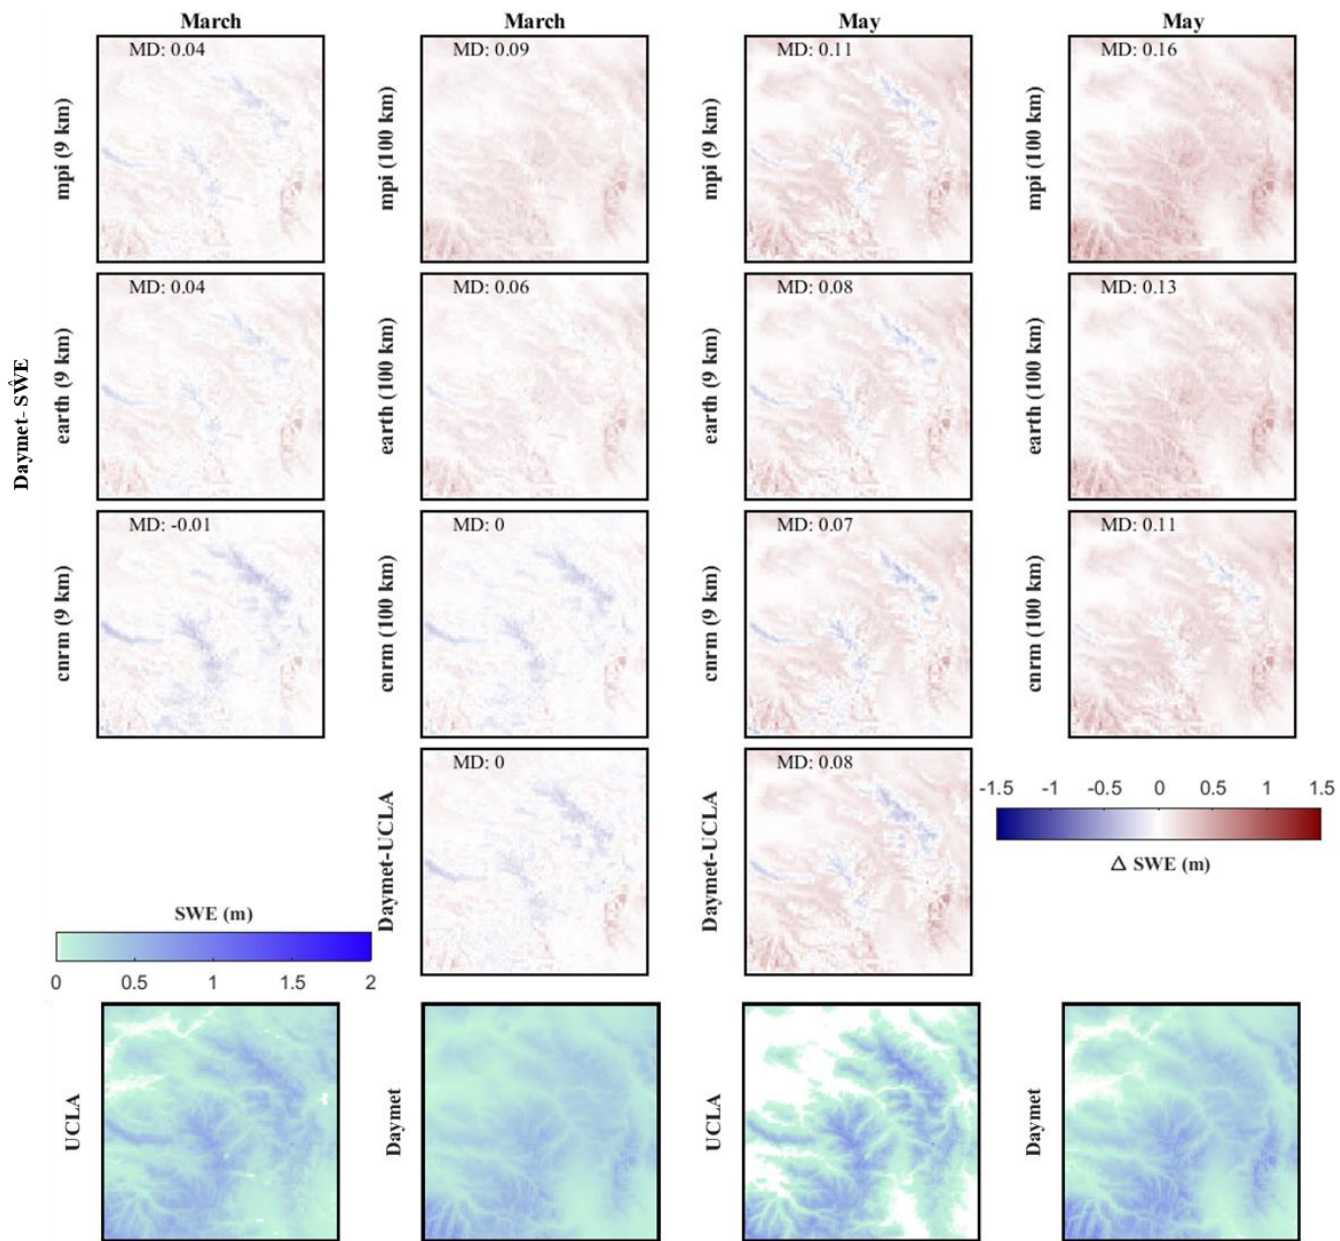

Fig. S14. Same as Fig. S12, but for comparison against the Daymet data.

Table S6. Comparison of downscaled SWE (S $\hat{W}$ E) or UCLA SWE with 4 km SWE from the University of Arizona Dataset over California (CA) and Colorado (CO). Metrics displayed include Correlation Coefficient (R), Mean Difference (MD), and Root-Mean-Squared Error (RMSE). Consideration is given only to swe values greater than 1 cm. 'Forest' denotes pixels with forest land cover, and 'NoForest' refers to non-forest pixels. The terms '9 km' and '100 km' indicate the resolutions of the climate data estimators.

| RMSE | Elevation<2k |      |        |      |               |      |        |      |            |      |        |      |          |      |
|------|--------------|------|--------|------|---------------|------|--------|------|------------|------|--------|------|----------|------|
|      | cnrm-esm2-1  |      |        |      | ec-earth3-veg |      |        |      | mpi-esm1-2 |      |        |      | UCLA SWE |      |
|      | 9 km         |      | 100 km |      | 9 km          |      | 100 km |      | 9 km       |      | 100 km |      | CA       | CO   |
|      | CA           | CO   | CA     | CO   | CA            | CO   | CA     | CO   | CA         | CO   | CA     | CO   |          |      |
| Oct  | 0.01         | 0.01 | 0.01   | 0.01 | 0.01          | 0.01 | 0.01   | 0.01 | 0.01       | 0.01 | 0.01   | 0.01 | 0.00     | 0.01 |
| Nov  | 0.03         | 0.03 | 0.03   | 0.03 | 0.02          | 0.03 | 0.02   | 0.06 | 0.02       | 0.03 | 0.02   | 0.03 | 0.01     | 0.03 |
| Dec  | 0.08         | 0.06 | 0.09   | 0.05 | 0.06          | 0.05 | 0.06   | 0.08 | 0.07       | 0.07 | 0.06   | 0.05 | 0.03     | 0.05 |
| Jan  | 0.11         | 0.08 | 0.11   | 0.07 | 0.12          | 0.07 | 0.13   | 0.07 | 0.12       | 0.07 | 0.11   | 0.07 | 0.06     | 0.07 |
| Feb  | 0.13         | 0.09 | 0.13   | 0.09 | 0.15          | 0.10 | 0.16   | 0.09 | 0.15       | 0.10 | 0.16   | 0.12 | 0.08     | 0.08 |
| Mar  | 0.18         | 0.11 | 0.20   | 0.11 | 0.17          | 0.12 | 0.17   | 0.13 | 0.18       | 0.12 | 0.20   | 0.15 | 0.11     | 0.11 |
| Apr  | 0.27         | 0.15 | 0.29   | 0.14 | 0.23          | 0.14 | 0.24   | 0.17 | 0.24       | 0.14 | 0.26   | 0.18 | 0.14     | 0.14 |
| May  | 0.26         | 0.16 | 0.27   | 0.15 | 0.26          | 0.16 | 0.26   | 0.18 | 0.27       | 0.16 | 0.27   | 0.19 | 0.15     | 0.15 |
| Jun  | 0.16         | 0.09 | 0.15   | 0.10 | 0.16          | 0.10 | 0.17   | 0.10 | 0.17       | 0.11 | 0.17   | 0.09 | 0.10     | 0.09 |
| Jul  | 0.03         | 0.02 | 0.03   | 0.05 | 0.04          | 0.03 | 0.03   | 0.02 | 0.04       | 0.03 | 0.04   | 0.02 | 0.03     | 0.02 |
| Aug  | 0.01         | 0.00 | 0.01   | 0.03 | 0.01          | 0.01 | 0.01   | 0.01 | 0.01       | 0.01 | 0.01   | 0.01 | 0.01     | 0.00 |
| Sep  | 0.01         | 0.00 | 0.00   | 0.02 | 0.00          | 0.01 | 0.00   | 0.01 | 0.01       | 0.00 | 0.01   | 0.01 | 0.00     | 0.00 |

  

| RMSE | 2k<Elevation<3k |      |        |      |               |      |        |      |            |      |        |      |          |      |
|------|-----------------|------|--------|------|---------------|------|--------|------|------------|------|--------|------|----------|------|
|      | cnrm-esm2-1     |      |        |      | ec-earth3-veg |      |        |      | mpi-esm1-2 |      |        |      | UCLA SWE |      |
|      | 9 km            |      | 100 km |      | 9 km          |      | 100 km |      | 9 km       |      | 100 km |      | CA       | CO   |
|      | CA              | CO   | CA     | CO   | CA            | CO   | CA     | CO   | CA         | CO   | CA     | CO   |          |      |
| Oct  | 0.00            | 0.00 | 0.00   | 0.00 | 0.00          | 0.00 | 0.00   | 0.00 | 0.00       | 0.00 | 0.00   | 0.00 | 0.00     | 0.00 |
| Nov  | 0.02            | 0.00 | 0.02   | 0.00 | 0.01          | 0.00 | 0.01   | 0.02 | 0.01       | 0.00 | 0.01   | 0.01 | 0.01     | 0.00 |
| Dec  | 0.05            | 0.02 | 0.05   | 0.01 | 0.04          | 0.01 | 0.04   | 0.03 | 0.04       | 0.02 | 0.04   | 0.01 | 0.02     | 0.01 |
| Jan  | 0.07            | 0.02 | 0.07   | 0.02 | 0.08          | 0.02 | 0.08   | 0.02 | 0.08       | 0.02 | 0.07   | 0.02 | 0.04     | 0.02 |
| Feb  | 0.08            | 0.02 | 0.08   | 0.03 | 0.10          | 0.03 | 0.10   | 0.03 | 0.09       | 0.03 | 0.10   | 0.03 | 0.06     | 0.02 |
| Mar  | 0.11            | 0.04 | 0.12   | 0.04 | 0.11          | 0.04 | 0.11   | 0.04 | 0.11       | 0.04 | 0.12   | 0.04 | 0.07     | 0.02 |
| Apr  | 0.16            | 0.03 | 0.17   | 0.02 | 0.14          | 0.03 | 0.14   | 0.04 | 0.15       | 0.03 | 0.15   | 0.03 | 0.09     | 0.02 |
| May  | 0.15            | 0.01 | 0.16   | 0.00 | 0.15          | 0.01 | 0.15   | 0.01 | 0.15       | 0.00 | 0.15   | 0.01 | 0.09     | 0.00 |
| Jun  | 0.09            | 0.00 | 0.08   | 0.00 | 0.08          | 0.00 | 0.09   | 0.00 | 0.09       | 0.00 | 0.09   | 0.00 | 0.05     | 0.00 |
| Jul  | 0.02            | 0.00 | 0.02   | 0.00 | 0.02          | 0.00 | 0.02   | 0.00 | 0.02       | 0.00 | 0.02   | 0.00 | 0.01     | 0.00 |
| Aug  | 0.01            | 0.00 | 0.01   | 0.00 | 0.00          | 0.00 | 0.01   | 0.00 | 0.01       | 0.00 | 0.01   | 0.00 | 0.00     | 0.00 |
| Sep  | 0.00            | 0.00 | 0.00   | 0.00 | 0.00          | 0.00 | 0.00   | 0.00 | 0.00       | 0.00 | 0.00   | 0.00 | 0.00     | 0.00 |

  

| RMSE | Elevation>3k |      |        |      |               |      |        |      |            |      |        |      |          |      |
|------|--------------|------|--------|------|---------------|------|--------|------|------------|------|--------|------|----------|------|
|      | cnrm-esm2-1  |      |        |      | ec-earth3-veg |      |        |      | mpi-esm1-2 |      |        |      | UCLA SWE |      |
|      | 9 km         |      | 100 km |      | 9 km          |      | 100 km |      | 9 km       |      | 100 km |      | CA       | CO   |
|      | CA           | CO   | CA     | CO   | CA            | CO   | CA     | CO   | CA         | CO   | CA     | CO   |          |      |
| Oct  | 0.01         | 0.01 | 0.01   | 0.01 | 0.01          | 0.01 | 0.01   | 0.01 | 0.01       | 0.01 | 0.01   | 0.01 | 0.00     | 0.01 |
| Nov  | 0.03         | 0.02 | 0.03   | 0.02 | 0.02          | 0.02 | 0.02   | 0.05 | 0.03       | 0.02 | 0.02   | 0.03 | 0.01     | 0.02 |
| Dec  | 0.09         | 0.05 | 0.10   | 0.04 | 0.07          | 0.05 | 0.07   | 0.07 | 0.09       | 0.06 | 0.07   | 0.04 | 0.03     | 0.05 |
| Jan  | 0.13         | 0.07 | 0.13   | 0.06 | 0.14          | 0.06 | 0.15   | 0.06 | 0.14       | 0.06 | 0.13   | 0.06 | 0.07     | 0.06 |
| Feb  | 0.15         | 0.08 | 0.14   | 0.08 | 0.17          | 0.09 | 0.18   | 0.08 | 0.17       | 0.09 | 0.18   | 0.10 | 0.09     | 0.07 |
| Mar  | 0.21         | 0.10 | 0.23   | 0.09 | 0.19          | 0.10 | 0.19   | 0.11 | 0.21       | 0.10 | 0.23   | 0.13 | 0.12     | 0.09 |

|             |                    |           |               |           |                      |           |               |           |                   |           |               |           |                 |           |
|-------------|--------------------|-----------|---------------|-----------|----------------------|-----------|---------------|-----------|-------------------|-----------|---------------|-----------|-----------------|-----------|
| Apr         | 0.31               | 0.13      | 0.34          | 0.12      | 0.27                 | 0.12      | 0.28          | 0.14      | 0.29              | 0.13      | 0.30          | 0.15      | 0.16            | 0.12      |
| May         | 0.31               | 0.13      | 0.33          | 0.11      | 0.30                 | 0.13      | 0.30          | 0.14      | 0.32              | 0.12      | 0.31          | 0.15      | 0.18            | 0.12      |
| Jun         | 0.19               | 0.07      | 0.18          | 0.08      | 0.19                 | 0.08      | 0.20          | 0.07      | 0.20              | 0.08      | 0.20          | 0.07      | 0.12            | 0.07      |
| Jul         | 0.04               | 0.01      | 0.04          | 0.04      | 0.04                 | 0.02      | 0.04          | 0.02      | 0.04              | 0.02      | 0.05          | 0.01      | 0.03            | 0.01      |
| Aug         | 0.01               | 0.00      | 0.01          | 0.03      | 0.01                 | 0.01      | 0.01          | 0.00      | 0.01              | 0.01      | 0.02          | 0.01      | 0.01            | 0.00      |
| Sep         | 0.01               | 0.00      | 0.01          | 0.01      | 0.00                 | 0.00      | 0.01          | 0.00      | 0.01              | 0.00      | 0.01          | 0.00      | 0.00            | 0.00      |
| <b>RMSE</b> | <b>Forest</b>      |           |               |           |                      |           |               |           |                   |           |               |           |                 |           |
|             | <b>cnrm-esm2-1</b> |           |               |           | <b>ec-earth3-veg</b> |           |               |           | <b>mpi-esm1-2</b> |           |               |           | <b>UCLA SWE</b> |           |
|             | <b>9 km</b>        |           | <b>100 km</b> |           | <b>9 km</b>          |           | <b>100 km</b> |           | <b>9 km</b>       |           | <b>100 km</b> |           | <b>CA</b>       | <b>CO</b> |
|             | <b>CA</b>          | <b>CO</b> | <b>CA</b>     | <b>CO</b> | <b>CA</b>            | <b>CO</b> | <b>CA</b>     | <b>CO</b> | <b>CA</b>         | <b>CO</b> | <b>CA</b>     | <b>CO</b> | <b>CA</b>       | <b>CO</b> |
| Oct         | 0.00               | 0.01      | 0.00          | 0.01      | 0.00                 | 0.01      | 0.00          | 0.01      | 0.00              | 0.01      | 0.00          | 0.01      | 0.00            | 0.01      |
| Nov         | 0.02               | 0.03      | 0.02          | 0.03      | 0.01                 | 0.03      | 0.01          | 0.07      | 0.02              | 0.03      | 0.02          | 0.03      | 0.01            | 0.02      |
| Dec         | 0.07               | 0.06      | 0.08          | 0.04      | 0.06                 | 0.05      | 0.05          | 0.10      | 0.07              | 0.06      | 0.06          | 0.04      | 0.04            | 0.04      |
| Jan         | 0.11               | 0.08      | 0.12          | 0.06      | 0.12                 | 0.07      | 0.12          | 0.08      | 0.12              | 0.07      | 0.11          | 0.06      | 0.07            | 0.05      |
| Feb         | 0.17               | 0.09      | 0.15          | 0.08      | 0.16                 | 0.08      | 0.17          | 0.08      | 0.15              | 0.09      | 0.16          | 0.10      | 0.11            | 0.06      |
| Mar         | 0.18               | 0.10      | 0.18          | 0.09      | 0.16                 | 0.10      | 0.16          | 0.10      | 0.17              | 0.09      | 0.18          | 0.13      | 0.15            | 0.07      |
| Apr         | 0.22               | 0.13      | 0.24          | 0.12      | 0.21                 | 0.11      | 0.21          | 0.13      | 0.21              | 0.11      | 0.22          | 0.15      | 0.17            | 0.11      |
| May         | 0.17               | 0.16      | 0.17          | 0.11      | 0.16                 | 0.15      | 0.16          | 0.15      | 0.16              | 0.13      | 0.17          | 0.16      | 0.12            | 0.13      |
| Jun         | 0.06               | 0.08      | 0.06          | 0.09      | 0.04                 | 0.09      | 0.05          | 0.08      | 0.05              | 0.11      | 0.07          | 0.07      | 0.04            | 0.08      |
| Jul         | 0.01               | 0.02      | 0.01          | 0.07      | 0.01                 | 0.03      | 0.01          | 0.02      | 0.01              | 0.03      | 0.01          | 0.01      | 0.00            | 0.02      |
| Aug         | 0.00               | 0.00      | 0.00          | 0.04      | 0.00                 | 0.01      | 0.00          | 0.01      | 0.00              | 0.01      | 0.00          | 0.01      | 0.00            | 0.00      |
| Sep         | 0.00               | 0.00      | 0.00          | 0.02      | 0.00                 | 0.01      | 0.00          | 0.01      | 0.00              | 0.00      | 0.00          | 0.01      | 0.00            | 0.00      |
| <b>RMSE</b> | <b>NoForest</b>    |           |               |           |                      |           |               |           |                   |           |               |           |                 |           |
|             | <b>cnrm-esm2-1</b> |           |               |           | <b>ec-earth3-veg</b> |           |               |           | <b>mpi-esm1-2</b> |           |               |           | <b>UCLA SWE</b> |           |
|             | <b>9 km</b>        |           | <b>100 km</b> |           | <b>9 km</b>          |           | <b>100 km</b> |           | <b>9 km</b>       |           | <b>100 km</b> |           | <b>CA</b>       | <b>CO</b> |
|             | <b>CA</b>          | <b>CO</b> | <b>CA</b>     | <b>CO</b> | <b>CA</b>            | <b>CO</b> | <b>CA</b>     | <b>CO</b> | <b>CA</b>         | <b>CO</b> | <b>CA</b>     | <b>CO</b> | <b>CA</b>       | <b>CO</b> |
| Oct         | 0.01               | 0.01      | 0.01          | 0.01      | 0.01                 | 0.01      | 0.01          | 0.01      | 0.01              | 0.01      | 0.01          | 0.01      | 0.00            | 0.01      |
| Nov         | 0.03               | 0.03      | 0.03          | 0.03      | 0.02                 | 0.03      | 0.02          | 0.06      | 0.02              | 0.03      | 0.02          | 0.03      | 0.01            | 0.03      |
| Dec         | 0.08               | 0.06      | 0.09          | 0.05      | 0.06                 | 0.05      | 0.06          | 0.08      | 0.07              | 0.07      | 0.06          | 0.05      | 0.03            | 0.05      |
| Jan         | 0.11               | 0.08      | 0.11          | 0.07      | 0.12                 | 0.07      | 0.13          | 0.07      | 0.12              | 0.07      | 0.11          | 0.07      | 0.06            | 0.07      |
| Feb         | 0.13               | 0.09      | 0.12          | 0.09      | 0.15                 | 0.10      | 0.16          | 0.09      | 0.14              | 0.10      | 0.16          | 0.12      | 0.08            | 0.09      |
| Mar         | 0.18               | 0.11      | 0.20          | 0.11      | 0.17                 | 0.12      | 0.17          | 0.13      | 0.18              | 0.12      | 0.20          | 0.15      | 0.11            | 0.11      |
| Apr         | 0.27               | 0.15      | 0.28          | 0.14      | 0.23                 | 0.14      | 0.24          | 0.17      | 0.24              | 0.14      | 0.26          | 0.19      | 0.14            | 0.14      |
| May         | 0.26               | 0.16      | 0.27          | 0.15      | 0.25                 | 0.16      | 0.25          | 0.18      | 0.27              | 0.16      | 0.26          | 0.19      | 0.15            | 0.15      |
| Jun         | 0.16               | 0.09      | 0.15          | 0.10      | 0.16                 | 0.10      | 0.17          | 0.10      | 0.17              | 0.10      | 0.17          | 0.09      | 0.10            | 0.09      |
| Jul         | 0.03               | 0.02      | 0.03          | 0.05      | 0.04                 | 0.03      | 0.03          | 0.02      | 0.04              | 0.03      | 0.04          | 0.02      | 0.03            | 0.02      |
| Aug         | 0.01               | 0.00      | 0.01          | 0.03      | 0.01                 | 0.01      | 0.01          | 0.01      | 0.01              | 0.01      | 0.01          | 0.01      | 0.01            | 0.00      |
| Sep         | 0.01               | 0.00      | 0.00          | 0.02      | 0.00                 | 0.01      | 0.00          | 0.01      | 0.01              | 0.00      | 0.01          | 0.01      | 0.00            | 0.00      |
| <b>RMSE</b> | <b>All</b>         |           |               |           |                      |           |               |           |                   |           |               |           |                 |           |
|             | <b>cnrm-esm2-1</b> |           |               |           | <b>ec-earth3-veg</b> |           |               |           | <b>mpi-esm1-2</b> |           |               |           | <b>UCLA SWE</b> |           |
|             | <b>9 km</b>        |           | <b>100 km</b> |           | <b>9 km</b>          |           | <b>100 km</b> |           | <b>9 km</b>       |           | <b>100 km</b> |           | <b>CA</b>       | <b>CO</b> |
|             | <b>CA</b>          | <b>CO</b> | <b>CA</b>     | <b>CO</b> | <b>CA</b>            | <b>CO</b> | <b>CA</b>     | <b>CO</b> | <b>CA</b>         | <b>CO</b> | <b>CA</b>     | <b>CO</b> | <b>CA</b>       | <b>CO</b> |
| Oct         | 0.01               | 0.01      | 0.01          | 0.02      | 0.01                 | 0.01      | 0.01          | 0.01      | 0.01              | 0.01      | 0.01          | 0.02      | 0.01            | 0.01      |
| Nov         | 0.04               | 0.04      | 0.04          | 0.04      | 0.03                 | 0.04      | 0.03          | 0.06      | 0.03              | 0.04      | 0.03          | 0.04      | 0.02            | 0.03      |
| Dec         | 0.10               | 0.07      | 0.12          | 0.06      | 0.08                 | 0.06      | 0.08          | 0.09      | 0.09              | 0.07      | 0.08          | 0.06      | 0.04            | 0.06      |
| Jan         | 0.14               | 0.08      | 0.14          | 0.08      | 0.17                 | 0.07      | 0.17          | 0.08      | 0.16              | 0.08      | 0.14          | 0.08      | 0.07            | 0.07      |
| Feb         | 0.16               | 0.10      | 0.15          | 0.09      | 0.20                 | 0.10      | 0.20          | 0.09      | 0.19              | 0.10      | 0.21          | 0.12      | 0.10            | 0.09      |

|          |                              |           |               |           |                      |           |               |           |                   |           |               |           |                 |           |
|----------|------------------------------|-----------|---------------|-----------|----------------------|-----------|---------------|-----------|-------------------|-----------|---------------|-----------|-----------------|-----------|
| Mar      | 0.23                         | 0.11      | 0.26          | 0.11      | 0.23                 | 0.12      | 0.23          | 0.13      | 0.24              | 0.12      | 0.28          | 0.15      | 0.13            | 0.11      |
| Apr      | 0.36                         | 0.15      | 0.39          | 0.14      | 0.31                 | 0.14      | 0.32          | 0.18      | 0.33              | 0.15      | 0.35          | 0.20      | 0.18            | 0.14      |
| May      | 0.39                         | 0.17      | 0.41          | 0.17      | 0.38                 | 0.17      | 0.38          | 0.20      | 0.40              | 0.18      | 0.39          | 0.22      | 0.23            | 0.17      |
| Jun      | 0.26                         | 0.10      | 0.25          | 0.11      | 0.27                 | 0.11      | 0.28          | 0.11      | 0.28              | 0.12      | 0.28          | 0.11      | 0.17            | 0.10      |
| Jul      | 0.05                         | 0.02      | 0.05          | 0.06      | 0.06                 | 0.03      | 0.05          | 0.02      | 0.06              | 0.03      | 0.07          | 0.02      | 0.04            | 0.02      |
| Aug      | 0.01                         | 0.00      | 0.02          | 0.04      | 0.01                 | 0.01      | 0.02          | 0.01      | 0.02              | 0.01      | 0.02          | 0.01      | 0.01            | 0.00      |
| Sep      | 0.01                         | 0.00      | 0.01          | 0.02      | 0.01                 | 0.01      | 0.01          | 0.01      | 0.01              | 0.00      | 0.01          | 0.01      | 0.01            | 0.00      |
| <b>R</b> | <b>Elevation&lt;2k</b>       |           |               |           |                      |           |               |           |                   |           |               |           |                 |           |
|          | <b>cnrm-esm2-1</b>           |           |               |           | <b>ec-earth3-veg</b> |           |               |           | <b>mpi-esm1-2</b> |           |               |           | <b>UCLA SWE</b> |           |
|          | <b>9 km</b>                  |           | <b>100 km</b> |           | <b>9 km</b>          |           | <b>100 km</b> |           | <b>9 km</b>       |           | <b>100 km</b> |           | <b>CA</b>       | <b>CO</b> |
|          | <b>CA</b>                    | <b>CO</b> | <b>CA</b>     | <b>CO</b> | <b>CA</b>            | <b>CO</b> | <b>CA</b>     | <b>CO</b> | <b>CA</b>         | <b>CO</b> | <b>CA</b>     | <b>CO</b> | <b>CA</b>       | <b>CO</b> |
| Oct      | 0.30                         | NaN       | 0.31          | NaN       | 0.40                 | NaN       | 0.39          | NaN       | 0.31              | NaN       | 0.37          | NaN       | 0.27            | NaN       |
| Nov      | 0.50                         | NaN       | 0.50          | NaN       | 0.51                 | NaN       | 0.46          | NaN       | 0.48              | NaN       | 0.47          | NaN       | 0.32            | NaN       |
| Dec      | 0.83                         | NaN       | 0.83          | NaN       | 0.83                 | NaN       | 0.83          | NaN       | 0.82              | NaN       | 0.82          | NaN       | 0.84            | NaN       |
| Jan      | 0.94                         | NaN       | 0.94          | NaN       | 0.94                 | NaN       | 0.94          | NaN       | 0.94              | NaN       | 0.94          | NaN       | 0.94            | NaN       |
| Feb      | 0.93                         | NaN       | 0.93          | NaN       | 0.94                 | NaN       | 0.94          | NaN       | 0.94              | NaN       | 0.94          | NaN       | 0.94            | NaN       |
| Mar      | 0.92                         | NaN       | 0.92          | NaN       | 0.92                 | NaN       | 0.92          | NaN       | 0.93              | NaN       | 0.93          | NaN       | 0.92            | NaN       |
| Apr      | 0.89                         | NaN       | 0.89          | NaN       | 0.88                 | NaN       | 0.88          | NaN       | 0.89              | NaN       | 0.89          | NaN       | 0.88            | NaN       |
| May      | 0.80                         | NaN       | 0.80          | NaN       | 0.79                 | NaN       | 0.79          | NaN       | 0.79              | NaN       | 0.79          | NaN       | 0.82            | NaN       |
| Jun      | 0.64                         | NaN       | 0.64          | NaN       | 0.66                 | NaN       | 0.66          | NaN       | 0.65              | NaN       | 0.64          | NaN       | 0.74            | NaN       |
| Jul      | 0.42                         | NaN       | 0.44          | NaN       | 0.43                 | NaN       | 0.44          | NaN       | 0.44              | NaN       | 0.44          | NaN       | 0.53            | NaN       |
| Aug      | NaN                          | NaN       | NaN           | NaN       | NaN                  | NaN       | NaN           | NaN       | NaN               | NaN       | NaN           | NaN       | NaN             | NaN       |
| Sep      | 0.41                         | NaN       | 0.39          | NaN       | 0.27                 | NaN       | 0.31          | NaN       | 0.34              | NaN       | 0.29          | NaN       | NaN             | NaN       |
| <b>R</b> | <b>2k&lt;Elevation&lt;3k</b> |           |               |           |                      |           |               |           |                   |           |               |           |                 |           |
|          | <b>cnrm-esm2-1</b>           |           |               |           | <b>ec-earth3-veg</b> |           |               |           | <b>mpi-esm1-2</b> |           |               |           | <b>UCLA SWE</b> |           |
|          | <b>9 km</b>                  |           | <b>100 km</b> |           | <b>9 km</b>          |           | <b>100 km</b> |           | <b>9 km</b>       |           | <b>100 km</b> |           | <b>CA</b>       | <b>CO</b> |
|          | <b>CA</b>                    | <b>CO</b> | <b>CA</b>     | <b>CO</b> | <b>CA</b>            | <b>CO</b> | <b>CA</b>     | <b>CO</b> | <b>CA</b>         | <b>CO</b> | <b>CA</b>     | <b>CO</b> | <b>CA</b>       | <b>CO</b> |
| Oct      | 0.34                         | 0.38      | 0.33          | 0.34      | 0.43                 | 0.38      | 0.40          | 0.30      | 0.33              | 0.41      | 0.42          | 0.30      | 0.31            | 0.33      |
| Nov      | 0.48                         | 0.56      | 0.47          | 0.58      | 0.51                 | 0.56      | 0.48          | 0.57      | 0.48              | 0.56      | 0.45          | 0.56      | 0.34            | 0.52      |
| Dec      | 0.82                         | 0.81      | 0.82          | 0.82      | 0.81                 | 0.82      | 0.82          | 0.82      | 0.81              | 0.80      | 0.81          | 0.82      | 0.83            | 0.78      |
| Jan      | 0.93                         | 0.79      | 0.93          | 0.80      | 0.92                 | 0.80      | 0.93          | 0.81      | 0.93              | 0.79      | 0.93          | 0.80      | 0.92            | 0.78      |
| Feb      | 0.92                         | 0.79      | 0.92          | 0.78      | 0.93                 | 0.80      | 0.93          | 0.80      | 0.93              | 0.79      | 0.93          | 0.79      | 0.92            | 0.77      |
| Mar      | 0.92                         | 0.80      | 0.92          | 0.80      | 0.92                 | 0.81      | 0.92          | 0.81      | 0.92              | 0.80      | 0.93          | 0.80      | 0.92            | 0.77      |
| Apr      | 0.89                         | 0.76      | 0.89          | 0.76      | 0.89                 | 0.76      | 0.89          | 0.77      | 0.90              | 0.76      | 0.90          | 0.76      | 0.89            | 0.73      |
| May      | 0.82                         | 0.55      | 0.82          | 0.54      | 0.83                 | 0.55      | 0.82          | 0.56      | 0.82              | 0.53      | 0.82          | 0.54      | 0.84            | 0.46      |
| Jun      | 0.68                         | 0.35      | 0.68          | 0.31      | 0.70                 | 0.37      | 0.69          | 0.36      | 0.69              | 0.31      | 0.68          | 0.40      | 0.75            | 0.23      |
| Jul      | 0.45                         | 0.61      | 0.47          | 0.57      | 0.46                 | 0.66      | 0.46          | 0.61      | 0.46              | 0.59      | 0.47          | 0.51      | 0.54            | 0.47      |
| Aug      | NaN                          | NaN       | NaN           | 0.46      | NaN                  | -1.00     | NaN           | -1.00     | NaN               | NaN       | NaN           | NaN       | NaN             | -1.00     |
| Sep      | 0.41                         | 0.46      | 0.38          | 0.36      | 0.18                 | 0.45      | 0.32          | 0.26      | 0.32              | 0.31      | 0.28          | 0.30      | NaN             | 0.56      |
| <b>R</b> | <b>Elevation&gt;3k</b>       |           |               |           |                      |           |               |           |                   |           |               |           |                 |           |
|          | <b>cnrm-esm2-1</b>           |           |               |           | <b>ec-earth3-veg</b> |           |               |           | <b>mpi-esm1-2</b> |           |               |           | <b>UCLA SWE</b> |           |
|          | <b>9 km</b>                  |           | <b>100 km</b> |           | <b>9 km</b>          |           | <b>100 km</b> |           | <b>9 km</b>       |           | <b>100 km</b> |           | <b>CA</b>       | <b>CO</b> |
|          | <b>CA</b>                    | <b>CO</b> | <b>CA</b>     | <b>CO</b> | <b>CA</b>            | <b>CO</b> | <b>CA</b>     | <b>CO</b> | <b>CA</b>         | <b>CO</b> | <b>CA</b>     | <b>CO</b> | <b>CA</b>       | <b>CO</b> |
| Oct      | 0.40                         | 0.36      | 0.36          | 0.24      | 0.55                 | 0.30      | 0.46          | 0.22      | 0.35              | 0.40      | 0.50          | 0.22      | 0.41            | 0.25      |
| Nov      | 0.55                         | 0.42      | 0.56          | 0.44      | 0.56                 | 0.38      | 0.52          | 0.39      | 0.53              | 0.40      | 0.52          | 0.40      | 0.50            | 0.43      |
| Dec      | 0.85                         | 0.75      | 0.85          | 0.75      | 0.85                 | 0.71      | 0.85          | 0.71      | 0.85              | 0.72      | 0.85          | 0.73      | 0.87            | 0.68      |
| Jan      | 0.96                         | 0.74      | 0.96          | 0.75      | 0.96                 | 0.74      | 0.96          | 0.75      | 0.96              | 0.73      | 0.96          | 0.75      | 0.95            | 0.72      |

|     |       |      |       |      |      |       |       |       |       |      |       |      |      |       |
|-----|-------|------|-------|------|------|-------|-------|-------|-------|------|-------|------|------|-------|
| Feb | 0.96  | 0.74 | 0.96  | 0.74 | 0.96 | 0.75  | 0.96  | 0.76  | 0.96  | 0.74 | 0.96  | 0.75 | 0.95 | 0.72  |
| Mar | 0.95  | 0.76 | 0.95  | 0.74 | 0.95 | 0.76  | 0.96  | 0.76  | 0.95  | 0.75 | 0.95  | 0.75 | 0.95 | 0.72  |
| Apr | 0.92  | 0.71 | 0.92  | 0.71 | 0.93 | 0.72  | 0.93  | 0.70  | 0.93  | 0.71 | 0.93  | 0.69 | 0.93 | 0.68  |
| May | 0.83  | 0.43 | 0.84  | 0.41 | 0.84 | 0.43  | 0.84  | 0.42  | 0.84  | 0.40 | 0.84  | 0.38 | 0.86 | 0.36  |
| Jun | 0.71  | 0.23 | 0.72  | 0.19 | 0.73 | 0.24  | 0.72  | 0.23  | 0.71  | 0.19 | 0.72  | 0.29 | 0.75 | 0.15  |
| Jul | 0.40  | 0.64 | 0.39  | 0.58 | 0.39 | 0.69  | 0.36  | 0.66  | 0.43  | 0.62 | 0.45  | 0.60 | 0.58 | 0.48  |
| Aug | NaN   | NaN  | NaN   | 0.56 | NaN  | -1.00 | NaN   | -1.00 | NaN   | NaN  | NaN   | NaN  | NaN  | -1.00 |
| Sep | -0.20 | 0.57 | -0.22 | 0.39 | 0.15 | 0.50  | -0.63 | 0.29  | -0.35 | 0.41 | -0.50 | 0.42 | NaN  | 0.53  |

| R   | Forest      |       |        |       |               |       |        |       |            |       |        |       |          |      |
|-----|-------------|-------|--------|-------|---------------|-------|--------|-------|------------|-------|--------|-------|----------|------|
|     | cnrm-esm2-1 |       |        |       | ec-earth3-veg |       |        |       | mpi-esm1-2 |       |        |       | UCLA SWE |      |
|     | 9 km        |       | 100 km |       | 9 km          |       | 100 km |       | 9 km       |       | 100 km |       | CA       | CO   |
|     | CA          | CO    | CA     | CO    | CA            | CO    | CA     | CO    | CA         | CO    | CA     | CO    |          |      |
| Oct | NaN         | 0.11  | NaN    | 0.31  | NaN           | 0.19  | NaN    | 0.25  | NaN        | 0.12  | NaN    | 0.29  | 1.00     | 0.51 |
| Nov | 0.16        | 0.67  | 0.16   | 0.70  | 0.15          | 0.63  | 0.02   | 0.64  | 0.22       | 0.62  | 0.17   | 0.67  | 0.69     | 0.65 |
| Dec | 0.67        | 0.88  | 0.67   | 0.87  | 0.65          | 0.86  | 0.64   | 0.85  | 0.65       | 0.86  | 0.66   | 0.87  | 0.58     | 0.85 |
| Jan | 0.83        | 0.86  | 0.83   | 0.86  | 0.83          | 0.85  | 0.84   | 0.86  | 0.86       | 0.86  | 0.86   | 0.86  | 0.79     | 0.84 |
| Feb | 0.79        | 0.86  | 0.80   | 0.85  | 0.82          | 0.86  | 0.82   | 0.86  | 0.82       | 0.86  | 0.82   | 0.86  | 0.80     | 0.84 |
| Mar | 0.85        | 0.88  | 0.85   | 0.88  | 0.86          | 0.88  | 0.85   | 0.88  | 0.85       | 0.88  | 0.85   | 0.87  | 0.78     | 0.87 |
| Apr | 0.80        | 0.88  | 0.79   | 0.88  | 0.80          | 0.87  | 0.79   | 0.87  | 0.79       | 0.88  | 0.79   | 0.87  | 0.74     | 0.86 |
| May | 0.73        | 0.70  | 0.74   | 0.71  | 0.72          | 0.69  | 0.73   | 0.70  | 0.70       | 0.71  | 0.69   | 0.67  | 0.76     | 0.67 |
| Jun | 0.89        | 0.13  | 0.90   | 0.09  | 0.90          | 0.09  | 0.89   | 0.12  | 0.87       | 0.07  | 0.88   | 0.13  | 0.95     | 0.22 |
| Jul | NaN         | -0.72 | NaN    | -0.85 | NaN           | -0.88 | NaN    | -0.80 | NaN        | -0.78 | NaN    | -0.29 | NaN      | 0.23 |
| Aug | NaN         | NaN   | NaN    | NaN   | NaN           | NaN   | NaN    | NaN   | NaN        | NaN   | NaN    | NaN   | NaN      | NaN  |
| Sep | NaN         | -1.00 | NaN    | 0.14  | NaN           | -0.10 | NaN    | 0.34  | NaN        | -1.00 | NaN    | 1.00  | NaN      | 0.37 |

| R   | NoForest    |      |        |      |               |       |        |       |            |      |        |      |          |       |
|-----|-------------|------|--------|------|---------------|-------|--------|-------|------------|------|--------|------|----------|-------|
|     | cnrm-esm2-1 |      |        |      | ec-earth3-veg |       |        |       | mpi-esm1-2 |      |        |      | UCLA SWE |       |
|     | 9 km        |      | 100 km |      | 9 km          |       | 100 km |       | 9 km       |      | 100 km |      | CA       | CO    |
|     | CA          | CO   | CA     | CO   | CA            | CO    | CA     | CO    | CA         | CO   | CA     | CO   |          |       |
| Oct | 0.32        | 0.39 | 0.32   | 0.32 | 0.42          | 0.36  | 0.39   | 0.29  | 0.32       | 0.41 | 0.40   | 0.27 | 0.30     | 0.31  |
| Nov | 0.48        | 0.50 | 0.48   | 0.52 | 0.51          | 0.49  | 0.47   | 0.50  | 0.48       | 0.50 | 0.45   | 0.50 | 0.33     | 0.49  |
| Dec | 0.82        | 0.79 | 0.82   | 0.80 | 0.82          | 0.79  | 0.83   | 0.79  | 0.82       | 0.78 | 0.82   | 0.79 | 0.83     | 0.75  |
| Jan | 0.93        | 0.77 | 0.93   | 0.78 | 0.93          | 0.78  | 0.93   | 0.79  | 0.94       | 0.77 | 0.94   | 0.78 | 0.93     | 0.76  |
| Feb | 0.93        | 0.77 | 0.93   | 0.77 | 0.93          | 0.78  | 0.93   | 0.79  | 0.94       | 0.77 | 0.93   | 0.78 | 0.93     | 0.75  |
| Mar | 0.93        | 0.78 | 0.93   | 0.78 | 0.93          | 0.79  | 0.93   | 0.80  | 0.93       | 0.78 | 0.93   | 0.79 | 0.92     | 0.75  |
| Apr | 0.89        | 0.74 | 0.89   | 0.74 | 0.89          | 0.75  | 0.89   | 0.75  | 0.90       | 0.74 | 0.90   | 0.74 | 0.89     | 0.71  |
| May | 0.82        | 0.50 | 0.82   | 0.49 | 0.82          | 0.51  | 0.82   | 0.51  | 0.82       | 0.48 | 0.82   | 0.48 | 0.84     | 0.42  |
| Jun | 0.67        | 0.36 | 0.67   | 0.32 | 0.69          | 0.38  | 0.68   | 0.37  | 0.68       | 0.32 | 0.67   | 0.40 | 0.75     | 0.25  |
| Jul | 0.44        | 0.62 | 0.46   | 0.58 | 0.45          | 0.67  | 0.45   | 0.64  | 0.46       | 0.61 | 0.46   | 0.54 | 0.53     | 0.48  |
| Aug | NaN         | NaN  | NaN    | 0.53 | NaN           | -1.00 | NaN    | -1.00 | NaN        | NaN  | NaN    | NaN  | NaN      | -1.00 |
| Sep | 0.40        | 0.52 | 0.38   | 0.37 | 0.20          | 0.48  | 0.31   | 0.26  | 0.32       | 0.37 | 0.28   | 0.36 | NaN      | 0.55  |

| R   | All         |      |        |      |               |      |        |      |            |      |        |      |          |      |
|-----|-------------|------|--------|------|---------------|------|--------|------|------------|------|--------|------|----------|------|
|     | cnrm-esm2-1 |      |        |      | ec-earth3-veg |      |        |      | mpi-esm1-2 |      |        |      | UCLA SWE |      |
|     | 9 km        |      | 100 km |      | 9 km          |      | 100 km |      | 9 km       |      | 100 km |      | CA       | CO   |
|     | CA          | CO   | CA     | CO   | CA            | CO   | CA     | CO   | CA         | CO   | CA     | CO   |          |      |
| Oct | 0.32        | 0.38 | 0.32   | 0.31 | 0.42          | 0.35 | 0.39   | 0.28 | 0.32       | 0.41 | 0.40   | 0.27 | 0.30     | 0.31 |
| Nov | 0.48        | 0.50 | 0.48   | 0.52 | 0.51          | 0.49 | 0.47   | 0.49 | 0.48       | 0.49 | 0.45   | 0.49 | 0.33     | 0.48 |
| Dec | 0.82        | 0.79 | 0.82   | 0.80 | 0.82          | 0.79 | 0.83   | 0.78 | 0.82       | 0.78 | 0.82   | 0.79 | 0.83     | 0.75 |

|     |      |      |      |      |      |       |      |       |      |      |      |      |      |       |
|-----|------|------|------|------|------|-------|------|-------|------|------|------|------|------|-------|
| Jan | 0.93 | 0.77 | 0.93 | 0.78 | 0.93 | 0.78  | 0.93 | 0.79  | 0.94 | 0.77 | 0.94 | 0.78 | 0.93 | 0.76  |
| Feb | 0.93 | 0.77 | 0.93 | 0.77 | 0.93 | 0.78  | 0.93 | 0.79  | 0.93 | 0.77 | 0.93 | 0.78 | 0.93 | 0.75  |
| Mar | 0.92 | 0.79 | 0.92 | 0.78 | 0.92 | 0.79  | 0.92 | 0.80  | 0.93 | 0.78 | 0.93 | 0.79 | 0.92 | 0.75  |
| Apr | 0.89 | 0.74 | 0.89 | 0.74 | 0.89 | 0.75  | 0.89 | 0.75  | 0.90 | 0.74 | 0.90 | 0.74 | 0.89 | 0.71  |
| May | 0.82 | 0.50 | 0.82 | 0.48 | 0.82 | 0.50  | 0.82 | 0.50  | 0.82 | 0.48 | 0.82 | 0.48 | 0.84 | 0.41  |
| Jun | 0.67 | 0.34 | 0.67 | 0.30 | 0.69 | 0.36  | 0.68 | 0.35  | 0.68 | 0.31 | 0.68 | 0.39 | 0.75 | 0.24  |
| Jul | 0.44 | 0.63 | 0.46 | 0.58 | 0.46 | 0.67  | 0.45 | 0.64  | 0.46 | 0.61 | 0.47 | 0.55 | 0.53 | 0.48  |
| Aug | NaN  | NaN  | NaN  | 0.54 | NaN  | -1.00 | NaN  | -1.00 | NaN  | NaN  | NaN  | NaN  | NaN  | -1.00 |
| Sep | 0.40 | 0.52 | 0.38 | 0.37 | 0.19 | 0.48  | 0.31 | 0.26  | 0.32 | 0.37 | 0.27 | 0.37 | NaN  | 0.55  |

| MD  |      | Elevation<2k |      |        |      |               |      |        |      |            |       |        |      | UCLA SWE |  |
|-----|------|--------------|------|--------|------|---------------|------|--------|------|------------|-------|--------|------|----------|--|
|     |      | cnrm-esm2-1  |      |        |      | ec-earth3-veg |      |        |      | mpi-esm1-2 |       |        |      |          |  |
|     |      | 9 km         |      | 100 km |      | 9 km          |      | 100 km |      | 9 km       |       | 100 km |      |          |  |
|     |      | CA           | CO   | CA     | CO   | CA            | CO   | CA     | CO   | CA         | CO    | CA     | CO   |          |  |
| Oct | 0.00 | 0.00         | 0.00 | 0.00   | 0.00 | 0.00          | 0.00 | 0.00   | 0.00 | 0.00       | 0.00  | 0.00   | 0.00 | 0.00     |  |
| Nov | 0.00 | 0.00         | 0.00 | 0.00   | 0.00 | 0.00          | 0.00 | -0.02  | 0.00 | 0.00       | 0.00  | -0.01  | 0.00 | 0.00     |  |
| Dec | 0.00 | 0.01         | 0.00 | 0.01   | 0.00 | -0.01         | 0.00 | -0.03  | 0.00 | 0.01       | 0.00  | 0.00   | 0.00 | 0.01     |  |
| Jan | 0.01 | 0.01         | 0.01 | 0.02   | 0.03 | 0.01          | 0.03 | 0.01   | 0.01 | 0.01       | 0.01  | 0.02   | 0.01 | 0.01     |  |
| Feb | 0.01 | 0.02         | 0.01 | 0.01   | 0.03 | 0.03          | 0.03 | 0.03   | 0.02 | 0.03       | 0.03  | 0.03   | 0.01 | -0.01    |  |
| Mar | 0.03 | 0.01         | 0.04 | -0.01  | 0.03 | 0.02          | 0.03 | 0.01   | 0.04 | 0.01       | 0.04  | 0.01   | 0.02 | -0.01    |  |
| Apr | 0.04 | -0.02        | 0.05 | -0.01  | 0.03 | -0.02         | 0.03 | -0.03  | 0.04 | -0.01      | 0.04  | -0.03  | 0.02 | -0.01    |  |
| May | 0.01 | -0.01        | 0.02 | 0.00   | 0.02 | -0.01         | 0.02 | -0.01  | 0.03 | 0.00       | 0.02  | -0.01  | 0.01 | 0.00     |  |
| Jun | 0.00 | 0.00         | 0.00 | 0.00   | 0.01 | 0.00          | 0.01 | 0.00   | 0.00 | 0.00       | 0.00  | 0.00   | 0.00 | 0.00     |  |
| Jul | 0.00 | 0.00         | 0.00 | 0.00   | 0.00 | 0.00          | 0.00 | 0.00   | 0.00 | 0.00       | -0.01 | 0.00   | 0.00 | 0.00     |  |
| Aug | 0.00 | 0.00         | 0.00 | 0.00   | 0.00 | 0.00          | 0.00 | 0.00   | 0.00 | 0.00       | 0.00  | 0.00   | 0.00 | 0.00     |  |
| Sep | 0.00 | 0.00         | 0.00 | 0.00   | 0.00 | 0.00          | 0.00 | 0.00   | 0.00 | 0.00       | 0.00  | 0.00   | 0.00 | 0.00     |  |

| MD  |       | 2k<Elevation<3k |       |        |       |               |       |        |       |            |       |        |       | UCLA SWE |  |
|-----|-------|-----------------|-------|--------|-------|---------------|-------|--------|-------|------------|-------|--------|-------|----------|--|
|     |       | cnrm-esm2-1     |       |        |       | ec-earth3-veg |       |        |       | mpi-esm1-2 |       |        |       |          |  |
|     |       | 9 km            |       | 100 km |       | 9 km          |       | 100 km |       | 9 km       |       | 100 km |       |          |  |
|     |       | CA              | CO    | CA     | CO    | CA            | CO    | CA     | CO    | CA         | CO    | CA     | CO    |          |  |
| Oct | 0.00  | 0.00            | 0.00  | 0.00   | 0.00  | 0.00          | 0.00  | 0.00   | 0.00  | 0.00       | 0.00  | 0.00   | 0.00  | 0.00     |  |
| Nov | -0.01 | 0.01            | -0.01 | 0.00   | 0.00  | 0.00          | 0.00  | -0.04  | -0.01 | 0.01       | -0.01 | 0.00   | 0.00  | 0.01     |  |
| Dec | -0.01 | 0.02            | -0.02 | 0.02   | 0.00  | -0.01         | -0.01 | -0.05  | -0.03 | 0.02       | -0.02 | 0.01   | 0.01  | 0.03     |  |
| Jan | 0.00  | -0.01           | -0.01 | 0.03   | 0.07  | 0.00          | 0.06  | -0.01  | -0.02 | 0.01       | -0.02 | 0.03   | 0.02  | 0.03     |  |
| Feb | 0.00  | 0.01            | 0.02  | 0.03   | 0.08  | 0.04          | 0.07  | 0.03   | 0.04  | 0.03       | 0.06  | 0.07   | 0.02  | 0.02     |  |
| Mar | 0.09  | 0.01            | 0.13  | 0.00   | 0.09  | 0.04          | 0.08  | 0.06   | 0.11  | 0.04       | 0.13  | 0.08   | 0.03  | 0.01     |  |
| Apr | 0.15  | 0.00            | 0.18  | 0.00   | 0.10  | 0.02          | 0.12  | 0.05   | 0.16  | 0.03       | 0.16  | 0.07   | 0.06  | -0.01    |  |
| May | 0.07  | -0.04           | 0.10  | 0.00   | 0.08  | -0.03         | 0.09  | 0.00   | 0.12  | -0.01      | 0.10  | 0.02   | 0.06  | -0.03    |  |
| Jun | 0.01  | -0.02           | 0.01  | -0.02  | 0.04  | -0.02         | 0.03  | -0.01  | 0.02  | -0.02      | 0.00  | 0.00   | 0.01  | -0.02    |  |
| Jul | -0.01 | 0.00            | -0.01 | -0.02  | -0.01 | -0.01         | -0.01 | 0.00   | -0.01 | -0.01      | -0.02 | 0.00   | -0.01 | 0.00     |  |
| Aug | -0.01 | 0.00            | -0.01 | -0.01  | 0.00  | 0.00          | -0.01 | 0.00   | -0.01 | 0.00       | -0.01 | 0.00   | 0.00  | 0.00     |  |
| Sep | 0.00  | 0.00            | 0.00  | -0.01  | 0.00  | 0.00          | 0.00  | 0.00   | 0.00  | 0.00       | 0.00  | 0.00   | 0.00  | 0.00     |  |

| MD  |       | Elevation>3k |       |        |      |               |      |        |       |            |       |        |      | UCLA SWE |  |
|-----|-------|--------------|-------|--------|------|---------------|------|--------|-------|------------|-------|--------|------|----------|--|
|     |       | cnrm-esm2-1  |       |        |      | ec-earth3-veg |      |        |       | mpi-esm1-2 |       |        |      |          |  |
|     |       | 9 km         |       | 100 km |      | 9 km          |      | 100 km |       | 9 km       |       | 100 km |      |          |  |
|     |       | CA           | CO    | CA     | CO   | CA            | CO   | CA     | CO    | CA         | CO    | CA     | CO   |          |  |
| Oct | 0.00  | 0.01         | 0.00  | 0.00   | 0.00 | 0.01          | 0.00 | 0.01   | 0.00  | 0.01       | 0.00  | 0.01   | 0.00 | 0.00     |  |
| Nov | -0.01 | 0.01         | -0.01 | 0.00   | 0.00 | 0.01          | 0.00 | -0.04  | -0.01 | 0.02       | -0.01 | 0.00   | 0.01 | 0.02     |  |

|     |       |       |       |       |       |       |       |       |       |       |       |      |       |       |
|-----|-------|-------|-------|-------|-------|-------|-------|-------|-------|-------|-------|------|-------|-------|
| Dec | 0.00  | 0.01  | -0.02 | 0.02  | 0.00  | -0.01 | 0.00  | -0.06 | -0.03 | 0.02  | -0.02 | 0.01 | 0.02  | 0.04  |
| Jan | 0.03  | -0.02 | 0.02  | 0.03  | 0.11  | 0.00  | 0.09  | -0.02 | -0.01 | 0.00  | 0.00  | 0.04 | 0.05  | 0.03  |
| Feb | 0.04  | -0.01 | 0.06  | 0.03  | 0.13  | 0.04  | 0.11  | 0.03  | 0.08  | 0.03  | 0.10  | 0.08 | 0.05  | 0.02  |
| Mar | 0.15  | 0.00  | 0.20  | 0.01  | 0.15  | 0.05  | 0.14  | 0.08  | 0.16  | 0.05  | 0.20  | 0.11 | 0.08  | 0.01  |
| Apr | 0.23  | 0.02  | 0.26  | 0.01  | 0.17  | 0.04  | 0.19  | 0.11  | 0.23  | 0.05  | 0.23  | 0.13 | 0.11  | 0.01  |
| May | 0.15  | -0.02 | 0.20  | 0.03  | 0.17  | -0.01 | 0.18  | 0.06  | 0.22  | 0.02  | 0.20  | 0.09 | 0.13  | 0.00  |
| Jun | 0.06  | -0.03 | 0.07  | -0.03 | 0.10  | -0.02 | 0.10  | 0.00  | 0.08  | -0.03 | 0.05  | 0.02 | 0.06  | -0.02 |
| Jul | -0.01 | -0.01 | -0.02 | -0.04 | -0.02 | -0.01 | -0.01 | -0.01 | -0.02 | -0.02 | -0.03 | 0.00 | -0.01 | -0.01 |
| Aug | -0.01 | 0.00  | -0.01 | -0.03 | -0.01 | -0.01 | -0.01 | 0.00  | -0.01 | 0.00  | -0.01 | 0.00 | 0.00  | 0.00  |
| Sep | 0.00  | 0.00  | 0.00  | -0.01 | 0.00  | 0.00  | 0.00  | 0.00  | 0.00  | 0.00  | -0.01 | 0.00 | 0.00  | 0.00  |

| MD  | Forest      |       |        |       |               |       |        |       |            |       |        |       |          |       |
|-----|-------------|-------|--------|-------|---------------|-------|--------|-------|------------|-------|--------|-------|----------|-------|
|     | cnrm-esm2-1 |       |        |       | ec-earth3-veg |       |        |       | mpi-esm1-2 |       |        |       | UCLA SWE |       |
|     | 9 km        |       | 100 km |       | 9 km          |       | 100 km |       | 9 km       |       | 100 km |       | CA       | CO    |
|     | CA          | CO    | CA     | CO    | CA            | CO    | CA     | CO    | CA         | CO    | CA     | CO    |          |       |
| Oct | 0.00        | 0.01  | 0.00   | 0.00  | 0.00          | 0.00  | 0.00   | 0.00  | 0.00       | 0.01  | 0.00   | 0.00  | 0.00     | 0.00  |
| Nov | -0.01       | 0.01  | -0.01  | -0.01 | 0.00          | -0.01 | 0.00   | -0.06 | 0.00       | 0.01  | 0.00   | -0.01 | 0.00     | 0.01  |
| Dec | -0.02       | 0.00  | -0.03  | 0.01  | 0.00          | -0.03 | -0.01  | -0.09 | -0.03      | 0.01  | -0.03  | 0.00  | -0.01    | 0.03  |
| Jan | -0.06       | -0.04 | -0.07  | 0.02  | 0.03          | -0.02 | 0.02   | -0.04 | -0.06      | -0.02 | -0.06  | 0.03  | -0.03    | 0.02  |
| Feb | -0.09       | -0.02 | -0.07  | 0.02  | 0.02          | 0.02  | 0.02   | 0.01  | -0.01      | 0.02  | 0.01   | 0.08  | -0.05    | 0.00  |
| Mar | -0.02       | -0.02 | 0.02   | -0.02 | -0.01         | 0.03  | -0.01  | 0.07  | 0.01       | 0.04  | 0.03   | 0.11  | -0.07    | -0.01 |
| Apr | 0.02        | -0.03 | 0.03   | -0.04 | -0.03         | -0.01 | -0.02  | 0.06  | 0.02       | 0.01  | 0.01   | 0.10  | -0.07    | -0.05 |
| May | -0.05       | -0.09 | -0.03  | -0.03 | -0.04         | -0.08 | -0.04  | 0.00  | -0.02      | -0.04 | -0.04  | 0.04  | -0.05    | -0.08 |
| Jun | -0.03       | -0.05 | -0.03  | -0.05 | -0.01         | -0.04 | -0.02  | -0.02 | -0.02      | -0.06 | -0.04  | 0.00  | -0.02    | -0.05 |
| Jul | 0.00        | -0.01 | -0.01  | -0.05 | 0.00          | -0.02 | 0.00   | -0.01 | 0.00       | -0.02 | -0.01  | -0.01 | 0.00     | -0.01 |
| Aug | 0.00        | 0.00  | 0.00   | -0.03 | 0.00          | -0.01 | 0.00   | 0.00  | 0.00       | 0.00  | 0.00   | 0.00  | 0.00     | 0.00  |
| Sep | 0.00        | 0.00  | 0.00   | -0.01 | 0.00          | 0.00  | 0.00   | 0.00  | 0.00       | 0.00  | 0.00   | 0.00  | 0.00     | 0.00  |

| RMSE | NoForest    |       |        |       |               |       |        |       |            |       |        |      |          |       |
|------|-------------|-------|--------|-------|---------------|-------|--------|-------|------------|-------|--------|------|----------|-------|
|      | cnrm-esm2-1 |       |        |       | ec-earth3-veg |       |        |       | mpi-esm1-2 |       |        |      | UCLA SWE |       |
|      | 9 km        |       | 100 km |       | 9 km          |       | 100 km |       | 9 km       |       | 100 km |      | CA       | CO    |
|      | CA          | CO    | CA     | CO    | CA            | CO    | CA     | CO    | CA         | CO    | CA     | CO   |          |       |
| Oct  | 0.00        | 0.01  | 0.00   | 0.00  | 0.00          | 0.00  | 0.00   | 0.00  | 0.00       | 0.01  | 0.00   | 0.00 | 0.00     | 0.00  |
| Nov  | -0.01       | 0.01  | -0.01  | 0.00  | 0.00          | 0.00  | 0.00   | -0.04 | -0.01      | 0.01  | 0.00   | 0.00 | 0.00     | 0.01  |
| Dec  | -0.01       | 0.01  | -0.01  | 0.02  | 0.00          | -0.01 | 0.00   | -0.06 | -0.02      | 0.01  | -0.01  | 0.01 | 0.01     | 0.03  |
| Jan  | 0.01        | -0.02 | 0.00   | 0.03  | 0.06          | 0.00  | 0.05   | -0.01 | -0.01      | 0.00  | -0.01  | 0.03 | 0.02     | 0.03  |
| Feb  | 0.01        | 0.00  | 0.02   | 0.03  | 0.06          | 0.04  | 0.06   | 0.03  | 0.04       | 0.03  | 0.05   | 0.08 | 0.02     | 0.02  |
| Mar  | 0.07        | 0.00  | 0.10   | 0.00  | 0.07          | 0.05  | 0.06   | 0.07  | 0.08       | 0.04  | 0.10   | 0.10 | 0.03     | 0.01  |
| Apr  | 0.11        | 0.01  | 0.13   | 0.00  | 0.08          | 0.03  | 0.09   | 0.08  | 0.11       | 0.04  | 0.11   | 0.10 | 0.05     | 0.00  |
| May  | 0.05        | -0.03 | 0.07   | 0.01  | 0.06          | -0.03 | 0.06   | 0.02  | 0.08       | 0.00  | 0.07   | 0.05 | 0.04     | -0.02 |
| Jun  | 0.00        | -0.02 | 0.01   | -0.03 | 0.03          | -0.02 | 0.02   | 0.00  | 0.02       | -0.03 | 0.00   | 0.01 | 0.01     | -0.02 |
| Jul  | -0.01       | -0.01 | -0.01  | -0.03 | -0.01         | -0.01 | -0.01  | -0.01 | -0.01      | -0.01 | -0.01  | 0.00 | -0.01    | -0.01 |
| Aug  | 0.00        | 0.00  | 0.00   | -0.02 | 0.00          | 0.00  | 0.00   | 0.00  | 0.00       | 0.00  | -0.01  | 0.00 | 0.00     | 0.00  |
| Sep  | 0.00        | 0.00  | 0.00   | -0.01 | 0.00          | 0.00  | 0.00   | 0.00  | 0.00       | 0.00  | 0.00   | 0.00 | 0.00     | 0.00  |

| MD  | All         |      |        |      |               |      |        |      |            |      |        |      |          |      |
|-----|-------------|------|--------|------|---------------|------|--------|------|------------|------|--------|------|----------|------|
|     | cnrm-esm2-1 |      |        |      | ec-earth3-veg |      |        |      | mpi-esm1-2 |      |        |      | UCLA SWE |      |
|     | 9 km        |      | 100 km |      | 9 km          |      | 100 km |      | 9 km       |      | 100 km |      | CA       | CO   |
|     | CA          | CO   | CA     | CO   | CA            | CO   | CA     | CO   | CA         | CO   | CA     | CO   |          |      |
| Oct | 0.00        | 0.01 | 0.00   | 0.00 | 0.00          | 0.00 | 0.00   | 0.00 | 0.00       | 0.01 | 0.00   | 0.00 | 0.00     | 0.00 |



|            |       |       |       |       |       |       |       |       |       |       |       |      |       |       |
|------------|-------|-------|-------|-------|-------|-------|-------|-------|-------|-------|-------|------|-------|-------|
| <b>Nov</b> | -0.01 | 0.01  | -0.01 | 0.00  | 0.00  | 0.00  | 0.00  | -0.04 | -0.01 | 0.01  | 0.00  | 0.00 | 0.00  | 0.01  |
| <b>Dec</b> | -0.01 | 0.01  | -0.01 | 0.02  | 0.00  | -0.01 | 0.00  | -0.06 | -0.02 | 0.01  | -0.01 | 0.01 | 0.01  | 0.03  |
| <b>Jan</b> | 0.01  | -0.02 | 0.00  | 0.03  | 0.06  | 0.00  | 0.05  | -0.01 | -0.01 | 0.00  | -0.01 | 0.03 | 0.02  | 0.03  |
| <b>Feb</b> | 0.01  | 0.00  | 0.02  | 0.03  | 0.06  | 0.04  | 0.06  | 0.03  | 0.04  | 0.03  | 0.05  | 0.08 | 0.02  | 0.02  |
| <b>Mar</b> | 0.07  | 0.00  | 0.10  | 0.00  | 0.07  | 0.05  | 0.06  | 0.07  | 0.08  | 0.04  | 0.10  | 0.10 | 0.03  | 0.01  |
| <b>Apr</b> | 0.11  | 0.01  | 0.13  | 0.00  | 0.08  | 0.03  | 0.09  | 0.08  | 0.12  | 0.04  | 0.12  | 0.10 | 0.05  | 0.00  |
| <b>May</b> | 0.05  | -0.03 | 0.07  | 0.01  | 0.06  | -0.03 | 0.06  | 0.02  | 0.08  | 0.00  | 0.07  | 0.05 | 0.04  | -0.02 |
| <b>Jun</b> | 0.00  | -0.02 | 0.01  | -0.03 | 0.03  | -0.02 | 0.02  | 0.00  | 0.02  | -0.03 | 0.00  | 0.01 | 0.01  | -0.02 |
| <b>Jul</b> | -0.01 | -0.01 | -0.01 | -0.03 | -0.01 | -0.01 | -0.01 | -0.01 | -0.01 | -0.01 | -0.02 | 0.00 | -0.01 | -0.01 |
| <b>Aug</b> | 0.00  | 0.00  | 0.00  | -0.02 | 0.00  | 0.00  | 0.00  | 0.00  | 0.00  | 0.00  | -0.01 | 0.00 | 0.00  | 0.00  |
| <b>Sep</b> | 0.00  | 0.00  | 0.00  | -0.01 | 0.00  | 0.00  | 0.00  | 0.00  | 0.00  | 0.00  | 0.00  | 0.00 | 0.00  | 0.00  |

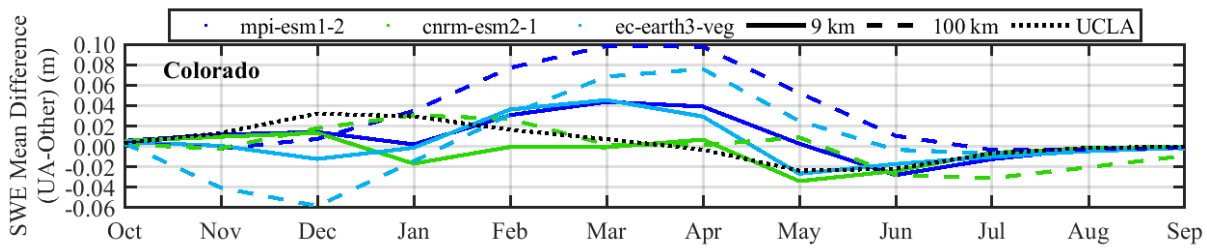

**Fig. S15.** Same as Fig. S11, but for comparison against the University of Arizona (UA) data.

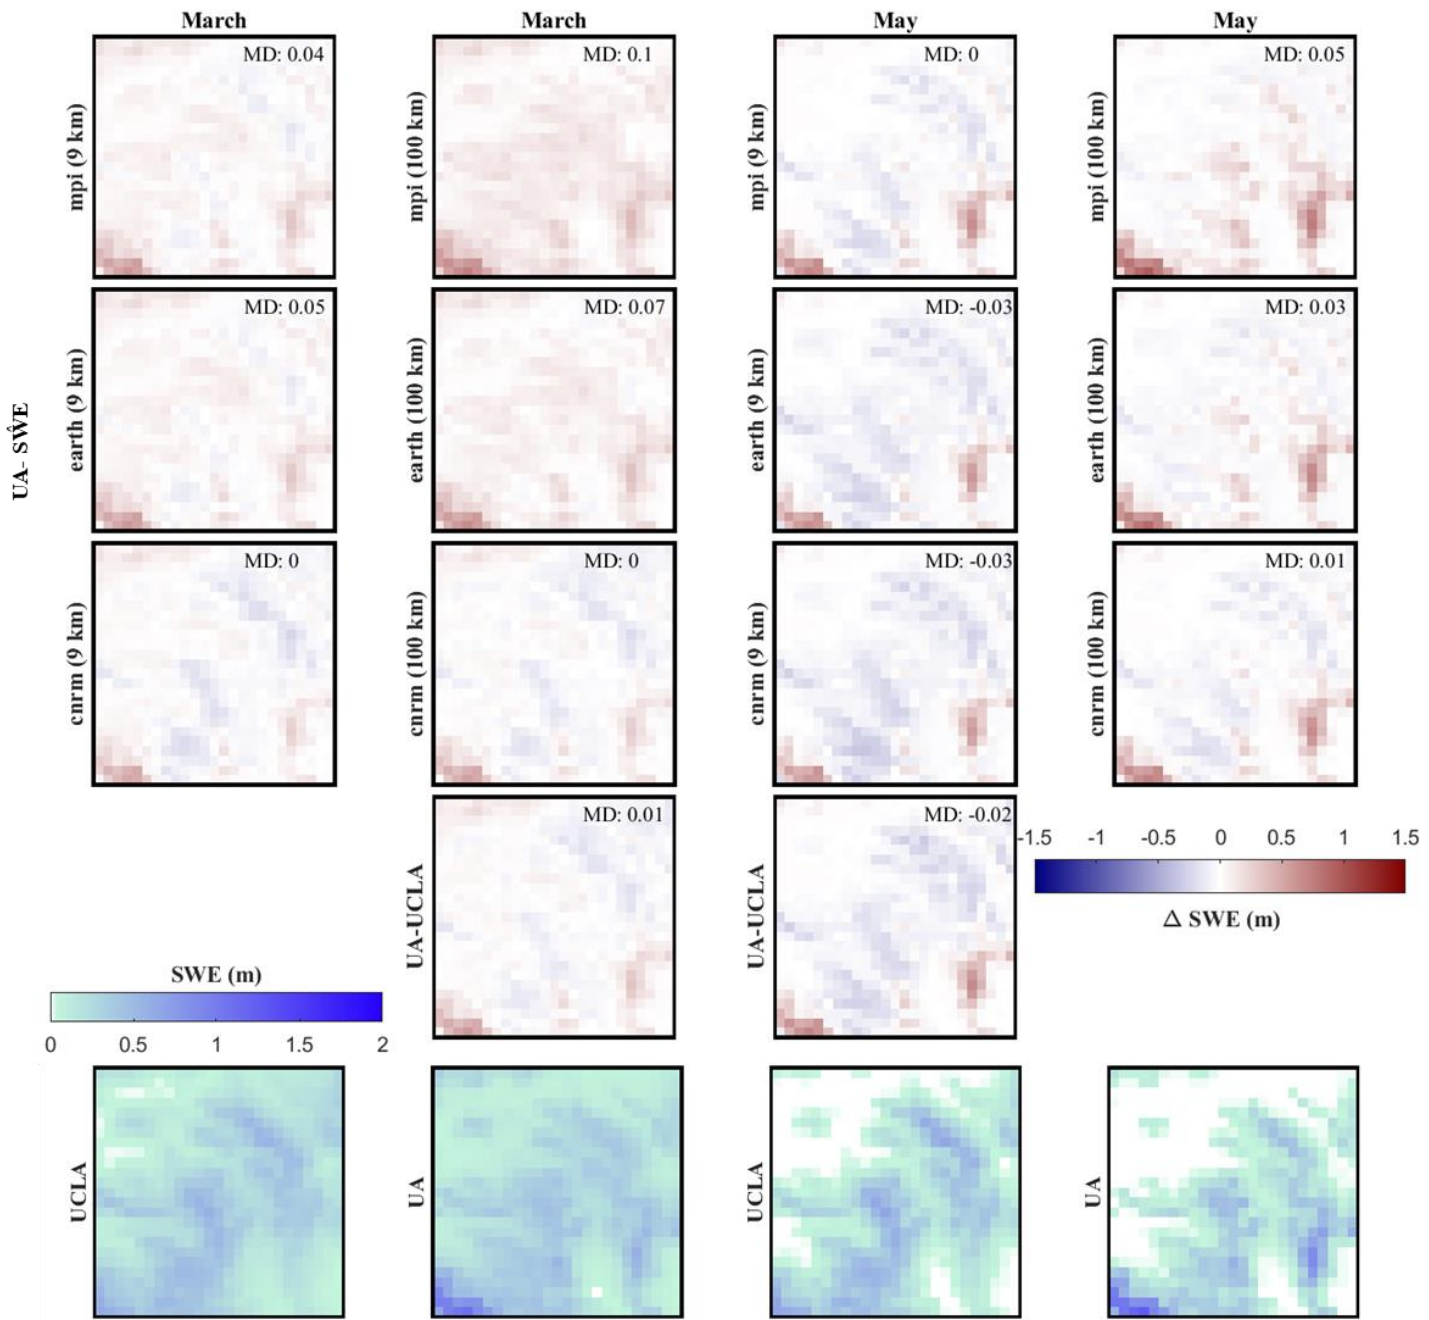

Fig. S16. Same as Fig. S12, but for comparison against the University of Arizona (UA) data.
